# Supplementary material for: Whole Genome Sequencing of Familial Non-Medullary Thyroid Cancer Identifies Germline Alterations in MAPK/ERK and PI3K/AKT Signaling Pathways
Source: Preprints.org preprint supplement (doi:10.20944/preprints201910.0154.v1), 2019-10-13
Supplement: Supplementary file 1 [file supplementary]

**Table S2.** List of genes present in the top 20 canonical pathways predicted by IPA. The position, annotation and PHRED-like CADD scores corresponding to the variants of these genes have been listed in this table. Genes corresponding to variants shortlisted using FCVPPv2 are marked in bold.

| Family   | Gene ID       | Chr_Pos_Ref_Alt | Annotation        | CADD_Phred | Present in the following top canonical pathways                                                                                                                                                                                                                                                                                                                                                                                                                                        |
|----------|---------------|-----------------|-------------------|------------|----------------------------------------------------------------------------------------------------------------------------------------------------------------------------------------------------------------------------------------------------------------------------------------------------------------------------------------------------------------------------------------------------------------------------------------------------------------------------------------|
| <b>1</b> | HSD17B4       | 5_118878833_G_A | downstream        | 12.5       | Estrogen-dependent breast cancer signaling                                                                                                                                                                                                                                                                                                                                                                                                                                             |
| <b>1</b> | MAP2K2        | 19_4124798_T_A  | Upstream          | 13.6       | cAMP-mediated signaling, G $\alpha$ s signaling, actin cytoskeleton signaling, telomerase signaling, colorectal cancer metastasis signaling, role of PI3K/AKT signaling in the pathogenesis of influenza, CCR3 signaling in eosinophils, G-protein coupled receptor signaling, GM-CSF signaling, SPINK1 general cancer pathway, GDNF family ligand-receptor interactions, thrombin signaling, non-small cell lung cancer signaling, anti-proliferative role of somatostatin receptor 2 |
| <b>1</b> | MYLK          | 3_123331882_A_T | ncRNA_UTR3        | 12.8       | Actin cytoskeleton signaling, CCR3 signaling in eosinophils, thrombin signaling                                                                                                                                                                                                                                                                                                                                                                                                        |
| <b>1</b> | PDE1A         | 2_183005299_G_C | UTR3              | 11.7       | Sperm motility, cAMP-mediated signaling, G-protein coupled receptor signaling                                                                                                                                                                                                                                                                                                                                                                                                          |
| <b>1</b> | <b>RYK</b>    | 3_133876591_C_T | UTR3              | 12.7       | Sperm motility, IL-15 production                                                                                                                                                                                                                                                                                                                                                                                                                                                       |
| <b>1</b> | TBXA2R        | 19_3594840_C_G  | nonsynonymous SNV | 19.4       | cAMP-mediated signaling, eicosanoid signaling, G-protein coupled receptor signaling                                                                                                                                                                                                                                                                                                                                                                                                    |
| <b>1</b> | <b>TIAM1</b>  | 21_32526579_G_A | nonsynonymous SNV | 35         | Actin cytoskeleton signaling                                                                                                                                                                                                                                                                                                                                                                                                                                                           |
| <b>1</b> | TTN           | 2_179422237_C_T | nonsynonymous SNV | 23.1       | Actin cytoskeleton signaling                                                                                                                                                                                                                                                                                                                                                                                                                                                           |
| <b>2</b> | APPL1         | 3_57261616_G_A  | upstream          | 11.6       | Colorectal cancer metastasis signaling                                                                                                                                                                                                                                                                                                                                                                                                                                                 |
| <b>2</b> | CRKL          | 22_21270749_C_A | upstream          | 11.4       | Actin cytoskeleton signaling, Role of PI3K/AKT signaling in the pathogenesis of influenza                                                                                                                                                                                                                                                                                                                                                                                              |
| <b>2</b> | CSF2RA        | X_1422861_T_C   | stoploss SNV      | 14.5       | Sperm motility, IL-15 production, GM-CSF signaling                                                                                                                                                                                                                                                                                                                                                                                                                                     |
| <b>2</b> | DVL1          | 1_1275695_G_A   | nonsynonymous SNV | 24         | Colorectal cancer metastasis signaling                                                                                                                                                                                                                                                                                                                                                                                                                                                 |
| <b>2</b> | EGFR          | 7_55259429_G_A  | synonymous SNV    | 11.1       | Sperm motility, IL-15 production, telomerase signaling, colorectal cancer metastasis signaling, SPINK1 general cancer pathway, thrombin signaling, non-small cell lung cancer signaling, estrogen-dependent breast cancer signaling                                                                                                                                                                                                                                                    |
| <b>2</b> | <b>GSR</b>    | 8_30585111_C_T  | nonsynonymous SNV | 34         | Glutathione redox reactions II                                                                                                                                                                                                                                                                                                                                                                                                                                                         |
| <b>2</b> | PIK3R5        | 17_8790439_G_A  | nonsynonymous SNV | 22.3       | Actin cytoskeleton signaling, telomerase signaling, colorectal cancer metastasis signaling, role of PI3K/AKT signaling in the pathogenesis of influenza, CCR3 signaling in eosinophils, G-protein coupled receptor signaling, GM-CSF signaling, SPINK1 general cancer pathway, GDNF family ligand-receptor interactions, thrombin signaling, non-small cell lung cancer signaling, anti-proliferative role of somatostatin receptor 2, estrogen-dependent breast cancer signaling      |
| <b>2</b> | <b>PNPLA8</b> | 7_108112453_A_G | UTR3              | 13.3       | Sperm motility, eicosanoid signaling                                                                                                                                                                                                                                                                                                                                                                                                                                                   |
| <b>2</b> | <b>PTGIR</b>  | 19_47124811_C_T | nonsynonymous SNV | 35         | cAMP-mediated signaling, G $\alpha$ s signaling, eicosanoid signaling, G-protein coupled receptor signaling                                                                                                                                                                                                                                                                                                                                                                            |

|   |        |                             |                   |      |                                                                                                                                                             |
|---|--------|-----------------------------|-------------------|------|-------------------------------------------------------------------------------------------------------------------------------------------------------------|
| 2 | RET    | 10_43600559_T_C             | nonsynonymous SNV | 26.3 | Sperm motility, IL-15 production, GDNF family ligand-receptor interactions                                                                                  |
| 4 | AKAP13 | 15_86287866_C_T             | synonymous SNV    | 12.8 | cAMP-mediated signaling                                                                                                                                     |
| 4 | GNB2   | 7_100271438_G_GCGCCGCCGCCGC | UTR5, Indel       | 17.2 | Gαs signaling, colorectal cancer metastasis signaling, CCR3 signaling in eosinophils, thrombin signaling, anti-proliferative role of somatostatin receptors |
| 4 | GPB1   | 7_1131887_C_T               | nonsynonymous SNV | 22   | cAMP-mediated signaling, Gαs signaling, G-protein coupled receptor signaling                                                                                |
| 5 | ACSS3  | 12_81593172_T_G             | nonsynonymous SNV | 32   | Acetate conversion to Acetyl-CoA                                                                                                                            |
| 5 | POT1   | 7_124532359_C_A             | nonsynonymous SNV | 32   | Telomerase signaling                                                                                                                                        |
