# Supplementary material for: Whole Genome Sequencing of Familial Non-Medullary Thyroid Cancer Identifies Germline Alterations in MAPK/ERK and PI3K/AKT Signaling Pathways
Source: Preprints.org preprint supplement (doi:10.20944/preprints201910.0154.v1), 2019-10-13
Supplement: Supplementary file 1 [file Table S1 Ingenuity Pathway Analysis Results.xls]

## Sheet: A. Input Genes
ID	Symbol
ACSS3	ACSS3
ACVR1B	ACVR1B
ADAMTS1	ADAMTS1
AFF2	AFF2
AGBL1-AS1	AGBL1-AS1
AHNAK2	AHNAK2
AKAP13	AKAP13
ANK3	ANK3
ANXA3	ANXA3
APCDD1L-AS1	APCDD1L-DT
APPL1	APPL1
AR	AR
ARID3B	ARID3B
ARNT2	ARNT2
ATP8B5P	ATP8B5P
AVIL	AVIL
AZIN1	AZIN1
B4GALT4	B4GALT4
BACH2	BACH2
BNC2	BNC2
C12orf57	C12orf57
C17orf100	C17orf100
C20orf194	C20orf194
CAPN15	CAPN15
CASC16	CASC16
CCAT1	CCAT1
CCDC144B	CCDC144B
CCDC26	CCDC26
CEP350	CEP350
CEP41	CEP41
CHEK2	CHEK2
CIR1	CIR1
CLDN18	CLDN18
CLEC18B	CLEC18B
COMMD4	COMMD4
COX10-AS1	COX10-AS1
CPXM1	CPXM1
CRKL	CRKL
CSF2RA	CSF2RA
CSMD1	CSMD1
CTB-99A3.1	CTB-99A3.1
CTSH	CTSH
CTSS	CTSS
DAPL1	DAPL1
DECR1	DECR1
DENND5B-AS1	DENND5B-AS1
DESI2	DESI2
DNAH1	DNAH1
DNAI1	DNAI1
DNAJC27	DNAJC27
DPYSL3	DPYSL3
LRRC48	DRC3
DVL1	DVL1
ECE2	ECE2
EGFR	EGFR
EPYC	EPYC
ERV3-1	ERV3-1
ESPL1	ESPL1
ETNK1	ETNK1
EWSR1	EWSR1
C17orf70	FAAP100
FAM118B	FAM118B
FAM129A	FAM129A
FGF14-IT1	FGF14-IT1
FIGNL1	FIGNL1
FRYL	FRYL
GALNT10	GALNT10
GNB2	GNB2
GPER1	GPER1
GRIA2	GRIA2
GSR	GSR
GYPE	GYPE
HAND2-AS1	HAND2-AS1
HAX1	HAX1
HCN4	HCN4
HEATR1	HEATR1
HMX2	HMX2
HOXC8	HOXC8
HSD17B4	HSD17B4
HTR5A-AS1	HTR5A-AS1
IGSF9	IGSF9
IMPG2	IMPG2
JRKL-AS1	JRKL-AS1
KATNAL2	KATNAL2
KCNE3	KCNE3
KCNRG	KCNRG
KCNT1	KCNT1
KCTD15	KCTD15
KLF7	KLF7
KLHL18	KLHL18
LAMA1	LAMA1
LANCL2	LANCL2
LINC00189	LINC00189
LINC00348	LINC00348
LINC00535	LINC00535
LINC00536	LINC00536
LINC00539	LINC00539
LINC00599	LINC00599
LINC00607	LINC00607
LINC00670	LINC00670
LINC01005	LINC01005
AC004158.2	LINC01572
LMBRD2	LMBRD2
LMOD2	LMOD2
AC067959.1	LOC105374317
AC007091.1	LOC105375179
LRPPRC	LRPPRC
LSR	LSR
LTBP4	LTBP4
MAN2B2	MAN2B2
MAP2K2	MAP2K2
MECP2	MECP2
MIR33B	mir-33
hsa-mir-490	miR-490-3p (miRNAs w/seed AACCUGG)
MOGAT2	MOGAT2
MPP6	MPP6
MRPL51	MRPL51
MYBPC1	MYBPC1
MYLK	MYLK
NCAM2	NCAM2
NETO1	NETO1
NF2	NF2
NKTR	NKTR
NLK	NLK
NOP2	NOP2
NRP1	NRP1
NTRK3-AS1	NTRK3-AS1
NUPL1	NUP58
OBSCN	OBSCN
C1orf27	ODR4
OSGIN2	OSGIN2
P4HB	P4HB
PCM1	PCM1
PDE1A	PDE1A
PDHA1	PDHA1
PER3	PER3
PGAM1P5	PGAM1P5
PHTF1	PHTF1
PIK3R5	PIK3R5
PITPNM3	PITPNM3
PKHD1L1	PKHD1L1
PLEKHA8	PLEKHA8
PLEKHO1	PLEKHO1
PNPLA2	PNPLA2
PNPLA8	PNPLA8
POT1	POT1
PPP1R9A	PPP1R9A
PROS1	PROS1
C11orf89	PRR33
PTGIR	PTGIR
PTMA	PTMA
PTPRE	PTPRE
RET	RET
RNF216	RNF216
RPS11	RPS11
RPS3A	RPS3A
RTTN	RTTN
RYK	RYK
SATB2	SATB2
SCN10A	SCN10A
SDK1	SDK1
SETX	SETX
SGTB	SGTB
U91319.1	SHISA9
SHROOM3	SHROOM3
SLC25A12	SLC25A12
SLC35A4	SLC35A4
SP8	SP8
SPA17	SPA17
SPARC	SPARC
SPOCK1	SPOCK1
SPOPL	SPOPL
SPRED1	SPRED1
SPRR3	SPRR3
STAP1	STAP1
STEAP1B	STEAP1B
STK32A	STK32A
STRN3	STRN3
SVEP1	SVEP1
TACC2	TACC2
TANGO6	TANGO6
TBXA2R	TBXA2R
TFCP2	TFCP2
TG	TG
THRB	THRB
TIAM1	TIAM1
TMEM190	TMEM190
TNFRSF8	TNFRSF8
TRAPPC13	TRAPPC13
TRGJP2	TRGJP2
TRIM3	TRIM3
TRIM55	TRIM55
TSHZ3	TSHZ3
TSPYL2	TSPYL2
TTN	TTN
TUG1	TUG1
UBE4A	UBE4A
UBN1	UBN1
USP2-AS1	USP2-AS1
YTHDC1	YTHDC1
ZBTB41	ZBTB41
ZKSCAN1	ZKSCAN1
ZNF45	ZNF45
ZNF532	ZNF532
ZNF608	ZNF608
ZNF703	ZNF703

## Sheet: B. Diseases and Bio Functions
Categories	Functions	Diseases or Functions Annotation	p-Value	Molecules	# Molecules
Cancer, Organismal Injury and Abnormalities	neoplasia	Neoplasia of cells	8.6e-11	HOXC8,HAX1,NETO1,SATB2,ESPL1,LSR,DNAH1,OBSCN,PIK3R5,NCAM2,MYBPC1,CEP350,TRIM3,SPRED1,SPA17,GPER1,SHROOM3,LMBRD2,CEP41,TBXA2R,STRN3,TSHZ3,GSR,LANCL2,RNF216,PTGIR,AZIN1,PHTF1,POT1,BACH2,BNC2,EGFR,KCNRG,SCN10A,NF2,LAMA1,CSMD1,LRPPRC,CRKL,SVEP1,TIAM1,PPP1R9A,NLK,CLEC18B,HEATR1,FRYL,ADAMTS1,ACVR1B,ANK3,AR,RYK,NRP1,MYLK,EWSR1,THRB,TRIM55,CHEK2,ERV3-1,CIR1,CCAT1,MECP2,CSF2RA,RET,PCM1,KCTD15,ODR4,PROS1,R…	95
Cancer, Organismal Injury and Abnormalities	cancer	Cancer of cells	1.15e-10	HOXC8,HAX1,NETO1,SATB2,ESPL1,LSR,DNAH1,OBSCN,PIK3R5,NCAM2,MYBPC1,CEP350,TRIM3,SPRED1,SPA17,GPER1,SHROOM3,LMBRD2,CEP41,TBXA2R,STRN3,TSHZ3,GSR,LANCL2,RNF216,PTGIR,AZIN1,PHTF1,POT1,BACH2,BNC2,EGFR,KCNRG,SCN10A,NF2,LAMA1,CSMD1,LRPPRC,CRKL,SVEP1,TIAM1,PPP1R9A,NLK,CLEC18B,HEATR1,FRYL,ADAMTS1,ACVR1B,ANK3,AR,NRP1,MYLK,EWSR1,THRB,TRIM55,CHEK2,ERV3-1,CIR1,CCAT1,MECP2,CSF2RA,RET,PCM1,KCTD15,ODR4,PROS1,RTTN,…	93
Cancer, Organismal Injury and Abnormalities	upper aero-digestive squamous cell carcinoma	Upper aero-digestive squamous cell carcinoma	1.67e-09	HOXC8,HAX1,ERV3-1,CCAT1,CIR1,MECP2,SATB2,LSR,RET,KCTD15,PCM1,NCAM2,CEP350,TRIM3,ODR4,RTTN,TSHZ3,GRIA2,PNPLA8,TG,AZIN1,PHTF1,LTBP4,NKTR,BNC2,EGFR,NF2,LAMA1,LRPPRC,CSMD1,SVEP1,PKHD1L1,TIAM1,AHNAK2,HEATR1,DVL1,FRYL,AR,CTSH,MAN2B2,NRP1,SDK1,DPYSL3,SLC25A12,TTN,EWSR1,ZNF608,SHISA9	48
Cancer, Organismal Injury and Abnormalities, Reproductive System Disease	endometrioid endometrial cancer	Uterine endometrioid carcinoma	4.57e-09	YTHDC1,NETO1,SATB2,LSR,DNAH1,OBSCN,NCAM2,MYBPC1,STK32A,LMBRD2,STRN3,TSHZ3,AFF2,IMPG2,EPYC,SPOCK1,BNC2,EGFR,SCN10A,LMOD2,MOGAT2,NF2,CSMD1,SVEP1,PPP1R9A,ACVR1B,GNB2,ANK3,AR,UBE4A,NRP1,MYLK,THRB,C20orf194,CHEK2,SETX,PROS1,RTTN,PER3,GRIA2,ZNF532,TG,ECE2,LTBP4,NKTR,FIGNL1,TNFRSF8,PKHD1L1,AHNAK2,KCNT1,ZKSCAN1,UBN1,SDK1,PTPRE,STAP1,SLC25A12,TTN,ZBTB41,PDE1A,SHISA9	60
Cancer, Organismal Injury and Abnormalities	squamous-cell carcinoma	Squamous-cell carcinoma	4.9e-09	HOXC8,HAX1,SATB2,LSR,DNAH1,OBSCN,PIK3R5,NCAM2,MYBPC1,CEP350,TRIM3,SPA17,TBXA2R,TSHZ3,RNF216,PTGIR,AZIN1,PHTF1,BACH2,BNC2,EGFR,NF2,LAMA1,CSMD1,LRPPRC,SVEP1,TIAM1,PPP1R9A,NLK,HEATR1,CLEC18B,FRYL,ACVR1B,ANK3,AR,NRP1,MYLK,EWSR1,CHEK2,ERV3-1,CCAT1,CIR1,MECP2,RET,KCTD15,PCM1,ODR4,PROS1,RTTN,PER3,GRIA2,PNPLA8,TG,ECE2,LTBP4,NKTR,TNFRSF8,PKHD1L1,ACSS3,AHNAK2,DVL1,HCN4,SPARC,CTSH,MAN2B2,SDK1,DPYSL3,PTPRE,M…	73
Cancer, Organismal Injury and Abnormalities	abdominal carcinoma	Abdominal carcinoma	5.92e-09	HOXC8,AKAP13,OSGIN2,YTHDC1,OBSCN,PIK3R5,FAAP100,NCAM2,SP8,TRIM3,CEP350,STK32A,ARNT2,LMBRD2,CEP41,DESI2,TBXA2R,STRN3,TSHZ3,PLEKHA8,ZNF45,HMX2,DNAI1,ARID3B,PHTF1,BNC2,SPOCK1,CPXM1,GYPE,SCN10A,NF2,LAMA1,CSMD1,TIAM1,ADAMTS1,GNB2,AR,APPL1,UBE4A,NRP1,MYLK,DECR1,GALNT10,SPRR3,EWSR1,TRIM55,TSPYL2,CCAT1,CSF2RA,SLC35A4,KCTD15,ODR4,RTTN,PER3,RPS3A,TG,NKTR,FIGNL1,B4GALT4,NOP2,ANXA3,TUG1,TNFRSF8,ACSS3,AHNAK2,…	158
Cancer, Organismal Injury and Abnormalities, Reproductive System Disease	endometrioid endometrial adenocarcinoma	Endometrioid endometrial adenocarcinoma	6.82e-09	YTHDC1,NETO1,SATB2,LSR,DNAH1,OBSCN,NCAM2,MYBPC1,STK32A,LMBRD2,STRN3,TSHZ3,AFF2,IMPG2,EPYC,SPOCK1,BNC2,EGFR,SCN10A,LMOD2,MOGAT2,NF2,CSMD1,SVEP1,PPP1R9A,GNB2,ANK3,AR,UBE4A,NRP1,MYLK,THRB,C20orf194,CHEK2,SETX,PROS1,RTTN,PER3,GRIA2,ZNF532,TG,ECE2,LTBP4,NKTR,FIGNL1,TNFRSF8,PKHD1L1,AHNAK2,KCNT1,ZKSCAN1,UBN1,SDK1,PTPRE,STAP1,SLC25A12,TTN,ZBTB41,PDE1A,SHISA9	59
Cancer, Organismal Injury and Abnormalities, Reproductive System Disease	endometrium tumor	Endometrium tumor	6.93e-09	YTHDC1,NETO1,SATB2,ESPL1,LSR,DNAH1,OBSCN,NCAM2,MYBPC1,STK32A,LMBRD2,STRN3,TSHZ3,GSR,AFF2,IMPG2,EPYC,SPOCK1,BNC2,EGFR,SCN10A,LMOD2,MOGAT2,NF2,CSMD1,SVEP1,TIAM1,PPP1R9A,CLEC18B,ACVR1B,GNB2,ANK3,AR,UBE4A,NRP1,MYLK,THRB,C20orf194,TSPYL2,CHEK2,RET,SETX,PROS1,RTTN,PER3,GRIA2,ZNF532,TG,ECE2,LTBP4,NKTR,FIGNL1,ANXA3,TNFRSF8,PKHD1L1,AHNAK2,KCNT1,DAPL1,ZKSCAN1,UBN1,SDK1,HSD17B4,PTPRE,STAP1,SLC25A12,TTN,ZBTB…	69
Cancer, Organismal Injury and Abnormalities, Reproductive System Disease	endometrial carcinoma	Endometrial carcinoma	7.42e-09	YTHDC1,NETO1,SATB2,LSR,DNAH1,OBSCN,NCAM2,MYBPC1,STK32A,LMBRD2,STRN3,TSHZ3,GSR,AFF2,IMPG2,EPYC,SPOCK1,BNC2,EGFR,SCN10A,LMOD2,MOGAT2,NF2,CSMD1,SVEP1,TIAM1,PPP1R9A,CLEC18B,ACVR1B,GNB2,ANK3,AR,UBE4A,NRP1,MYLK,THRB,C20orf194,CHEK2,RET,SETX,PROS1,RTTN,PER3,GRIA2,ZNF532,TG,ECE2,LTBP4,NKTR,FIGNL1,TNFRSF8,PKHD1L1,AHNAK2,KCNT1,DAPL1,ZKSCAN1,UBN1,SDK1,HSD17B4,PTPRE,STAP1,SLC25A12,TTN,SHISA9,ZBTB41,PDE1A	66
Cancer, Organismal Injury and Abnormalities	development	Development of carcinoma	1.48e-08	HOXC8,AKAP13,OSGIN2,YTHDC1,OBSCN,PIK3R5,NCAM2,SP8,CEP350,TRIM3,STK32A,LMBRD2,DESI2,TBXA2R,STRN3,TSHZ3,LANCL2,HMX2,DNAI1,ARID3B,AZIN1,PHTF1,SPOCK1,BNC2,CPXM1,GYPE,SCN10A,NF2,LAMA1,CSMD1,TIAM1,ADAMTS1,GNB2,AR,APPL1,UBE4A,NRP1,MYLK,EWSR1,TRIM55,CCAT1,CSF2RA,KCTD15,ODR4,RTTN,PER3,TG,NKTR,FIGNL1,NOP2,ANXA3,TNFRSF8,AHNAK2,DAPL1,HCN4,MAN2B2,ZKSCAN1,SDK1,HSD17B4,PTPRE,MAP2K2,TFCP2,STAP1,SLC25A12,PTMA,ZBT…	123
Cancer, Organismal Injury and Abnormalities, Reproductive System Disease	uterine carcinoma	Uterine carcinoma	1.54e-08	YTHDC1,NETO1,SATB2,LSR,DNAH1,OBSCN,NCAM2,MYBPC1,STK32A,LMBRD2,STRN3,TSHZ3,GSR,AFF2,IMPG2,EPYC,CTSS,SPOCK1,BNC2,EGFR,SCN10A,LMOD2,MOGAT2,NF2,CSMD1,SVEP1,TIAM1,PPP1R9A,CLEC18B,ACVR1B,GNB2,ANK3,AR,UBE4A,NRP1,MYLK,THRB,C20orf194,CHEK2,RET,SETX,PROS1,RTTN,PER3,GRIA2,ZNF532,TG,ECE2,LTBP4,NKTR,FIGNL1,TNFRSF8,PKHD1L1,AHNAK2,KCNT1,DAPL1,CTSH,ZKSCAN1,UBN1,SDK1,HSD17B4,PTPRE,STAP1,SLC25A12,TTN,ZBTB41,PDE1A,…	68
Cancer, Organismal Injury and Abnormalities, Reproductive System Disease	endometrial cancer	Endometrial cancer	1.63e-08	YTHDC1,NETO1,SATB2,ESPL1,LSR,DNAH1,OBSCN,NCAM2,MYBPC1,STK32A,LMBRD2,STRN3,TSHZ3,GSR,AFF2,IMPG2,EPYC,SPOCK1,BNC2,EGFR,SCN10A,LMOD2,MOGAT2,NF2,CSMD1,SVEP1,TIAM1,PPP1R9A,CLEC18B,ACVR1B,GNB2,ANK3,AR,UBE4A,NRP1,MYLK,THRB,C20orf194,CHEK2,RET,SETX,PROS1,RTTN,PER3,GRIA2,ZNF532,TG,ECE2,LTBP4,NKTR,FIGNL1,ANXA3,TNFRSF8,PKHD1L1,AHNAK2,KCNT1,DAPL1,ZKSCAN1,UBN1,SDK1,HSD17B4,PTPRE,STAP1,SLC25A12,TTN,ZBTB41,PDE1…	68
Cancer, Organismal Injury and Abnormalities	upper aerodigestive tract carcinoma	Upper aerodigestive tract carcinoma	1.76e-08	HOXC8,HAX1,SATB2,LSR,NCAM2,CEP350,TRIM3,TSHZ3,PTGIR,ARID3B,AZIN1,PHTF1,BNC2,EGFR,SCN10A,NF2,LAMA1,CSMD1,LRPPRC,SVEP1,TIAM1,HEATR1,FRYL,ANK3,AR,NRP1,EWSR1,ERV3-1,CCAT1,CIR1,MECP2,RET,KCTD15,PCM1,ODR4,RTTN,GRIA2,PNPLA8,TG,LTBP4,NKTR,PKHD1L1,ACSS3,AHNAK2,DVL1,CTSH,MAN2B2,SDK1,DPYSL3,PTPRE,SLC25A12,TTN,ZNF608,SHISA9	54
Cancer, Gastrointestinal Disease, Organismal Injury and Abnormalities	upper gastrointestinal carcinoma	Upper gastrointestinal carcinoma	2.15e-08	HOXC8,HAX1,OSGIN2,SATB2,LSR,OBSCN,NCAM2,CEP350,TRIM3,TSHZ3,AFF2,PTGIR,ARID3B,AZIN1,PHTF1,SPOCK1,BNC2,EGFR,SCN10A,NF2,LAMA1,CSMD1,LRPPRC,TIAM1,NLK,HEATR1,FRYL,ACVR1B,ANK3,AR,EWSR1,P4HB,TRIM55,ERV3-1,CIR1,MECP2,CSF2RA,RET,KCTD15,ODR4,RTTN,PER3,GRIA2,PNPLA8,ZNF532,TG,ECE2,LTBP4,NKTR,SGTB,CLDN18,PKHD1L1,ACSS3,AHNAK2,DVL1,CTSH,SDK1,DPYSL3,PTPRE,MAP2K2,SLC25A12,TTN,ZNF608,SHISA9	64
Cancer, Organismal Injury and Abnormalities	head and neck squamous cell cancer	Head and neck squamous cell carcinoma	2.66e-08	HOXC8,HAX1,SATB2,LSR,DNAH1,PIK3R5,NCAM2,CEP350,TRIM3,TBXA2R,TSHZ3,AZIN1,PHTF1,BACH2,BNC2,EGFR,NF2,LAMA1,CSMD1,LRPPRC,SVEP1,TIAM1,HEATR1,CLEC18B,FRYL,ACVR1B,AR,NRP1,EWSR1,CHEK2,ERV3-1,CCAT1,CIR1,MECP2,RET,KCTD15,PCM1,ODR4,RTTN,PER3,GRIA2,TG,LTBP4,NKTR,TNFRSF8,PKHD1L1,AHNAK2,HCN4,SPARC,CTSH,MAN2B2,SDK1,MAP2K2,SLC25A12,TTN,ZNF608,SHISA9	57
Cancer, Gastrointestinal Disease, Organismal Injury and Abnormalities	large intestine carcinoma	Large intestine carcinoma	3.83e-08	HOXC8,AKAP13,OSGIN2,YTHDC1,OBSCN,PIK3R5,FAAP100,NCAM2,SP8,TRIM3,CEP350,STK32A,ARNT2,LMBRD2,DESI2,TBXA2R,TSHZ3,PLEKHA8,ZNF45,HMX2,DNAI1,ARID3B,PHTF1,BNC2,SPOCK1,CPXM1,GYPE,SCN10A,NF2,LAMA1,CSMD1,TIAM1,ADAMTS1,GNB2,AR,APPL1,NRP1,MYLK,DECR1,GALNT10,EWSR1,TRIM55,TSPYL2,CCAT1,CSF2RA,SLC35A4,KCTD15,ODR4,RTTN,PER3,TG,NKTR,FIGNL1,NOP2,ANXA3,TNFRSF8,AHNAK2,HCN4,MAN2B2,SDK1,HSD17B4,MAP2K2,TFCP2,STAP1,SLC25…	136
Cancer, Gastrointestinal Disease, Organismal Injury and Abnormalities	upper gastrointestinal tract cancer	Upper gastrointestinal tract cancer	4.95e-08	HOXC8,HAX1,OSGIN2,SATB2,LSR,OBSCN,NCAM2,CEP350,TRIM3,TSHZ3,AFF2,PTGIR,ARID3B,AZIN1,PHTF1,SPOCK1,BNC2,EGFR,SCN10A,NF2,LAMA1,CSMD1,LRPPRC,TIAM1,NLK,HEATR1,FRYL,ACVR1B,ANK3,AR,EWSR1,P4HB,TRIM55,ERV3-1,CCAT1,CIR1,MECP2,CSF2RA,RET,KCTD15,ODR4,RTTN,PER3,GRIA2,PNPLA8,ZNF532,TG,ECE2,LTBP4,NKTR,SGTB,CLDN18,PKHD1L1,ACSS3,AHNAK2,DVL1,CTSH,SDK1,DPYSL3,PTPRE,MAP2K2,SLC25A12,TTN,ZNF608,SHISA9	65
Cancer, Gastrointestinal Disease, Organismal Injury and Abnormalities	digestive system cancer	Digestive system cancer	5.41e-08	HOXC8,AKAP13,OSGIN2,YTHDC1,OBSCN,PIK3R5,FAAP100,NCAM2,SP8,TRIM3,CEP350,STK32A,ARNT2,LMBRD2,CEP41,DESI2,TBXA2R,TSHZ3,PLEKHA8,ZNF45,HMX2,DNAI1,ARID3B,AZIN1,PHTF1,BNC2,SPOCK1,CPXM1,GYPE,SCN10A,NF2,LAMA1,CSMD1,TIAM1,ADAMTS1,GNB2,AR,APPL1,UBE4A,NRP1,MYLK,DECR1,GALNT10,SPRR3,EWSR1,TRIM55,TSPYL2,CCAT1,CSF2RA,SLC35A4,KCTD15,ODR4,RTTN,PER3,RPS3A,TG,NKTR,FIGNL1,B4GALT4,mir-33,NOP2,ANXA3,TUG1,TNFRSF8,ACSS3,…	153
Cancer, Organismal Injury and Abnormalities, Reproductive System Disease	uterine cancer	Uterine cancer	5.61e-08	YTHDC1,NETO1,SATB2,ESPL1,LSR,DNAH1,OBSCN,NCAM2,MYBPC1,STK32A,LMBRD2,STRN3,TSHZ3,GSR,AFF2,IMPG2,EPYC,CTSS,SPOCK1,BNC2,EGFR,SCN10A,LMOD2,MOGAT2,NF2,CSMD1,SVEP1,TIAM1,PPP1R9A,CLEC18B,ACVR1B,GNB2,ANK3,AR,UBE4A,NRP1,MYLK,THRB,C20orf194,CHEK2,RET,SETX,PROS1,RTTN,PER3,GRIA2,ZNF532,TG,ECE2,LTBP4,NKTR,FIGNL1,ANXA3,TNFRSF8,PKHD1L1,AHNAK2,KCNT1,DAPL1,CTSH,ZKSCAN1,UBN1,SDK1,HSD17B4,PTPRE,STAP1,SLC25A12,TTN,Z…	70
Cancer, Gastrointestinal Disease, Organismal Injury and Abnormalities	gastrointestinal adenocarcinoma	Gastrointestinal adenocarcinoma	5.77e-08	HOXC8,AKAP13,OSGIN2,YTHDC1,OBSCN,PIK3R5,FAAP100,NCAM2,SP8,TRIM3,CEP350,STK32A,ARNT2,LMBRD2,TBXA2R,TSHZ3,PLEKHA8,ZNF45,HMX2,DNAI1,ARID3B,AZIN1,PHTF1,BNC2,SPOCK1,CPXM1,GYPE,SCN10A,NF2,LAMA1,CSMD1,TIAM1,ADAMTS1,GNB2,AR,APPL1,NRP1,MYLK,DECR1,GALNT10,EWSR1,TRIM55,TSPYL2,CCAT1,CSF2RA,SLC35A4,KCTD15,ODR4,RTTN,PER3,TG,NKTR,FIGNL1,NOP2,ANXA3,TNFRSF8,ACSS3,AHNAK2,HCN4,MAN2B2,SDK1,HSD17B4,PTPRE,MAP2K2,TFCP2…	137
Cancer, Organismal Injury and Abnormalities, Reproductive System Disease	uterine tumor	Uterine tumor	5.84e-08	YTHDC1,NETO1,SATB2,ESPL1,LSR,DNAH1,OBSCN,NCAM2,MYBPC1,STK32A,LMBRD2,STRN3,TSHZ3,GSR,AFF2,IMPG2,EPYC,CTSS,SPOCK1,BNC2,EGFR,SCN10A,LMOD2,MOGAT2,NF2,CSMD1,SVEP1,TIAM1,PPP1R9A,CLEC18B,ACVR1B,GNB2,ANK3,AR,UBE4A,NRP1,MYLK,THRB,C20orf194,TSPYL2,CHEK2,RET,SETX,PROS1,RTTN,PER3,GRIA2,ZNF532,TG,ECE2,LTBP4,NKTR,FIGNL1,ANXA3,TNFRSF8,PKHD1L1,AHNAK2,KCNT1,DAPL1,DVL1,CTSH,ZKSCAN1,UBN1,SDK1,HSD17B4,PTPRE,STAP1,SL…	72
Cancer, Gastrointestinal Disease, Organismal Injury and Abnormalities	gastrointestinal carcinoma	Gastrointestinal carcinoma	6.84e-08	HOXC8,AKAP13,OSGIN2,YTHDC1,OBSCN,PIK3R5,FAAP100,NCAM2,SP8,TRIM3,CEP350,STK32A,ARNT2,LMBRD2,DESI2,TBXA2R,TSHZ3,PLEKHA8,ZNF45,HMX2,DNAI1,ARID3B,AZIN1,PHTF1,BNC2,SPOCK1,CPXM1,GYPE,SCN10A,NF2,LAMA1,CSMD1,TIAM1,ADAMTS1,GNB2,AR,APPL1,NRP1,MYLK,DECR1,GALNT10,EWSR1,TRIM55,TSPYL2,CCAT1,CSF2RA,SLC35A4,KCTD15,ODR4,RTTN,PER3,TG,NKTR,FIGNL1,NOP2,ANXA3,TNFRSF8,ACSS3,AHNAK2,HCN4,CTSH,MAN2B2,SDK1,HSD17B4,PTPRE,M…	140
Cancer, Organismal Injury and Abnormalities	abdominal cancer	Abdominal cancer	7.96e-08	HOXC8,AKAP13,OSGIN2,YTHDC1,OBSCN,PIK3R5,FAAP100,NCAM2,SP8,TRIM3,CEP350,STK32A,ARNT2,LMBRD2,CEP41,DESI2,TBXA2R,STRN3,TSHZ3,PLEKHA8,ZNF45,HMX2,DNAI1,ARID3B,PHTF1,BNC2,SPOCK1,CPXM1,GYPE,SCN10A,NF2,LAMA1,CSMD1,TIAM1,ADAMTS1,GNB2,AR,APPL1,UBE4A,NRP1,MYLK,DECR1,GALNT10,SPRR3,EWSR1,TRIM55,TSPYL2,CCAT1,CSF2RA,SLC35A4,KCTD15,ODR4,RTTN,PER3,RPS3A,TG,NKTR,FIGNL1,B4GALT4,mir-33,NOP2,ANXA3,TUG1,TNFRSF8,ACSS3,…	159
Cancer, Organismal Injury and Abnormalities	endometrioid carcinoma	Endometrioid carcinoma	9.06e-08	HOXC8,YTHDC1,NETO1,SATB2,LSR,DNAH1,OBSCN,PIK3R5,NCAM2,MYBPC1,STK32A,LMBRD2,TBXA2R,STRN3,TSHZ3,AFF2,IMPG2,ARID3B,EPYC,SPOCK1,BNC2,EGFR,SCN10A,LMOD2,MOGAT2,NF2,CSMD1,LRPPRC,SVEP1,PPP1R9A,HEATR1,ACVR1B,GNB2,ANK3,AR,UBE4A,NRP1,MYLK,THRB,C20orf194,CHEK2,SETX,PROS1,RTTN,PER3,GRIA2,ZNF532,TG,ECE2,LTBP4,NKTR,FIGNL1,TNFRSF8,PKHD1L1,AHNAK2,KCNT1,ZKSCAN1,UBN1,SDK1,PTPRE,STAP1,SLC25A12,TTN,ZBTB41,PDE1A,SHISA9	66
Cancer, Organismal Injury and Abnormalities	cancer of head	Cancer of head	9.42e-08	HOXC8,HAX1,ERV3-1,CIR1,MECP2,SATB2,LSR,RET,NCAM2,ODR4,RTTN,GSR,GRIA2,AZIN1,PHTF1,LTBP4,POT1,NKTR,BNC2,EGFR,NF2,LAMA1,LRPPRC,CSMD1,PKHD1L1,TIAM1,AHNAK2,FRYL,AR,CTSH,NRP1,SDK1,MAP2K2,SLC25A12,TTN,EWSR1,ZNF608,SHISA9	38
Cancer, Organismal Injury and Abnormalities	incidence	Incidence of tumor	1.1e-07	HOXC8,AKAP13,OSGIN2,YTHDC1,OBSCN,PIK3R5,NCAM2,SP8,CEP350,TRIM3,STK32A,LMBRD2,DESI2,TBXA2R,STRN3,TSHZ3,LANCL2,HMX2,DNAI1,ARID3B,AZIN1,PHTF1,SPOCK1,BNC2,CPXM1,GYPE,SCN10A,NF2,LAMA1,CSMD1,TIAM1,ADAMTS1,GNB2,AR,APPL1,UBE4A,NRP1,MYLK,EWSR1,TRIM55,TSPYL2,CCAT1,CSF2RA,KCTD15,ODR4,RTTN,PER3,TG,NKTR,FIGNL1,NOP2,ANXA3,TNFRSF8,AHNAK2,DAPL1,HCN4,CTSH,MAN2B2,ZKSCAN1,SDK1,HSD17B4,PTPRE,MAP2K2,TFCP2,STAP1,SLC25…	126
Cancer, Gastrointestinal Disease, Organismal Injury and Abnormalities	large intestine adenocarcinoma	Large intestine adenocarcinoma	1.34e-07	HOXC8,AKAP13,OSGIN2,YTHDC1,OBSCN,PIK3R5,FAAP100,NCAM2,SP8,TRIM3,CEP350,STK32A,ARNT2,LMBRD2,TBXA2R,TSHZ3,PLEKHA8,ZNF45,HMX2,DNAI1,ARID3B,PHTF1,BNC2,SPOCK1,CPXM1,GYPE,SCN10A,NF2,LAMA1,CSMD1,TIAM1,ADAMTS1,GNB2,AR,APPL1,NRP1,MYLK,DECR1,GALNT10,EWSR1,TRIM55,TSPYL2,CCAT1,CSF2RA,SLC35A4,KCTD15,ODR4,RTTN,PER3,TG,NKTR,FIGNL1,NOP2,ANXA3,TNFRSF8,AHNAK2,HCN4,MAN2B2,SDK1,HSD17B4,MAP2K2,TFCP2,STAP1,SLC25A12,PT…	134
Cancer, Organismal Injury and Abnormalities	carcinoma	Carcinoma	2.01e-07	HOXC8,AKAP13,OSGIN2,YTHDC1,OBSCN,PIK3R5,FAAP100,NCAM2,SP8,TRIM3,CEP350,STK32A,ARNT2,LMBRD2,CEP41,DESI2,TBXA2R,STRN3,TSHZ3,PLEKHA8,ZNF45,RPS11,LANCL2,HMX2,DNAI1,ARID3B,AZIN1,PHTF1,BNC2,SPOCK1,CPXM1,GYPE,SCN10A,NF2,LAMA1,CSMD1,TIAM1,ADAMTS1,GNB2,AR,APPL1,UBE4A,NRP1,MYLK,DECR1,GALNT10,SPRR3,EWSR1,TRIM55,TSPYL2,CCAT1,CSF2RA,SLC35A4,KCTD15,ODR4,RTTN,PER3,RPS3A,TG,LINC00599,NKTR,FIGNL1,B4GALT4,NOP2,ANX…	165
Cancer, Organismal Injury and Abnormalities	adenocarcinoma	Adenocarcinoma	2.54e-07	HOXC8,AKAP13,OSGIN2,YTHDC1,OBSCN,PIK3R5,FAAP100,NCAM2,SP8,TRIM3,CEP350,STK32A,ARNT2,LMBRD2,CEP41,STRN3,TBXA2R,TSHZ3,PLEKHA8,ZNF45,LANCL2,HMX2,DNAI1,ARID3B,AZIN1,PHTF1,BNC2,SPOCK1,CPXM1,GYPE,SCN10A,NF2,LAMA1,CSMD1,TIAM1,ADAMTS1,GNB2,AR,APPL1,UBE4A,NRP1,MYLK,DECR1,GALNT10,EWSR1,TRIM55,TSPYL2,CCAT1,CSF2RA,SLC35A4,KCTD15,ODR4,RTTN,PER3,RPS3A,TG,NKTR,FIGNL1,B4GALT4,NOP2,ANXA3,TNFRSF8,ACSS3,AHNAK2,HCN4…	150
Cancer, Gastrointestinal Disease, Organismal Injury and Abnormalities	malignant neoplasm of large intestine	Malignant neoplasm of large intestine	3.02e-07	HOXC8,AKAP13,OSGIN2,YTHDC1,OBSCN,PIK3R5,FAAP100,NCAM2,SP8,TRIM3,CEP350,STK32A,ARNT2,LMBRD2,DESI2,TBXA2R,TSHZ3,PLEKHA8,ZNF45,HMX2,DNAI1,ARID3B,PHTF1,BNC2,SPOCK1,CPXM1,GYPE,SCN10A,NF2,LAMA1,CSMD1,TIAM1,ADAMTS1,GNB2,AR,APPL1,UBE4A,NRP1,MYLK,DECR1,GALNT10,EWSR1,TRIM55,TSPYL2,CCAT1,CSF2RA,SLC35A4,KCTD15,ODR4,RTTN,PER3,TG,NKTR,FIGNL1,mir-33,NOP2,ANXA3,TNFRSF8,AHNAK2,HCN4,MAN2B2,SDK1,HSD17B4,MAP2K2,TFCP…	138
Cancer, Gastrointestinal Disease, Organismal Injury and Abnormalities	oral squamous cell carcinoma	Oral squamous cell carcinoma	3.1e-07	HOXC8,HAX1,ERV3-1,CIR1,MECP2,SATB2,LSR,NCAM2,ODR4,RTTN,GRIA2,AZIN1,PHTF1,LTBP4,NKTR,BNC2,EGFR,NF2,LAMA1,LRPPRC,CSMD1,PKHD1L1,TIAM1,AHNAK2,FRYL,AR,CTSH,SDK1,SLC25A12,TTN,EWSR1,ZNF608,SHISA9	33
Cancer, Gastrointestinal Disease, Organismal Injury and Abnormalities	gastrointestinal tract cancer	Gastrointestinal tract cancer	3.52e-07	HOXC8,AKAP13,OSGIN2,YTHDC1,OBSCN,PIK3R5,FAAP100,NCAM2,SP8,TRIM3,CEP350,STK32A,ARNT2,LMBRD2,DESI2,TBXA2R,TSHZ3,PLEKHA8,ZNF45,HMX2,DNAI1,ARID3B,AZIN1,PHTF1,BNC2,SPOCK1,CPXM1,GYPE,SCN10A,NF2,LAMA1,CSMD1,TIAM1,ADAMTS1,GNB2,AR,APPL1,UBE4A,NRP1,MYLK,DECR1,GALNT10,EWSR1,TRIM55,TSPYL2,CCAT1,CSF2RA,SLC35A4,KCTD15,ODR4,RTTN,PER3,TG,NKTR,FIGNL1,mir-33,NOP2,ANXA3,TNFRSF8,ACSS3,AHNAK2,HCN4,CTSH,MAN2B2,SDK1,HS…	142
Cancer, Gastrointestinal Disease, Hepatic System Disease, Organismal Injury and Abnormalities	cancer	Liver cancer	5.14e-07	HOXC8,AKAP13,OSGIN2,YTHDC1,NETO1,TMEM190,ESPL1,DNAH1,OBSCN,PIK3R5,FAAP100,NCAM2,CEP350,GPER1,ARNT2,SHROOM3,CEP41,TSHZ3,AFF2,GSR,RNF216,PHTF1,POT1,BNC2,CPXM1,GYPE,EGFR,SCN10A,PLEKHO1,NF2,LAMA1,CSMD1,LRPPRC,SVEP1,PITPNM3,TIAM1,PPP1R9A,NLK,HEATR1,FRYL,ADAMTS1,ACVR1B,ANK3,AR,MYLK,DECR1,SPRR3,EWSR1,THRB,P4HB,TRIM55,C20orf194,TSPYL2,CHEK2,RET,ZNF703,SETX,RTTN,SPOPL,GRIA2,TACC2,TG,LTBP4,B4GALT4,SGTB,ANX…	84
Cancer, Gastrointestinal Disease, Hepatic System Disease, Organismal Injury and Abnormalities	hepatobiliary system cancer	Hepatobiliary system cancer	5.98e-07	HOXC8,AKAP13,OSGIN2,YTHDC1,NETO1,TMEM190,ESPL1,DNAH1,OBSCN,PIK3R5,FAAP100,NCAM2,CEP350,GPER1,ARNT2,SHROOM3,CEP41,TSHZ3,AFF2,GSR,IMPG2,FAM129A,RNF216,PHTF1,POT1,BNC2,CPXM1,GYPE,EGFR,PLEKHO1,SCN10A,NF2,LAMA1,CSMD1,LRPPRC,SVEP1,PITPNM3,TIAM1,PPP1R9A,NLK,HEATR1,TRAPPC13,FRYL,ADAMTS1,ACVR1B,ANK3,AR,MYLK,DECR1,SPRR3,EWSR1,THRB,P4HB,TRIM55,C20orf194,TSPYL2,CHEK2,RET,ZNF703,SETX,RTTN,SPOPL,GRIA2,TACC2,TG…	87
Cancer, Organismal Injury and Abnormalities, Reproductive System Disease	development	Development of genital tumor	6.33e-07	HOXC8,YTHDC1,NETO1,SATB2,ESPL1,LSR,DNAH1,OBSCN,PIK3R5,NCAM2,MYBPC1,STK32A,LMBRD2,TBXA2R,STRN3,TSHZ3,AFF2,GSR,IMPG2,ARID3B,EPYC,CTSS,SPOCK1,BNC2,EGFR,SCN10A,LMOD2,MOGAT2,NF2,CSMD1,LRPPRC,CRKL,SVEP1,TIAM1,PPP1R9A,CLEC18B,HEATR1,GNB2,ACVR1B,ANK3,AR,UBE4A,NRP1,MYLK,THRB,C20orf194,TSPYL2,CHEK2,RET,SETX,PROS1,RTTN,PER3,GRIA2,ZNF532,TG,ECE2,LTBP4,NKTR,FIGNL1,ANXA3,TNFRSF8,PKHD1L1,AHNAK2,KCNT1,DAPL1,DVL1…	81
Cancer, Organismal Injury and Abnormalities, Reproductive System Disease	breast or gynecological cancer	Breast or gynecological cancer	6.94e-07	HOXC8,AKAP13,HAX1,YTHDC1,NETO1,SATB2,ESPL1,LSR,DNAH1,OBSCN,PIK3R5,NCAM2,MYBPC1,SP8,TRIM3,STK32A,GPER1,CEP41,LMBRD2,TBXA2R,STRN3,TSHZ3,ZNF45,AFF2,GSR,IMPG2,ARID3B,EPYC,CTSS,SPOCK1,BNC2,EGFR,SCN10A,LMOD2,MOGAT2,NF2,LAMA1,CSMD1,LRPPRC,CRKL,SVEP1,TIAM1,PPP1R9A,CLEC18B,HEATR1,FRYL,ADAMTS1,GNB2,ACVR1B,ANK3,AR,UBE4A,NRP1,MYLK,THRB,P4HB,C20orf194,CHEK2,CSF2RA,RET,PCM1,ZNF703,SETX,PROS1,RTTN,PER3,GRIA2,MP…	96
Cancer, Organismal Injury and Abnormalities, Reproductive System Disease	female genital tract adenocarcinoma	Female genital tract adenocarcinoma	9.66e-07	HOXC8,YTHDC1,NETO1,SATB2,ESPL1,LSR,DNAH1,OBSCN,PIK3R5,NCAM2,MYBPC1,STK32A,LMBRD2,TBXA2R,STRN3,TSHZ3,AFF2,IMPG2,ARID3B,EPYC,SPOCK1,BNC2,EGFR,SCN10A,LMOD2,MOGAT2,NF2,CSMD1,LRPPRC,CRKL,SVEP1,PPP1R9A,HEATR1,ACVR1B,GNB2,ANK3,AR,UBE4A,NRP1,MYLK,THRB,C20orf194,CHEK2,SETX,PROS1,RTTN,PER3,GRIA2,ZNF532,TG,ECE2,LTBP4,NKTR,FIGNL1,ANXA3,TNFRSF8,PKHD1L1,AHNAK2,KCNT1,HCN4,ZKSCAN1,UBN1,SDK1,PTPRE,MAP2K2,STAP1,SL…	71
Cancer, Gastrointestinal Disease, Organismal Injury and Abnormalities	development	Development of digestive organ tumor	9.75e-07	AKAP13,OSGIN2,NETO1,SATB2,ESPL1,LSR,DNAH1,OBSCN,PIK3R5,NCAM2,SP8,CEP350,TRIM3,SPRED1,STK32A,KATNAL2,SHROOM3,DESI2,TSHZ3,AFF2,IMPG2,HMX2,DNAI1,ARID3B,AZIN1,PHTF1,CTSS,SPOCK1,BACH2,BNC2,CPXM1,GYPE,EGFR,SCN10A,LMOD2,NF2,LAMA1,CSMD1,LRPPRC,SVEP1,PITPNM3,TIAM1,PPP1R9A,NLK,HEATR1,ADAMTS1,ACVR1B,ANK3,AR,APPL1,MYLK,IGSF9,EWSR1,P4HB,TRIM55,CHEK2,CCAT1,CSF2RA,RET,PCM1,KCTD15,ODR4,SETX,PROS1,RTTN,PER3,MPP6,…	91
Cancer, Gastrointestinal Disease, Hepatic System Disease, Organismal Injury and Abnormalities	liver carcinoma	Liver carcinoma	1e-06	HOXC8,AKAP13,OSGIN2,YTHDC1,NETO1,TMEM190,ESPL1,DNAH1,OBSCN,PIK3R5,FAAP100,NCAM2,CEP350,GPER1,ARNT2,SHROOM3,CEP41,TSHZ3,AFF2,GSR,RNF216,PHTF1,POT1,BNC2,CPXM1,GYPE,EGFR,PLEKHO1,SCN10A,LAMA1,CSMD1,LRPPRC,SVEP1,PITPNM3,TIAM1,PPP1R9A,NLK,HEATR1,FRYL,ADAMTS1,ACVR1B,ANK3,AR,MYLK,DECR1,SPRR3,THRB,P4HB,TRIM55,C20orf194,TSPYL2,CHEK2,RET,ZNF703,SETX,RTTN,SPOPL,GRIA2,TACC2,TG,LTBP4,B4GALT4,SGTB,ANXA3,TUG1,PK…	81
Cancer, Gastrointestinal Disease, Organismal Injury and Abnormalities	hepatobiliary carcinoma	Hepatobiliary carcinoma	1.21e-06	HOXC8,AKAP13,OSGIN2,YTHDC1,NETO1,TMEM190,ESPL1,DNAH1,OBSCN,PIK3R5,FAAP100,NCAM2,CEP350,GPER1,ARNT2,SHROOM3,CEP41,TSHZ3,AFF2,GSR,IMPG2,FAM129A,RNF216,PHTF1,POT1,BNC2,CPXM1,GYPE,EGFR,PLEKHO1,SCN10A,LAMA1,CSMD1,LRPPRC,SVEP1,PITPNM3,TIAM1,PPP1R9A,NLK,HEATR1,TRAPPC13,FRYL,ADAMTS1,ACVR1B,ANK3,AR,MYLK,DECR1,SPRR3,THRB,P4HB,TRIM55,C20orf194,TSPYL2,CHEK2,RET,ZNF703,SETX,RTTN,SPOPL,GRIA2,TACC2,TG,LTBP4,B4G…	84
Cell Death and Survival	necrosis	Necrosis	1.23e-06	HAX1,SATB2,GPER1,DESI2,TBXA2R,TSHZ3,COMMD4,PNPLA2,GSR,RPS11,LANCL2,NUP58,RNF216,ARID3B,POT1,CTSS,SPOCK1,BACH2,EGFR,KCNRG,SCN10A,NF2,CRKL,TIAM1,PPP1R9A,CLEC18B,ADAMTS1,GNB2,ACVR1B,AR,NRP1,MYLK,DECR1,GALNT10,EWSR1,THRB,P4HB,CHEK2,CCAT1,MECP2,CSF2RA,RET,PROS1,GRIA2,PNPLA8,RPS3A,LINC00599,TUG1,TNFRSF8,DVL1,PDHA1,SPARC,KLF7,DPYSL3,PTPRE,MAP2K2,TFCP2,SLC25A12,TTN,PTMA	60
Cancer, Organismal Injury and Abnormalities, Reproductive System Disease	tumorigenesis	Tumorigenesis of reproductive tract	1.42e-06	HOXC8,YTHDC1,NETO1,SATB2,ESPL1,LSR,DNAH1,OBSCN,PIK3R5,NCAM2,MYBPC1,SP8,STK32A,LMBRD2,TBXA2R,STRN3,TSHZ3,AFF2,GSR,IMPG2,ARID3B,EPYC,CTSS,SPOCK1,BNC2,EGFR,SCN10A,LMOD2,MOGAT2,NF2,CSMD1,LRPPRC,CRKL,SVEP1,TIAM1,PPP1R9A,CLEC18B,HEATR1,GNB2,ACVR1B,ANK3,AR,UBE4A,NRP1,MYLK,THRB,C20orf194,TSPYL2,CHEK2,RET,SETX,PROS1,RTTN,PER3,GRIA2,ZNF532,TG,ECE2,LTBP4,NKTR,FIGNL1,ANXA3,TNFRSF8,PKHD1L1,AHNAK2,KCNT1,DAPL1,…	82
Cancer, Organismal Injury and Abnormalities, Reproductive System Disease	female genital neoplasm	Female genital neoplasm	1.54e-06	HOXC8,YTHDC1,NETO1,SATB2,ESPL1,LSR,DNAH1,OBSCN,PIK3R5,NCAM2,MYBPC1,SP8,STK32A,LMBRD2,TBXA2R,STRN3,TSHZ3,AFF2,GSR,IMPG2,ARID3B,EPYC,CTSS,SPOCK1,BNC2,EGFR,SCN10A,LMOD2,MOGAT2,NF2,CSMD1,LRPPRC,CRKL,SVEP1,TIAM1,PPP1R9A,CLEC18B,HEATR1,GNB2,ACVR1B,ANK3,AR,UBE4A,NRP1,MYLK,THRB,C20orf194,TSPYL2,CHEK2,RET,SETX,PROS1,RTTN,PER3,GRIA2,ZNF532,TG,ECE2,LTBP4,NKTR,FIGNL1,ANXA3,TNFRSF8,PKHD1L1,AHNAK2,KCNT1,DAPL1,…	82
Cancer, Organismal Injury and Abnormalities, Reproductive System Disease	female genital tract cancer	Female genital tract cancer	1.63e-06	HOXC8,YTHDC1,NETO1,SATB2,ESPL1,LSR,DNAH1,OBSCN,PIK3R5,NCAM2,MYBPC1,SP8,STK32A,LMBRD2,TBXA2R,STRN3,TSHZ3,AFF2,GSR,IMPG2,ARID3B,EPYC,CTSS,SPOCK1,BNC2,EGFR,SCN10A,LMOD2,MOGAT2,NF2,CSMD1,LRPPRC,CRKL,SVEP1,TIAM1,PPP1R9A,CLEC18B,HEATR1,GNB2,ACVR1B,ANK3,AR,UBE4A,NRP1,MYLK,THRB,C20orf194,CHEK2,RET,SETX,PROS1,RTTN,PER3,GRIA2,ZNF532,TG,ECE2,LTBP4,NKTR,FIGNL1,ANXA3,TNFRSF8,PKHD1L1,AHNAK2,KCNT1,DAPL1,HCN4,CT…	80
Cancer, Organismal Injury and Abnormalities	abdominal adenocarcinoma	Abdominal adenocarcinoma	1.73e-06	HOXC8,AKAP13,OSGIN2,YTHDC1,OBSCN,PIK3R5,FAAP100,NCAM2,SP8,TRIM3,CEP350,STK32A,ARNT2,LMBRD2,TBXA2R,STRN3,TSHZ3,PLEKHA8,ZNF45,HMX2,DNAI1,ARID3B,PHTF1,BNC2,SPOCK1,CPXM1,GYPE,SCN10A,NF2,LAMA1,CSMD1,TIAM1,ADAMTS1,GNB2,AR,APPL1,UBE4A,NRP1,MYLK,DECR1,GALNT10,EWSR1,TRIM55,TSPYL2,CCAT1,CSF2RA,SLC35A4,KCTD15,ODR4,RTTN,PER3,RPS3A,TG,NKTR,FIGNL1,B4GALT4,NOP2,ANXA3,TNFRSF8,ACSS3,AHNAK2,HCN4,KLF7,MAN2B2,ZKSCAN…	146
Cancer, Gastrointestinal Disease, Organismal Injury and Abnormalities	gastro-esophageal carcinoma	Gastro-esophageal carcinoma	1.74e-06	TRIM55,OSGIN2,CSF2RA,RET,OBSCN,CEP350,RTTN,TSHZ3,PER3,AFF2,PNPLA8,TG,ZNF532,PTGIR,ARID3B,ECE2,LTBP4,NKTR,SPOCK1,BNC2,SGTB,EGFR,SCN10A,LAMA1,CSMD1,CLDN18,PKHD1L1,TIAM1,ACSS3,AHNAK2,NLK,HEATR1,DVL1,ACVR1B,ANK3,AR,SDK1,DPYSL3,PTPRE,MAP2K2,TTN,EWSR1,P4HB	43
Cancer, Organismal Injury and Abnormalities	malignant neoplasm of retroperitoneum	Malignant neoplasm of retroperitoneum	2e-06	AKAP13,SATB2,ESPL1,DNAH1,OBSCN,PIK3R5,MYBPC1,TRIM3,LMBRD2,STRN3,TSHZ3,AFF2,PHTF1,POT1,CTSS,EGFR,KCNRG,SCN10A,NF2,LAMA1,CSMD1,LRPPRC,TIAM1,PPP1R9A,FRYL,ADAMTS1,ACVR1B,AR,APPL1,UBE4A,EWSR1,THRB,CHEK2,ERV3-1,CSF2RA,RET,KCTD15,PCM1,ODR4,SETX,RTTN,MPP6,TACC2,PNPLA8,RPS3A,ZNF532,TG,LTBP4,FIGNL1,NOP2,PKHD1L1,ACSS3,AHNAK2,KCNT1,SPARC,KLF7,MAN2B2,MRPL51,HSD17B4,PTPRE,MAP2K2,TTN,KLHL18	63
Cell Death and Survival	apoptosis	Apoptosis	2.17e-06	AKAP13,HAX1,SATB2,ESPL1,OBSCN,GPER1,ARNT2,DESI2,TBXA2R,PNPLA2,GSR,LANCL2,RNF216,ARID3B,POT1,CTSS,SPOCK1,BACH2,EGFR,KCNRG,PLEKHO1,NF2,LAMA1,CRKL,TIAM1,ADAMTS1,GNB2,ACVR1B,AR,APPL1,NRP1,MYLK,DECR1,GALNT10,EWSR1,THRB,P4HB,CHEK2,CCAT1,MECP2,CSF2RA,RET,SETX,GRIA2,RPS3A,LINC00599,FIGNL1,TUG1,TNFRSF8,DVL1,PDHA1,SPARC,CTSH,KLF7,PTPRE,MAP2K2,TFCP2,TTN,PTMA	59
Cancer, Organismal Injury and Abnormalities	development	Development of adenocarcinoma	2.45e-06	HOXC8,YTHDC1,NETO1,SATB2,ESPL1,LSR,DNAH1,OBSCN,PIK3R5,NCAM2,MYBPC1,STK32A,GPER1,LMBRD2,TBXA2R,STRN3,TSHZ3,AFF2,LANCL2,IMPG2,ARID3B,AZIN1,EPYC,SPOCK1,BNC2,EGFR,SCN10A,LMOD2,MOGAT2,NF2,CSMD1,LRPPRC,CRKL,SVEP1,PPP1R9A,HEATR1,GNB2,ACVR1B,ANK3,AR,UBE4A,NRP1,MYLK,IGSF9,THRB,P4HB,C20orf194,CHEK2,RET,SETX,PROS1,RTTN,PER3,SPOPL,GRIA2,ZNF532,TG,ECE2,LTBP4,NKTR,FIGNL1,NOP2,ANXA3,TNFRSF8,PKHD1L1,AHNAK2,KCNT1…	83
Cancer, Hematological Disease, Organismal Injury and Abnormalities	hematologic cancer	Hematologic cancer	2.63e-06	AKAP13,NETO1,SATB2,ESPL1,DNAH1,OBSCN,PIK3R5,CEP350,TRIM3,SPRED1,GPER1,ARNT2,SHROOM3,LMBRD2,CEP41,STRN3,TSHZ3,GSR,RPS11,LANCL2,DNAI1,AZIN1,POT1,BACH2,BNC2,EGFR,KCNRG,SCN10A,NF2,LAMA1,CSMD1,CRKL,SVEP1,HEATR1,CLEC18B,FRYL,ANK3,NRP1,SPRR3,EWSR1,TRIM55,CHEK2,CSF2RA,RET,SETX,RTTN,PER3,TACC2,RPS3A,TG,ECE2,LTBP4,NKTR,ETNK1,TNFRSF8,AHNAK2,PDHA1,SPARC,CTSH,MRPL51,PTPRE,TFCP2,TTN,SHISA9	64
Cancer, Organismal Injury and Abnormalities	genitourinary carcinoma	Genitourinary carcinoma	3.07e-06	HOXC8,AKAP13,YTHDC1,OBSCN,PIK3R5,FAAP100,NCAM2,SP8,CEP350,TRIM3,STK32A,LMBRD2,TBXA2R,STRN3,TSHZ3,ARID3B,SPOCK1,BNC2,SCN10A,NF2,LAMA1,CSMD1,TIAM1,GNB2,AR,APPL1,UBE4A,NRP1,MYLK,DECR1,GALNT10,EWSR1,TRIM55,TSPYL2,CSF2RA,RTTN,PER3,TG,LINC00599,NKTR,FIGNL1,B4GALT4,NOP2,ANXA3,TNFRSF8,ACSS3,AHNAK2,DAPL1,HCN4,CTSH,MAN2B2,ZKSCAN1,SDK1,HSD17B4,PTPRE,MAP2K2,STAP1,SLC25A12,ZNF608,ZBTB41,C12orf57,NETO1,SATB2,E…	107
Cell Morphology, Cellular Assembly and Organization, Cellular Development, Cellular Function and Maintenance, Cellular Growth and Proliferation, Nervous System Development and Function, Organismal Development, Tissue Development	neuritogenesis	Neuritogenesis	3.27e-06	AVIL,EGFR,NF2,LAMA1,CRKL,MECP2,RET,TIAM1,PPP1R9A,NCAM2,DVL1,TRIM3,ANK3,AR,KLF7,RYK,NRP1,SDK1,PTPRE,MAP2K2,DPYSL3,IGSF9	22
Cancer, Organismal Injury and Abnormalities	neoplasia	Lymphatic system tumor	3.81e-06	TRIM55,CHEK2,NETO1,CSF2RA,SATB2,ESPL1,RET,PIK3R5,CEP350,TRIM3,SPRED1,GPER1,SHROOM3,LMBRD2,CEP41,STRN3,RTTN,GSR,LANCL2,TACC2,ECE2,POT1,CTSS,BACH2,BNC2,EGFR,KCNRG,SCN10A,NF2,CSMD1,CRKL,SVEP1,TNFRSF8,CLEC18B,FRYL,SPARC,ANK3,CTSH,NRP1,MRPL51,PTPRE,TFCP2,TTN,EWSR1,SHISA9	45
Cancer, Hematological Disease, Immunological Disease, Organismal Injury and Abnormalities	lymphocytic cancer	Lymphocytic cancer	4.27e-06	TRIM55,CHEK2,NETO1,CSF2RA,SATB2,ESPL1,RET,PIK3R5,CEP350,TRIM3,SPRED1,GPER1,SHROOM3,LMBRD2,CEP41,STRN3,RTTN,GSR,LANCL2,TACC2,ECE2,POT1,BACH2,BNC2,EGFR,KCNRG,SCN10A,NF2,CRKL,SVEP1,TNFRSF8,CLEC18B,FRYL,SPARC,ANK3,CTSH,NRP1,MRPL51,PTPRE,TFCP2,TTN,EWSR1,SHISA9	43
Cancer, Hematological Disease, Organismal Injury and Abnormalities	lymphocytic neoplasm	Lymphocytic neoplasm	4.34e-06	TRIM55,CHEK2,NETO1,CSF2RA,SATB2,ESPL1,RET,PIK3R5,CEP350,TRIM3,SPRED1,GPER1,SHROOM3,LMBRD2,CEP41,STRN3,RTTN,GSR,LANCL2,TACC2,ECE2,POT1,BACH2,BNC2,EGFR,KCNRG,SCN10A,NF2,CSMD1,CRKL,SVEP1,TNFRSF8,CLEC18B,FRYL,SPARC,ANK3,CTSH,NRP1,MRPL51,PTPRE,TFCP2,TTN,EWSR1,SHISA9	44
Cancer, Hematological Disease, Immunological Disease, Organismal Injury and Abnormalities	neoplasia	Neoplasia of leukocytes	4.47e-06	TRIM55,CHEK2,NETO1,CSF2RA,SATB2,ESPL1,RET,PIK3R5,CEP350,TRIM3,SPRED1,GPER1,SHROOM3,LMBRD2,CEP41,STRN3,RTTN,GSR,LANCL2,ECE2,POT1,BACH2,BNC2,EGFR,KCNRG,SCN10A,NF2,CSMD1,CRKL,SVEP1,ETNK1,TNFRSF8,CLEC18B,FRYL,SPARC,ANK3,CTSH,NRP1,MRPL51,PTPRE,TFCP2,TTN,EWSR1,SHISA9	44
Hematological Disease, Immunological Disease	lymphoproliferative disorder	Lymphoproliferative disorder	4.69e-06	TRIM55,CHEK2,NETO1,CSF2RA,SATB2,ESPL1,RET,PIK3R5,CEP350,TRIM3,SPRED1,GPER1,SHROOM3,LMBRD2,CEP41,STRN3,RTTN,GSR,LANCL2,TACC2,ECE2,POT1,BACH2,BNC2,EGFR,KCNRG,SCN10A,NF2,CSMD1,CRKL,SVEP1,TNFRSF8,CLEC18B,FRYL,SPARC,ANK3,CTSH,NRP1,MRPL51,PTPRE,TFCP2,TTN,EWSR1,SHISA9	44
Cancer, Hematological Disease, Organismal Injury and Abnormalities	hematologic cancer	Hematologic cancer of cells	4.88e-06	TRIM55,CHEK2,NETO1,CSF2RA,SATB2,ESPL1,RET,PIK3R5,CEP350,TRIM3,SPRED1,GPER1,SHROOM3,LMBRD2,CEP41,STRN3,RTTN,GSR,LANCL2,ECE2,POT1,BACH2,BNC2,EGFR,KCNRG,SCN10A,NF2,CRKL,SVEP1,TNFRSF8,CLEC18B,FRYL,SPARC,ANK3,CTSH,NRP1,MRPL51,PTPRE,TFCP2,TTN,EWSR1,SHISA9	42
Cancer, Gastrointestinal Disease, Organismal Injury and Abnormalities	gastroesophageal cancer	Gastroesophageal cancer	5.3e-06	TRIM55,OSGIN2,CCAT1,CSF2RA,RET,OBSCN,CEP350,RTTN,TSHZ3,PER3,AFF2,PNPLA8,TG,ZNF532,PTGIR,ARID3B,ECE2,LTBP4,NKTR,SPOCK1,BNC2,SGTB,EGFR,SCN10A,LAMA1,CSMD1,CLDN18,PKHD1L1,TIAM1,ACSS3,AHNAK2,NLK,HEATR1,DVL1,ACVR1B,ANK3,AR,SDK1,DPYSL3,PTPRE,MAP2K2,TTN,EWSR1,P4HB	44
Cancer, Organismal Injury and Abnormalities	lymphoid cancer	Lymphoid cancer	5.82e-06	TRIM55,CHEK2,NETO1,CSF2RA,SATB2,ESPL1,RET,PIK3R5,CEP350,TRIM3,SPRED1,GPER1,SHROOM3,LMBRD2,CEP41,STRN3,RTTN,GSR,LANCL2,TACC2,ECE2,POT1,BACH2,BNC2,EGFR,KCNRG,SCN10A,NF2,CSMD1,CRKL,SVEP1,TNFRSF8,CLEC18B,FRYL,SPARC,ANK3,CTSH,NRP1,MRPL51,PTPRE,TFCP2,TTN,EWSR1,SHISA9	44
Cancer, Organismal Injury and Abnormalities	genitourinary tumor	Genitourinary tumor	5.91e-06	HOXC8,AKAP13,YTHDC1,OBSCN,PIK3R5,FAAP100,NCAM2,SP8,TRIM3,CEP350,STK32A,LMBRD2,CEP41,TBXA2R,STRN3,TSHZ3,PLEKHA8,ZNF45,ARID3B,BNC2,SPOCK1,SCN10A,LAMA1,NF2,CSMD1,TIAM1,ADAMTS1,GNB2,AR,APPL1,UBE4A,NRP1,MYLK,DECR1,GALNT10,EWSR1,TRIM55,TSPYL2,CSF2RA,SLC35A4,RTTN,PER3,TG,LINC00599,NKTR,FIGNL1,B4GALT4,NOP2,ANXA3,TNFRSF8,ACSS3,AHNAK2,DAPL1,HCN4,CTSH,MAN2B2,ZKSCAN1,SDK1,HSD17B4,PTPRE,MAP2K2,STAP1,SLC25A12,…	120
Cancer, Gastrointestinal Disease, Organismal Injury and Abnormalities	colon carcinoma	Colon carcinoma	6.03e-06	AKAP13,OSGIN2,NETO1,ESPL1,LSR,DNAH1,OBSCN,PIK3R5,NCAM2,SP8,CEP350,TRIM3,SPRED1,STK32A,KATNAL2,SHROOM3,DESI2,TSHZ3,AFF2,IMPG2,HMX2,DNAI1,ARID3B,PHTF1,BACH2,BNC2,CPXM1,GYPE,EGFR,LMOD2,NF2,LAMA1,CSMD1,LRPPRC,SVEP1,PITPNM3,NLK,HEATR1,ADAMTS1,ACVR1B,ANK3,AR,APPL1,MYLK,IGSF9,CHEK2,CCAT1,CSF2RA,RET,PCM1,KCTD15,ODR4,SETX,PROS1,RTTN,MPP6,TACC2,ZNF532,TG,ECE2,LTBP4,NKTR,TNFRSF8,PKHD1L1,AHNAK2,KCNT1,PDHA1,H…	78
Cancer, Organismal Injury and Abnormalities	extracranial solid tumor	Extracranial solid tumor	6.64e-06	HOXC8,AKAP13,OSGIN2,YTHDC1,OBSCN,PIK3R5,FAAP100,NCAM2,SP8,TRIM3,CEP350,STK32A,ARNT2,LMBRD2,CEP41,DESI2,TBXA2R,STRN3,TSHZ3,PLEKHA8,ZNF45,RPS11,LANCL2,HMX2,DNAI1,ARID3B,AZIN1,PHTF1,BNC2,SPOCK1,CPXM1,GYPE,SCN10A,NF2,LAMA1,CSMD1,TIAM1,ADAMTS1,GNB2,AR,APPL1,UBE4A,NRP1,MYLK,DECR1,GALNT10,SPRR3,EWSR1,TRIM55,TSPYL2,CCAT1,CSF2RA,SLC35A4,KCTD15,ODR4,RTTN,PER3,RPS3A,TG,LINC00599,NKTR,FIGNL1,B4GALT4,mir-33,N…	166
Cancer, Organismal Injury and Abnormalities	melanoma	Melanoma	6.91e-06	AKAP13,OSGIN2,YTHDC1,OBSCN,PIK3R5,FAAP100,NCAM2,CEP350,TRIM3,STK32A,ARNT2,LMBRD2,TSHZ3,PLEKHA8,RPS11,DNAI1,ARID3B,AZIN1,PHTF1,BNC2,CPXM1,SCN10A,NF2,LAMA1,CSMD1,TIAM1,ADAMTS1,AR,APPL1,UBE4A,NRP1,MYLK,DECR1,GALNT10,SPRR3,EWSR1,TRIM55,TSPYL2,CSF2RA,SLC35A4,ODR4,PER3,TG,NKTR,FIGNL1,ANXA3,TNFRSF8,ACSS3,AHNAK2,HCN4,MAN2B2,SDK1,HSD17B4,PTPRE,MAP2K2,TFCP2,STAP1,SLC25A12,ZNF608,HAX1,NETO1,SATB2,ESPL1,LSR,…	116
Cancer, Organismal Injury and Abnormalities	malignant solid tumor	Malignant solid tumor	7.08e-06	HOXC8,AKAP13,OSGIN2,YTHDC1,OBSCN,PIK3R5,FAAP100,NCAM2,SP8,TRIM3,CEP350,STK32A,ARNT2,LMBRD2,CEP41,DESI2,TBXA2R,STRN3,TSHZ3,PLEKHA8,ZNF45,RPS11,LANCL2,HMX2,DNAI1,ARID3B,AZIN1,PHTF1,BNC2,SPOCK1,CPXM1,GYPE,SCN10A,NF2,LAMA1,CSMD1,TIAM1,ADAMTS1,GNB2,AR,APPL1,UBE4A,NRP1,MYLK,DECR1,GALNT10,SPRR3,EWSR1,TRIM55,TSPYL2,CCAT1,CSF2RA,SLC35A4,KCTD15,ODR4,RTTN,PER3,RPS3A,TG,LINC00599,NKTR,FIGNL1,B4GALT4,mir-33,N…	166
Cardiovascular System Development and Function, Organ Development	heart rate	Heart rate	7.11e-06	EGFR,SCN10A,HAX1,LMOD2,MECP2,HCN4,ANK3,PNPLA2,MYLK,PNPLA8,TTN,TG,THRB	13
Cancer, Organismal Injury and Abnormalities	extraadrenal retroperitoneal tumor	Extraadrenal retroperitoneal tumor	7.26e-06	AKAP13,SATB2,ESPL1,DNAH1,OBSCN,PIK3R5,MYBPC1,TRIM3,LMBRD2,STRN3,TSHZ3,AFF2,PHTF1,POT1,CTSS,BNC2,EGFR,KCNRG,SCN10A,LMOD2,NF2,LAMA1,CSMD1,LRPPRC,TIAM1,PPP1R9A,FRYL,ADAMTS1,ACVR1B,AR,APPL1,UBE4A,NRP1,EWSR1,THRB,CHEK2,ERV3-1,CSF2RA,RET,KCTD15,PCM1,ODR4,SETX,RTTN,MPP6,TACC2,PNPLA8,RPS3A,ZNF532,TG,LTBP4,FIGNL1,NOP2,PKHD1L1,ACSS3,AHNAK2,KCNT1,SPARC,KLF7,MAN2B2,MRPL51,HSD17B4,PTPRE,MAP2K2,TTN,KLHL18	66
Cancer, Organismal Injury and Abnormalities	cancer	Cancer of secretory structure	7.31e-06	AKAP13,OSGIN2,YTHDC1,OBSCN,PIK3R5,FAAP100,NCAM2,SP8,TRIM3,CEP350,STK32A,ARNT2,LMBRD2,STRN3,TBXA2R,TSHZ3,PLEKHA8,ZNF45,RPS11,HMX2,ARID3B,AZIN1,PHTF1,BNC2,SPOCK1,CPXM1,SCN10A,NF2,LAMA1,CSMD1,TIAM1,ADAMTS1,GNB2,AR,APPL1,UBE4A,NRP1,MYLK,DECR1,GALNT10,SPRR3,EWSR1,TRIM55,TSPYL2,CSF2RA,SLC35A4,KCTD15,ODR4,RTTN,PER3,RPS3A,TG,NKTR,FIGNL1,B4GALT4,NOP2,ANXA3,TNFRSF8,ACSS3,AHNAK2,HCN4,CTSH,KLF7,MAN2B2,ZKSCAN…	143
Cancer, Organismal Injury and Abnormalities	malignant genitourinary solid tumor	Malignant genitourinary solid tumor	7.39e-06	HOXC8,AKAP13,YTHDC1,OBSCN,PIK3R5,FAAP100,NCAM2,SP8,CEP350,TRIM3,STK32A,LMBRD2,CEP41,TBXA2R,STRN3,TSHZ3,PLEKHA8,ZNF45,ARID3B,SPOCK1,BNC2,SCN10A,NF2,LAMA1,CSMD1,TIAM1,ADAMTS1,GNB2,AR,APPL1,UBE4A,NRP1,MYLK,DECR1,GALNT10,EWSR1,TRIM55,TSPYL2,CSF2RA,SLC35A4,RTTN,PER3,TG,LINC00599,NKTR,FIGNL1,B4GALT4,NOP2,ANXA3,TNFRSF8,ACSS3,AHNAK2,DAPL1,HCN4,CTSH,MAN2B2,ZKSCAN1,SDK1,HSD17B4,PTPRE,MAP2K2,STAP1,SLC25A12,…	118
Cancer, Gastrointestinal Disease, Organismal Injury and Abnormalities	colorectal carcinomagenesis	Colorectal carcinoma	9.93e-06	AKAP13,OSGIN2,NETO1,SATB2,ESPL1,LSR,DNAH1,OBSCN,PIK3R5,NCAM2,SP8,CEP350,TRIM3,SPRED1,STK32A,KATNAL2,SHROOM3,DESI2,TSHZ3,AFF2,IMPG2,HMX2,DNAI1,ARID3B,PHTF1,BACH2,BNC2,CPXM1,GYPE,EGFR,LMOD2,NF2,LAMA1,CSMD1,LRPPRC,SVEP1,PITPNM3,PPP1R9A,NLK,HEATR1,ADAMTS1,ACVR1B,ANK3,AR,APPL1,MYLK,IGSF9,CHEK2,CCAT1,CSF2RA,RET,PCM1,KCTD15,ODR4,SETX,PROS1,RTTN,MPP6,TACC2,ZNF532,TG,ECE2,LTBP4,NKTR,TNFRSF8,PKHD1L1,AHNAK2…	80
Cancer, Gastrointestinal Disease, Organismal Injury and Abnormalities	gastric epithelial cancer	Gastric carcinoma	1e-05	TRIM55,OSGIN2,CSF2RA,RET,OBSCN,RTTN,PER3,AFF2,TG,ZNF532,ECE2,LTBP4,NKTR,SPOCK1,BNC2,SGTB,EGFR,SCN10A,LAMA1,CSMD1,CLDN18,PKHD1L1,TIAM1,AHNAK2,NLK,HEATR1,ACVR1B,ANK3,AR,SDK1,MAP2K2,TTN,EWSR1,P4HB	34
Cancer, Endocrine System Disorders, Gastrointestinal Disease, Organismal Injury and Abnormalities	pancreatic cancer	Pancreatic cancer	1.03e-05	AKAP13,SATB2,ESPL1,DNAH1,OBSCN,PIK3R5,MYBPC1,TRIM3,LMBRD2,AFF2,PHTF1,POT1,CTSS,EGFR,KCNRG,SCN10A,NF2,LAMA1,CSMD1,LRPPRC,TIAM1,PPP1R9A,FRYL,ADAMTS1,ACVR1B,AR,APPL1,ERV3-1,CSF2RA,RET,KCTD15,PCM1,ODR4,SETX,RTTN,MPP6,TACC2,PNPLA8,RPS3A,TG,LTBP4,FIGNL1,NOP2,ACSS3,AHNAK2,KCNT1,KLF7,MAN2B2,MAP2K2,TTN	50
Cancer, Gastrointestinal Disease, Organismal Injury and Abnormalities	colorectal neoplasia	Colorectal tumor	1.04e-05	AKAP13,OSGIN2,NETO1,SATB2,ESPL1,LSR,DNAH1,OBSCN,PIK3R5,NCAM2,SP8,CEP350,TRIM3,SPRED1,STK32A,KATNAL2,SHROOM3,DESI2,TSHZ3,AFF2,IMPG2,HMX2,DNAI1,ARID3B,PHTF1,BACH2,BNC2,CPXM1,GYPE,EGFR,SCN10A,LMOD2,NF2,LAMA1,CSMD1,LRPPRC,SVEP1,PITPNM3,PPP1R9A,NLK,HEATR1,ADAMTS1,ACVR1B,ANK3,AR,APPL1,UBE4A,NRP1,MYLK,IGSF9,EWSR1,P4HB,CHEK2,CCAT1,CSF2RA,RET,PCM1,KCTD15,ODR4,SETX,PROS1,RTTN,MPP6,TACC2,ZNF532,TG,ECE2,LTBP…	89
Cancer, Hematological Disease, Immunological Disease, Organismal Injury and Abnormalities	leukemia	Leukemia	1.07e-05	AKAP13,CHEK2,NETO1,CSF2RA,RET,DNAH1,OBSCN,TRIM3,SPRED1,SETX,GPER1,ARNT2,LMBRD2,CEP41,STRN3,TSHZ3,PER3,GSR,RPS11,TACC2,RPS3A,DNAI1,TG,AZIN1,LTBP4,POT1,NKTR,BACH2,BNC2,EGFR,SCN10A,LAMA1,CSMD1,SVEP1,ETNK1,TNFRSF8,AHNAK2,HEATR1,CLEC18B,PDHA1,FRYL,ANK3,NRP1,MRPL51,PTPRE,SPRR3,TTN	47
Cancer, Organismal Injury and Abnormalities	head and neck cancer	Head and neck cancer	1.33e-05	HOXC8,AKAP13,OSGIN2,YTHDC1,OBSCN,PIK3R5,FAAP100,NCAM2,SP8,TRIM3,CEP350,STK32A,ARNT2,LMBRD2,TBXA2R,STRN3,TSHZ3,PLEKHA8,ZNF45,RPS11,HMX2,ARID3B,AZIN1,PHTF1,BNC2,SPOCK1,CPXM1,SCN10A,NF2,LAMA1,CSMD1,TIAM1,ADAMTS1,GNB2,AR,APPL1,UBE4A,NRP1,MYLK,DECR1,GALNT10,SPRR3,EWSR1,TSPYL2,CCAT1,CSF2RA,KCTD15,ODR4,RTTN,PER3,RPS3A,TG,NKTR,TNFRSF8,ACSS3,AHNAK2,HCN4,CTSH,KLF7,MAN2B2,SDK1,HSD17B4,PTPRE,MAP2K2,TFCP2,STA…	137
Cancer, Gastrointestinal Disease, Organismal Injury and Abnormalities	pancreatobiliary tumor	Pancreatobiliary tumor	1.4e-05	AKAP13,SATB2,ESPL1,DNAH1,OBSCN,PIK3R5,MYBPC1,TRIM3,LMBRD2,GSR,AFF2,IMPG2,FAM129A,PHTF1,POT1,CTSS,BNC2,EGFR,KCNRG,SCN10A,LMOD2,NF2,LAMA1,CSMD1,LRPPRC,SVEP1,TIAM1,PPP1R9A,TRAPPC13,FRYL,ADAMTS1,ACVR1B,ANK3,AR,APPL1,NRP1,ERV3-1,CSF2RA,RET,KCTD15,PCM1,ODR4,SETX,RTTN,MPP6,TACC2,PNPLA8,RPS3A,TG,LTBP4,FIGNL1,NOP2,ACSS3,AHNAK2,KCNT1,KLF7,MAN2B2,MAP2K2,TTN,ZBTB41	60
Cancer, Gastrointestinal Disease, Hepatic System Disease, Organismal Injury and Abnormalities	liver tumor	Liver tumor	1.5e-05	HOXC8,AKAP13,OSGIN2,YTHDC1,NETO1,TMEM190,ESPL1,DNAH1,OBSCN,PIK3R5,FAAP100,NCAM2,SP8,CEP350,GPER1,ARNT2,SHROOM3,CEP41,TSHZ3,AFF2,GSR,RNF216,EPYC,PHTF1,POT1,BNC2,CPXM1,GYPE,EGFR,PLEKHO1,SCN10A,NF2,LAMA1,CSMD1,LRPPRC,SVEP1,PITPNM3,TIAM1,PPP1R9A,NLK,HEATR1,FRYL,ADAMTS1,ACVR1B,ANK3,AR,MYLK,DECR1,GALNT10,SPRR3,EWSR1,THRB,P4HB,TRIM55,C20orf194,TSPYL2,CHEK2,CIR1,RET,ZNF703,SETX,RTTN,SPOPL,GRIA2,TACC2,RPS…	89
Cancer, Organismal Injury and Abnormalities, Reproductive System Disease	genital tumor	Genital tumor	1.55e-05	HOXC8,AKAP13,YTHDC1,OBSCN,PIK3R5,FAAP100,NCAM2,SP8,TRIM3,STK32A,LMBRD2,TBXA2R,STRN3,TSHZ3,PLEKHA8,ARID3B,SPOCK1,BNC2,SCN10A,NF2,LAMA1,CSMD1,TIAM1,GNB2,AR,APPL1,UBE4A,NRP1,MYLK,GALNT10,EWSR1,TRIM55,TSPYL2,CSF2RA,SLC35A4,RTTN,PER3,TG,LINC00599,NKTR,FIGNL1,B4GALT4,ANXA3,TNFRSF8,AHNAK2,DAPL1,HCN4,CTSH,ZKSCAN1,SDK1,HSD17B4,PTPRE,MAP2K2,STAP1,SLC25A12,ZNF608,ZBTB41,NETO1,SATB2,ESPL1,LSR,DNAH1,MYBPC1,SH…	103
Cancer, Organismal Injury and Abnormalities	ductal carcinoma	Ductal carcinoma	1.58e-05	AKAP13,SATB2,ESPL1,DNAH1,OBSCN,PIK3R5,MYBPC1,TRIM3,LMBRD2,GSR,AFF2,IMPG2,FAM129A,PHTF1,POT1,EGFR,KCNRG,SCN10A,NF2,LAMA1,CSMD1,LRPPRC,SVEP1,TIAM1,PPP1R9A,TRAPPC13,FRYL,ACVR1B,ANK3,AR,APPL1,ERV3-1,RET,PCM1,ZNF703,ODR4,SETX,RTTN,MPP6,TACC2,PNPLA8,RPS3A,TG,LTBP4,FIGNL1,NOP2,ACSS3,AHNAK2,KCNT1,KLF7,MAN2B2,PTPRE,TTN,ZBTB41	54
Cancer, Organismal Injury and Abnormalities	pelvic tumor	Pelvic tumor	1.76e-05	HOXC8,AKAP13,YTHDC1,OBSCN,PIK3R5,FAAP100,NCAM2,SP8,CEP350,TRIM3,STK32A,LMBRD2,TBXA2R,STRN3,TSHZ3,PLEKHA8,ARID3B,SPOCK1,BNC2,SCN10A,NF2,LAMA1,CSMD1,TIAM1,GNB2,AR,APPL1,UBE4A,NRP1,MYLK,DECR1,GALNT10,EWSR1,TRIM55,TSPYL2,CSF2RA,SLC35A4,RTTN,PER3,TG,NKTR,FIGNL1,B4GALT4,ANXA3,TNFRSF8,ACSS3,AHNAK2,DAPL1,HCN4,CTSH,MAN2B2,ZKSCAN1,SDK1,HSD17B4,PTPRE,MAP2K2,STAP1,SLC25A12,ZNF608,ZBTB41,C12orf57,NETO1,SATB2,…	108
Cancer, Organismal Injury and Abnormalities	head and neck carcinoma	Head and neck carcinoma	1.86e-05	HOXC8,AKAP13,OSGIN2,YTHDC1,OBSCN,PIK3R5,FAAP100,NCAM2,SP8,TRIM3,CEP350,STK32A,ARNT2,LMBRD2,TBXA2R,STRN3,TSHZ3,PLEKHA8,ZNF45,RPS11,HMX2,ARID3B,AZIN1,PHTF1,BNC2,SPOCK1,CPXM1,SCN10A,NF2,LAMA1,CSMD1,TIAM1,ADAMTS1,GNB2,AR,APPL1,UBE4A,NRP1,MYLK,DECR1,GALNT10,SPRR3,EWSR1,TSPYL2,CCAT1,KCTD15,ODR4,RTTN,PER3,RPS3A,TG,NKTR,TNFRSF8,ACSS3,AHNAK2,HCN4,CTSH,KLF7,MAN2B2,SDK1,HSD17B4,PTPRE,MAP2K2,TFCP2,STAP1,SLC2…	136
Cancer, Gastrointestinal Disease, Organismal Injury and Abnormalities	colorectal cancer	Colorectal cancer	1.98e-05	AKAP13,OSGIN2,NETO1,SATB2,ESPL1,LSR,DNAH1,OBSCN,PIK3R5,NCAM2,SP8,CEP350,TRIM3,SPRED1,STK32A,KATNAL2,SHROOM3,DESI2,TSHZ3,AFF2,IMPG2,HMX2,DNAI1,ARID3B,PHTF1,BACH2,BNC2,CPXM1,GYPE,EGFR,SCN10A,LMOD2,NF2,LAMA1,CSMD1,LRPPRC,SVEP1,PITPNM3,PPP1R9A,NLK,HEATR1,ADAMTS1,ACVR1B,ANK3,AR,APPL1,UBE4A,NRP1,MYLK,IGSF9,EWSR1,P4HB,CHEK2,CCAT1,CSF2RA,RET,PCM1,KCTD15,ODR4,SETX,PROS1,RTTN,MPP6,TACC2,ZNF532,TG,ECE2,LTBP…	87
Cancer, Organismal Injury and Abnormalities	genitourinary adenocarcinoma	Genitourinary adenocarcinoma	2.01e-05	HOXC8,AKAP13,YTHDC1,NETO1,SATB2,ESPL1,LSR,DNAH1,OBSCN,PIK3R5,FAAP100,NCAM2,MYBPC1,TRIM3,STK32A,SHROOM3,LMBRD2,TBXA2R,STRN3,TSHZ3,AFF2,GSR,IMPG2,RNF216,ARID3B,EPYC,SPOCK1,BNC2,EGFR,SCN10A,LMOD2,MOGAT2,NF2,LAMA1,CSMD1,LRPPRC,CRKL,SVEP1,TIAM1,PPP1R9A,HEATR1,FRYL,GNB2,ACVR1B,ANK3,AR,APPL1,UBE4A,NRP1,MYLK,GALNT10,EWSR1,THRB,TRIM55,C20orf194,CHEK2,CSF2RA,RET,SETX,PROS1,RTTN,PER3,GRIA2,TACC2,PNPLA8,ZNF5…	95
Cancer, Endocrine System Disorders, Organismal Injury and Abnormalities	endocrine carcinoma	Endocrine carcinoma	2.02e-05	AKAP13,OSGIN2,YTHDC1,OBSCN,PIK3R5,FAAP100,NCAM2,SP8,TRIM3,CEP350,STK32A,ARNT2,LMBRD2,CEP41,TBXA2R,STRN3,ZNF45,TSHZ3,PLEKHA8,RPS11,HMX2,ARID3B,AZIN1,PHTF1,BNC2,SPOCK1,CPXM1,SCN10A,NF2,LAMA1,CSMD1,TIAM1,ADAMTS1,GNB2,AR,APPL1,UBE4A,NRP1,MYLK,DECR1,GALNT10,SPRR3,EWSR1,TSPYL2,KCTD15,ODR4,RTTN,PER3,RPS3A,TG,NKTR,TNFRSF8,ACSS3,AHNAK2,HCN4,CTSH,KLF7,MAN2B2,SDK1,HSD17B4,PTPRE,MAP2K2,TFCP2,STAP1,PTMA,ZNF60…	131
Gastrointestinal Disease, Hepatic System Disease, Organismal Injury and Abnormalities	liver lesion	Liver lesion	2.03e-05	HOXC8,AKAP13,OSGIN2,YTHDC1,NETO1,TMEM190,ESPL1,DNAH1,OBSCN,PIK3R5,FAAP100,NCAM2,SP8,CEP350,GPER1,ARNT2,SHROOM3,CEP41,TSHZ3,AFF2,GSR,RNF216,EPYC,PHTF1,POT1,BNC2,CPXM1,GYPE,EGFR,PLEKHO1,SCN10A,NF2,LAMA1,CSMD1,LRPPRC,SVEP1,PITPNM3,TIAM1,PPP1R9A,NLK,HEATR1,FRYL,ADAMTS1,ACVR1B,ANK3,AR,MYLK,DECR1,GALNT10,SPRR3,EWSR1,THRB,P4HB,TRIM55,C20orf194,TSPYL2,CHEK2,CIR1,CSF2RA,RET,ZNF703,SETX,PROS1,RTTN,SPOPL,GR…	91
Cancer, Organismal Injury and Abnormalities	breast or colorectal cancer	Breast or colorectal cancer	2.12e-05	AKAP13,OSGIN2,OBSCN,PIK3R5,NCAM2,SP8,CEP350,TRIM3,STK32A,CEP41,DESI2,STRN3,TSHZ3,ZNF45,HMX2,DNAI1,ARID3B,PHTF1,BNC2,CPXM1,GYPE,SCN10A,NF2,LAMA1,CSMD1,ADAMTS1,AR,APPL1,UBE4A,NRP1,MYLK,EWSR1,CCAT1,CSF2RA,KCTD15,ODR4,RTTN,TG,NKTR,mir-33,ANXA3,TNFRSF8,AHNAK2,HCN4,MAN2B2,SDK1,PTPRE,MAP2K2,TFCP2,SLC25A12,PTMA,ZBTB41,HAX1,NETO1,SATB2,ESPL1,LSR,DNAH1,SPRED1,KATNAL2,GPER1,SHROOM3,AFF2,GSR,IMPG2,BACH2,EGFR…	99
Cancer, Endocrine System Disorders, Gastrointestinal Disease, Organismal Injury and Abnormalities	carcinoma	Pancreatic carcinoma	2.28e-05	AKAP13,ERV3-1,SATB2,ESPL1,RET,DNAH1,OBSCN,PIK3R5,KCTD15,PCM1,MYBPC1,TRIM3,ODR4,SETX,LMBRD2,RTTN,AFF2,MPP6,TACC2,PNPLA8,RPS3A,TG,PHTF1,LTBP4,POT1,CTSS,FIGNL1,EGFR,KCNRG,SCN10A,LAMA1,CSMD1,LRPPRC,NOP2,TIAM1,PPP1R9A,ACSS3,AHNAK2,KCNT1,FRYL,ACVR1B,AR,APPL1,KLF7,MAN2B2,MAP2K2,TTN	47
Cancer, Organismal Injury and Abnormalities, Reproductive System Disease	genital tract cancer	Genital tract cancer	2.36e-05	HOXC8,AKAP13,YTHDC1,OBSCN,PIK3R5,FAAP100,NCAM2,SP8,TRIM3,STK32A,LMBRD2,TBXA2R,STRN3,TSHZ3,PLEKHA8,ARID3B,SPOCK1,BNC2,SCN10A,NF2,LAMA1,CSMD1,TIAM1,GNB2,AR,APPL1,UBE4A,NRP1,MYLK,GALNT10,EWSR1,TRIM55,TSPYL2,CSF2RA,SLC35A4,RTTN,PER3,TG,LINC00599,NKTR,FIGNL1,B4GALT4,ANXA3,TNFRSF8,AHNAK2,DAPL1,HCN4,CTSH,ZKSCAN1,SDK1,HSD17B4,PTPRE,MAP2K2,STAP1,SLC25A12,ZNF608,ZBTB41,NETO1,SATB2,ESPL1,LSR,DNAH1,MYBPC1,SH…	101
Cancer, Gastrointestinal Disease, Organismal Injury and Abnormalities	gastric adenocarcinoma	Gastric adenocarcinoma	2.4e-05	TRIM55,OSGIN2,CSF2RA,RET,RTTN,PER3,AFF2,TG,ZNF532,ECE2,LTBP4,NKTR,SPOCK1,BNC2,SGTB,EGFR,SCN10A,LAMA1,CSMD1,CLDN18,PKHD1L1,TIAM1,AHNAK2,NLK,HEATR1,ACVR1B,ANK3,AR,SDK1,MAP2K2,TTN,EWSR1	32
Cancer, Organismal Injury and Abnormalities, Renal and Urological Disease	urinary tract tumor	Urinary tract tumor	2.43e-05	AKAP13,C12orf57,CHEK2,CSF2RA,RET,OBSCN,PIK3R5,MYBPC1,CEP350,SETX,TBXA2R,STRN3,RTTN,TSHZ3,TACC2,ZNF532,ECE2,NKTR,EGFR,SCN10A,NF2,CSMD1,LRPPRC,NOP2,PKHD1L1,TIAM1,ACSS3,AHNAK2,KCNT1,SPARC,ACVR1B,AR,UBE4A,MAN2B2,UBN1,SDK1,MRPL51,HSD17B4,PTPRE,DECR1,TTN,EWSR1,ZNF608,KLHL18,THRB	45
Cancer, Gastrointestinal Disease, Organismal Injury and Abnormalities	colon adenocarcinoma	Colon adenocarcinoma	2.65e-05	AKAP13,OSGIN2,NETO1,ESPL1,LSR,DNAH1,OBSCN,PIK3R5,NCAM2,SP8,CEP350,TRIM3,SPRED1,STK32A,KATNAL2,SHROOM3,TSHZ3,AFF2,IMPG2,HMX2,DNAI1,ARID3B,PHTF1,BACH2,BNC2,CPXM1,GYPE,EGFR,LMOD2,NF2,LAMA1,CSMD1,LRPPRC,SVEP1,PITPNM3,NLK,HEATR1,ADAMTS1,ACVR1B,ANK3,AR,APPL1,IGSF9,CHEK2,CCAT1,CSF2RA,RET,PCM1,KCTD15,ODR4,SETX,PROS1,RTTN,MPP6,TACC2,ZNF532,TG,ECE2,LTBP4,NKTR,TNFRSF8,PKHD1L1,AHNAK2,KCNT1,PDHA1,HCN4,MAN2B2,…	75
Cancer, Endocrine System Disorders, Organismal Injury and Abnormalities	endocrine gland tumor	Endocrine gland tumor	2.73e-05	AKAP13,OSGIN2,YTHDC1,OBSCN,PIK3R5,FAAP100,NCAM2,SP8,TRIM3,CEP350,STK32A,ARNT2,LMBRD2,CEP41,TBXA2R,STRN3,TSHZ3,PLEKHA8,ZNF45,RPS11,HMX2,ARID3B,AZIN1,PHTF1,BNC2,SPOCK1,CPXM1,SCN10A,NF2,LAMA1,CSMD1,TIAM1,ADAMTS1,GNB2,AR,APPL1,UBE4A,NRP1,MYLK,DECR1,GALNT10,SPRR3,EWSR1,TSPYL2,KCTD15,ODR4,RTTN,PER3,RPS3A,TG,NKTR,TNFRSF8,ACSS3,AHNAK2,HCN4,CTSH,KLF7,MAN2B2,SDK1,HSD17B4,PTPRE,MAP2K2,TFCP2,STAP1,PTMA,ZNF60…	132
Cancer, Organismal Injury and Abnormalities	pelvic cancer	Pelvic cancer	2.73e-05	HOXC8,AKAP13,YTHDC1,OBSCN,PIK3R5,FAAP100,NCAM2,SP8,CEP350,TRIM3,STK32A,LMBRD2,TBXA2R,STRN3,TSHZ3,PLEKHA8,ARID3B,SPOCK1,BNC2,SCN10A,NF2,LAMA1,CSMD1,TIAM1,GNB2,AR,APPL1,UBE4A,NRP1,MYLK,DECR1,GALNT10,EWSR1,TRIM55,TSPYL2,CSF2RA,SLC35A4,RTTN,PER3,TG,NKTR,FIGNL1,B4GALT4,ANXA3,TNFRSF8,ACSS3,AHNAK2,DAPL1,HCN4,CTSH,MAN2B2,ZKSCAN1,SDK1,HSD17B4,PTPRE,MAP2K2,STAP1,SLC25A12,ZNF608,ZBTB41,C12orf57,NETO1,SATB2,…	106
Cancer, Gastrointestinal Disease, Organismal Injury and Abnormalities	gastroesophageal adenocarcinoma	Gastroesophageal adenocarcinoma	2.81e-05	TRIM55,OSGIN2,CSF2RA,RET,RTTN,TSHZ3,PER3,AFF2,TG,ZNF532,PTGIR,ARID3B,ECE2,LTBP4,NKTR,SPOCK1,BNC2,SGTB,EGFR,SCN10A,LAMA1,CSMD1,CLDN18,PKHD1L1,TIAM1,ACSS3,AHNAK2,NLK,HEATR1,ACVR1B,ANK3,AR,SDK1,PTPRE,MAP2K2,TTN,EWSR1	37
Cancer, Endocrine System Disorders, Gastrointestinal Disease, Organismal Injury and Abnormalities	pancreatic adenocarcinoma	Pancreatic adenocarcinoma	2.82e-05	AKAP13,ERV3-1,SATB2,ESPL1,RET,DNAH1,OBSCN,PIK3R5,PCM1,MYBPC1,TRIM3,ODR4,SETX,LMBRD2,RTTN,AFF2,MPP6,TACC2,PNPLA8,RPS3A,TG,PHTF1,LTBP4,POT1,FIGNL1,EGFR,KCNRG,SCN10A,LAMA1,CSMD1,LRPPRC,NOP2,TIAM1,PPP1R9A,ACSS3,AHNAK2,KCNT1,FRYL,ACVR1B,AR,APPL1,KLF7,MAN2B2,MAP2K2,TTN	45
Cancer, Gastrointestinal Disease, Organismal Injury and Abnormalities	colon tumor	Colon tumor	2.86e-05	AKAP13,OSGIN2,NETO1,ESPL1,LSR,DNAH1,OBSCN,PIK3R5,NCAM2,SP8,CEP350,TRIM3,SPRED1,STK32A,KATNAL2,SHROOM3,DESI2,TSHZ3,AFF2,IMPG2,HMX2,DNAI1,ARID3B,PHTF1,BACH2,BNC2,CPXM1,GYPE,EGFR,LMOD2,NF2,LAMA1,LRPPRC,CSMD1,SVEP1,PITPNM3,NLK,HEATR1,ADAMTS1,ACVR1B,ANK3,AR,APPL1,MYLK,IGSF9,CHEK2,CCAT1,CSF2RA,RET,PCM1,KCTD15,ODR4,SETX,PROS1,RTTN,MPP6,TACC2,ZNF532,TG,ECE2,LTBP4,NKTR,TNFRSF8,PKHD1L1,AHNAK2,KCNT1,PDHA1,H…	79
Cancer, Organismal Injury and Abnormalities, Renal and Urological Disease	urinary tract cancer	Urinary tract cancer	2.95e-05	AKAP13,C12orf57,CHEK2,CSF2RA,RET,OBSCN,PIK3R5,MYBPC1,CEP350,SETX,TBXA2R,STRN3,RTTN,TSHZ3,TACC2,ZNF532,ECE2,NKTR,EGFR,NF2,CSMD1,LRPPRC,NOP2,PKHD1L1,TIAM1,ACSS3,AHNAK2,KCNT1,SPARC,ACVR1B,AR,UBE4A,MAN2B2,UBN1,SDK1,MRPL51,HSD17B4,PTPRE,DECR1,TTN,EWSR1,ZNF608,KLHL18,THRB	44
Cardiovascular System Development and Function, Cellular Assembly and Organization, Cellular Development, Cellular Growth and Proliferation, Embryonic Development, Organ Development, Organismal Development, Skeletal and Muscular System Development and Function, Tissue Development	formation	Formation of myofibrils	3.09e-05	AR,AKAP13,LMOD2,MYLK,OBSCN,TTN	6
Cancer, Endocrine System Disorders, Organismal Injury and Abnormalities	epithelial thyroid cancer	Thyroid carcinoma	3.17e-05	AKAP13,OSGIN2,YTHDC1,OBSCN,PIK3R5,FAAP100,NCAM2,SP8,TRIM3,CEP350,STK32A,ARNT2,LMBRD2,TBXA2R,STRN3,TSHZ3,PLEKHA8,ZNF45,RPS11,HMX2,ARID3B,AZIN1,PHTF1,BNC2,SPOCK1,CPXM1,SCN10A,NF2,LAMA1,CSMD1,TIAM1,ADAMTS1,GNB2,AR,APPL1,UBE4A,NRP1,MYLK,DECR1,GALNT10,SPRR3,EWSR1,TSPYL2,KCTD15,ODR4,RTTN,PER3,RPS3A,TG,NKTR,TNFRSF8,ACSS3,AHNAK2,HCN4,CTSH,KLF7,MAN2B2,SDK1,HSD17B4,PTPRE,MAP2K2,TFCP2,STAP1,PTMA,ZNF608,ZBTB…	130
Skeletal and Muscular System Development and Function	contraction	Contraction of striated muscle	3.33e-05	C12orf57,SCN10A,HAX1,LMOD2,MYLK,TTN,HCN4,ANK3	8
Cancer, Dermatological Diseases and Conditions, Organismal Injury and Abnormalities	skin tumor	Skin tumor	3.52e-05	HOXC8,AKAP13,OSGIN2,OBSCN,PIK3R5,FAAP100,NCAM2,TRIM3,STK32A,ARNT2,LMBRD2,TSHZ3,PLEKHA8,RPS11,DNAI1,AZIN1,PHTF1,BNC2,CPXM1,SCN10A,NF2,LAMA1,CSMD1,TIAM1,AR,APPL1,UBE4A,NRP1,MYLK,DECR1,GALNT10,SPRR3,EWSR1,TRIM55,TSPYL2,CSF2RA,SLC35A4,ODR4,RTTN,PER3,TG,NKTR,FIGNL1,ANXA3,TNFRSF8,ACSS3,AHNAK2,HCN4,SDK1,PTPRE,MAP2K2,TFCP2,STAP1,SLC25A12,ZNF608,NETO1,SATB2,ESPL1,LSR,DNAH1,MYBPC1,SPA17,SHROOM3,AFF2,GSR,IM…	105
Cancer, Gastrointestinal Disease, Organismal Injury and Abnormalities	gastric cancer	Gastric cancer	3.56e-05	TRIM55,OSGIN2,CCAT1,CSF2RA,RET,OBSCN,RTTN,PER3,AFF2,TG,ZNF532,ECE2,LTBP4,NKTR,SPOCK1,BNC2,SGTB,EGFR,SCN10A,LAMA1,CSMD1,CLDN18,PKHD1L1,TIAM1,AHNAK2,NLK,HEATR1,ACVR1B,ANK3,AR,SDK1,MAP2K2,TTN,EWSR1,P4HB	35
Cancer, Organismal Injury and Abnormalities	neck neoplasm	Neck neoplasm	4.01e-05	AKAP13,OSGIN2,YTHDC1,OBSCN,PIK3R5,FAAP100,NCAM2,SP8,TRIM3,CEP350,STK32A,ARNT2,LMBRD2,TBXA2R,STRN3,TSHZ3,PLEKHA8,ZNF45,RPS11,HMX2,ARID3B,AZIN1,PHTF1,BNC2,SPOCK1,CPXM1,SCN10A,NF2,LAMA1,CSMD1,TIAM1,ADAMTS1,GNB2,AR,APPL1,UBE4A,NRP1,MYLK,DECR1,GALNT10,SPRR3,EWSR1,TSPYL2,CCAT1,KCTD15,ODR4,RTTN,PER3,RPS3A,TG,NKTR,TNFRSF8,ACSS3,AHNAK2,HCN4,CTSH,KLF7,MAN2B2,SDK1,HSD17B4,PTPRE,MAP2K2,TFCP2,STAP1,PTMA,ZNF60…	131
Cancer, Organismal Injury and Abnormalities	lymphoreticular neoplasm	Lymphoreticular neoplasm	4.05e-05	AKAP13,SATB2,ESPL1,DNAH1,OBSCN,PIK3R5,CEP350,ARNT2,SHROOM3,STRN3,TSHZ3,GSR,RPS11,LANCL2,DNAI1,AZIN1,POT1,BACH2,BNC2,EGFR,KCNRG,NF2,LAMA1,CSMD1,CRKL,SVEP1,HEATR1,CLEC18B,ANK3,NRP1,SPRR3,EWSR1,TRIM55,CHEK2,CSF2RA,RET,SETX,RTTN,PER3,TACC2,RPS3A,TG,ECE2,LTBP4,NKTR,ETNK1,TNFRSF8,AHNAK2,PDHA1,SPARC,CTSH,PTPRE,TFCP2,TTN,SHISA9	55
Cardiovascular System Development and Function, Organ Development, Organ Morphology, Skeletal and Muscular System Development and Function	contraction	Contraction of cardiac muscle	4.44e-05	SCN10A,HAX1,LMOD2,MYLK,TTN,HCN4,ANK3	7
Cancer, Organismal Injury and Abnormalities, Reproductive System Disease	male genital neoplasm	Male genital neoplasm	4.54e-05	AKAP13,SATB2,ESPL1,DNAH1,OBSCN,PIK3R5,FAAP100,MYBPC1,SP8,TRIM3,STK32A,SHROOM3,TBXA2R,STRN3,TSHZ3,PLEKHA8,GSR,AFF2,IMPG2,RNF216,BNC2,EGFR,SCN10A,LAMA1,CSMD1,LRPPRC,SVEP1,TIAM1,PPP1R9A,HEATR1,FRYL,ACVR1B,ANK3,AR,APPL1,NRP1,MYLK,GALNT10,EWSR1,TRIM55,C20orf194,TSPYL2,CHEK2,CSF2RA,SLC35A4,RET,SETX,PROS1,TACC2,PNPLA8,ZNF532,TG,LINC00599,LTBP4,B4GALT4,ANXA3,TNFRSF8,PKHD1L1,HCN4,SPARC,ZKSCAN1,SDK1,DPYSL3…	68
Cancer, Dermatological Diseases and Conditions, Organismal Injury and Abnormalities	skin cancer	Skin cancer	4.93e-05	HOXC8,AKAP13,OSGIN2,OBSCN,PIK3R5,FAAP100,NCAM2,TRIM3,STK32A,ARNT2,LMBRD2,TSHZ3,PLEKHA8,RPS11,DNAI1,AZIN1,PHTF1,BNC2,CPXM1,SCN10A,NF2,LAMA1,CSMD1,TIAM1,AR,APPL1,UBE4A,NRP1,MYLK,DECR1,GALNT10,SPRR3,EWSR1,TRIM55,TSPYL2,CSF2RA,SLC35A4,ODR4,RTTN,PER3,TG,NKTR,FIGNL1,ANXA3,TNFRSF8,ACSS3,AHNAK2,HCN4,SDK1,PTPRE,MAP2K2,TFCP2,STAP1,SLC25A12,ZNF608,NETO1,SATB2,ESPL1,LSR,DNAH1,MYBPC1,SPA17,SHROOM3,AFF2,GSR,IM…	104
Cardiovascular System Development and Function, Cellular Assembly and Organization, Cellular Development, Cellular Function and Maintenance, Cellular Growth and Proliferation, Embryonic Development, Organ Development, Organismal Development, Skeletal and Muscular System Development and Function, Tissue Development	organization	Organization of sarcomere	4.93e-05	AR,LMOD2,MYLK,OBSCN,TTN	5
Cell Morphology, Cellular Assembly and Organization, Cellular Function and Maintenance	formation	Formation of cellular protrusions	5.09e-05	MECP2,RET,PCM1,NCAM2,TRIM3,CEP41,AVIL,EGFR,PLEKHO1,NF2,LAMA1,CRKL,TIAM1,PPP1R9A,DVL1,SPARC,ANK3,AR,KLF7,RYK,NRP1,SDK1,DPYSL3,PTPRE,MAP2K2,IGSF9	26
Cell-To-Cell Signaling and Interaction, Cellular Assembly and Organization, Cellular Function and Maintenance	organization	Organization of intercellular junctions	5.22e-05	NF2,MECP2,SDK1,IGSF9,DVL1,SPARC,ANK3	7
Cancer, Organismal Injury and Abnormalities, Renal and Urological Disease	renal clear cell cancer	Renal clear cell adenocarcinoma	5.23e-05	EGFR,CHEK2,NF2,CSMD1,NOP2,RET,PIK3R5,PKHD1L1,MYBPC1,SPARC,ACVR1B,AR,STRN3,RTTN,TSHZ3,UBE4A,HSD17B4,MRPL51,PTPRE,TTN,ZNF532,KLHL18,THRB	23
Cancer, Gastrointestinal Disease, Organismal Injury and Abnormalities	colorectal adenocarcinoma	Colorectal adenocarcinoma	5.47e-05	AKAP13,OSGIN2,NETO1,ESPL1,LSR,DNAH1,OBSCN,PIK3R5,NCAM2,SP8,CEP350,TRIM3,SPRED1,STK32A,KATNAL2,SHROOM3,TSHZ3,AFF2,IMPG2,HMX2,DNAI1,ARID3B,PHTF1,BACH2,BNC2,CPXM1,GYPE,EGFR,LMOD2,NF2,LAMA1,CSMD1,LRPPRC,SVEP1,PITPNM3,PPP1R9A,NLK,HEATR1,ADAMTS1,ACVR1B,ANK3,AR,APPL1,IGSF9,CHEK2,CCAT1,CSF2RA,RET,PCM1,KCTD15,ODR4,SETX,PROS1,RTTN,MPP6,TACC2,ZNF532,TG,ECE2,LTBP4,NKTR,TNFRSF8,PKHD1L1,AHNAK2,KCNT1,PDHA1,HCN4…	76
Cancer, Organismal Injury and Abnormalities, Reproductive System Disease	neoplasia	Prostatic tumor	5.52e-05	AKAP13,SATB2,ESPL1,DNAH1,OBSCN,PIK3R5,FAAP100,MYBPC1,SP8,TRIM3,STK32A,SHROOM3,TBXA2R,STRN3,TSHZ3,PLEKHA8,GSR,AFF2,IMPG2,RNF216,BNC2,EGFR,SCN10A,LAMA1,CSMD1,LRPPRC,SVEP1,TIAM1,PPP1R9A,HEATR1,FRYL,ACVR1B,ANK3,AR,APPL1,NRP1,MYLK,GALNT10,EWSR1,TRIM55,C20orf194,TSPYL2,CHEK2,CSF2RA,SLC35A4,RET,SETX,PROS1,TACC2,PNPLA8,ZNF532,TG,LTBP4,B4GALT4,ANXA3,TNFRSF8,PKHD1L1,HCN4,SPARC,ZKSCAN1,SDK1,DPYSL3,PTPRE,STA…	67
Cancer, Endocrine System Disorders, Gastrointestinal Disease, Organismal Injury and Abnormalities	pancreatic tumor	Pancreatic tumor	5.52e-05	AKAP13,SATB2,ESPL1,DNAH1,OBSCN,PIK3R5,MYBPC1,TRIM3,LMBRD2,AFF2,PHTF1,POT1,CTSS,BNC2,EGFR,KCNRG,SCN10A,LMOD2,NF2,LAMA1,CSMD1,LRPPRC,TIAM1,PPP1R9A,FRYL,ADAMTS1,ACVR1B,AR,APPL1,NRP1,ERV3-1,CSF2RA,RET,KCTD15,PCM1,ODR4,SETX,RTTN,MPP6,TACC2,PNPLA8,RPS3A,TG,LTBP4,FIGNL1,NOP2,ACSS3,AHNAK2,KCNT1,KLF7,MAN2B2,MAP2K2,TTN	53
Cancer, Organismal Injury and Abnormalities, Reproductive System Disease	prostatic carcinoma	Prostatic carcinoma	5.69e-05	AKAP13,SATB2,ESPL1,DNAH1,OBSCN,PIK3R5,FAAP100,MYBPC1,SP8,TRIM3,STK32A,SHROOM3,TBXA2R,STRN3,TSHZ3,GSR,AFF2,IMPG2,RNF216,BNC2,EGFR,SCN10A,LAMA1,CSMD1,LRPPRC,SVEP1,TIAM1,PPP1R9A,HEATR1,FRYL,ACVR1B,ANK3,AR,APPL1,NRP1,MYLK,GALNT10,EWSR1,TRIM55,C20orf194,TSPYL2,CHEK2,CSF2RA,RET,SETX,PROS1,TACC2,PNPLA8,ZNF532,TG,LTBP4,B4GALT4,ANXA3,PKHD1L1,HCN4,SDK1,PTPRE,TTN,ZNF608,SHISA9	60
Cell Death and Survival	apoptosis	Apoptosis of tumor cell lines	5.89e-05	HAX1,CHEK2,CCAT1,CSF2RA,SATB2,RET,GPER1,DESI2,TBXA2R,GRIA2,LANCL2,ARID3B,POT1,SPOCK1,BACH2,EGFR,KCNRG,TUG1,TNFRSF8,TIAM1,DVL1,PDHA1,SPARC,ACVR1B,AR,NRP1,PTPRE,TFCP2,GALNT10,EWSR1,PTMA,P4HB	32
Gene Expression	transcription	Transcription	6.34e-05	HOXC8,AKAP13,HAX1,CHEK2,CIR1,MECP2,CSF2RA,SATB2,RET,ZNF703,SETX,GPER1,ARNT2,STRN3,TSHZ3,PER3,ZNF45,AFF2,LANCL2,TG,RNF216,PTGIR,ARID3B,BACH2,EGFR,mir-33,LRPPRC,NOP2,CRKL,NLK,HEATR1,DVL1,ACVR1B,ANK3,AR,CTSH,KLF7,UBN1,MAP2K2,TFCP2,STAP1,TTN,EWSR1,PTMA,ZNF608,THRB	46
Cardiovascular System Development and Function	internal diameter at end systole	Internal diameter at end systole of left ventricle	6.38e-05	MYLK,PNPLA8	2
Organ Morphology, Reproductive System Development and Function	quantity	Quantity of mammary alveolus	6.38e-05	AR,EGFR	2
Cancer, Endocrine System Disorders, Organismal Injury and Abnormalities	nonmedullary thyroid cancer	Thyroid gland nonmedullary carcinoma	6.39e-05	GPER1,EGFR,STRN3,PTPRE,RET,PCM1,TG,ADAMTS1,THRB	9
Cellular Assembly and Organization, Cellular Compromise	retraction	Retraction of cellular protrusions	6.71e-05	RYK,MECP2,NRP1,GRIA2,TIAM1,DVL1	6
Cancer, Organismal Injury and Abnormalities, Reproductive System Disease	malignant neoplasm of male genital organ	Malignant neoplasm of male genital organ	6.73e-05	AKAP13,SATB2,ESPL1,DNAH1,OBSCN,PIK3R5,FAAP100,MYBPC1,SP8,TRIM3,STK32A,SHROOM3,TBXA2R,STRN3,TSHZ3,PLEKHA8,GSR,AFF2,IMPG2,RNF216,BNC2,EGFR,SCN10A,LAMA1,CSMD1,LRPPRC,SVEP1,TIAM1,PPP1R9A,HEATR1,FRYL,ACVR1B,ANK3,AR,APPL1,NRP1,MYLK,GALNT10,EWSR1,C20orf194,TRIM55,TSPYL2,CHEK2,CSF2RA,SLC35A4,RET,SETX,PROS1,TACC2,PNPLA8,ZNF532,TG,LINC00599,LTBP4,B4GALT4,ANXA3,TNFRSF8,PKHD1L1,HCN4,SPARC,ZKSCAN1,SDK1,PTPRE,…	67
Cancer, Hematological Disease, Immunological Disease, Organismal Injury and Abnormalities	monoclonal gammopathy of undertermined significance	Monoclonal gammopathy of undertermined significance	7.17e-05	CEP41,STRN3,CHEK2,RET,PTPRE	5
Cancer, Hematological Disease, Immunological Disease, Organismal Injury and Abnormalities	diffuse small-cell lymphoma	Diffuse small-cell lymphoma	7.73e-05	POT1,TRIM55,BNC2,EGFR,CHEK2,SVEP1,SATB2,RET,CEP350,SHROOM3,RTTN,GSR,TFCP2,TTN,EWSR1,ECE2,SHISA9	17
Cancer, Endocrine System Disorders, Organismal Injury and Abnormalities	differentiated thyroid cancer	Differentiated thyroid cancer	7.88e-05	GPER1,EGFR,STRN3,PTPRE,MAP2K2,RET,TG,ADAMTS1,THRB	9
Cancer, Organismal Injury and Abnormalities	metastasis	Metastasis of head and neck tumor	7.95e-05	NRP1,RET,THRB	3
Energy Production, Lipid Metabolism, Small Molecule Biochemistry	beta-oxidation	Beta-oxidation of fatty acid	8.13e-05	mir-33,LRPPRC,HSD17B4,PNPLA2,DECR1,THRB	6
Cardiovascular System Development and Function, Organ Development, Organ Morphology	contraction	Contraction of heart	8.73e-05	SCN10A,HAX1,LMOD2,PNPLA2,MYLK,TTN,HCN4,THRB,ANK3	9
Cancer, Organismal Injury and Abnormalities, Reproductive System Disease	prostate cancer	Prostate cancer	8.85e-05	AKAP13,SATB2,ESPL1,DNAH1,OBSCN,PIK3R5,FAAP100,MYBPC1,SP8,TRIM3,STK32A,SHROOM3,TBXA2R,STRN3,TSHZ3,PLEKHA8,GSR,AFF2,IMPG2,RNF216,BNC2,EGFR,SCN10A,LAMA1,CSMD1,LRPPRC,SVEP1,TIAM1,PPP1R9A,HEATR1,FRYL,ACVR1B,ANK3,AR,APPL1,NRP1,MYLK,GALNT10,EWSR1,TRIM55,C20orf194,TSPYL2,CHEK2,CSF2RA,SLC35A4,RET,SETX,PROS1,TACC2,PNPLA8,ZNF532,TG,LTBP4,B4GALT4,ANXA3,TNFRSF8,PKHD1L1,HCN4,SPARC,ZKSCAN1,SDK1,PTPRE,STAP1,TTN,…	66
Cellular Movement	migration	Migration of carcinoma cell lines	9.11e-05	AR,CTSH,EGFR,HAX1,mir-33,HAND2-AS1,CCAT1,NRP1,SATB2,TIAM1	10
Organismal Functions	lethargy	Lethargy	9.31e-05	MECP2,PNPLA2,GRIA2,HSD17B4,DECR1	5
Developmental Disorder, Skeletal and Muscular Disorders	hypoplasia	Hypoplasia of vascular smooth muscle cells	0.000105	CTSS,PROS1,SPRR3	3
Cancer, Organismal Injury and Abnormalities, Reproductive System Disease	prostatic adenocarcinoma	Prostatic adenocarcinoma	0.000114	AKAP13,SATB2,ESPL1,DNAH1,OBSCN,PIK3R5,FAAP100,MYBPC1,TRIM3,STK32A,SHROOM3,TBXA2R,STRN3,TSHZ3,GSR,AFF2,IMPG2,RNF216,BNC2,EGFR,SCN10A,LAMA1,CSMD1,LRPPRC,SVEP1,TIAM1,PPP1R9A,HEATR1,FRYL,ACVR1B,ANK3,AR,APPL1,NRP1,MYLK,GALNT10,EWSR1,TRIM55,C20orf194,CHEK2,CSF2RA,RET,SETX,PROS1,TACC2,PNPLA8,ZNF532,TG,LTBP4,B4GALT4,PKHD1L1,HCN4,SDK1,PTPRE,TTN,ZNF608,SHISA9	57
Cancer, Organismal Injury and Abnormalities	growth	Growth of head and neck tumor	0.00012	EGFR,NRP1,RET,THRB	4
Cancer, Hematological Disease, Organismal Injury and Abnormalities	mature lymphocytic neoplasm	Mature lymphocytic neoplasm	0.000131	TRIM55,CHEK2,NETO1,CSF2RA,SATB2,RET,PIK3R5,CEP350,TRIM3,GPER1,SHROOM3,CEP41,STRN3,RTTN,GSR,ECE2,POT1,BNC2,BACH2,EGFR,KCNRG,CSMD1,SVEP1,TNFRSF8,SPARC,FRYL,CTSH,NRP1,MRPL51,PTPRE,TFCP2,TTN,EWSR1,SHISA9	34
Protein Synthesis	quantity	Quantity of protein lipid complex in blood	0.000131	CTSS,mir-33,MOGAT2,MECP2,PNPLA2,KCNE3	6
Cancer, Dermatological Diseases and Conditions, Organismal Injury and Abnormalities	non-melanoma skin cancer	Non-melanoma skin cancer	0.000141	BACH2,HOXC8,EGFR,LAMA1,CSMD1,SATB2,RET,OBSCN,PKHD1L1,ACSS3,PPP1R9A,NCAM2,NLK,MYBPC1,ANK3,SPA17,PROS1,RTTN,SDK1,MYLK,TTN,PTGIR	22
Cellular Assembly and Organization, Cellular Function and Maintenance	organization	Microtubule dynamics	0.000141	MECP2,RET,PCM1,NCAM2,CEP350,TRIM3,CEP41,TACC2,AVIL,CTSS,EGFR,PLEKHO1,NF2,LAMA1,CRKL,TIAM1,PPP1R9A,DVL1,SPARC,ANK3,AR,KLF7,RYK,NRP1,SDK1,DPYSL3,PTPRE,MAP2K2,MYLK,IGSF9	30
Cancer, Organismal Injury and Abnormalities, Tumor Morphology	progression	Progression of tumor	0.00016	AR,EGFR,NF2,CSF2RA,ANXA3,NRP1,GSR,MAP2K2,CLDN18,RET,ADAMTS1,SPARC	12
Cardiovascular Disease, Organismal Injury and Abnormalities, Respiratory Disease	pulmonary hypertensive arterial disease	Pulmonary hypertensive arterial disease	0.000162	AR,SCN10A,CSF2RA,RET,PTGIR	5
Cancer, Dermatological Diseases and Conditions, Organismal Injury and Abnormalities	cutaneous melanoma	Cutaneous melanoma	0.000165	AKAP13,OSGIN2,OBSCN,PIK3R5,FAAP100,NCAM2,TRIM3,STK32A,ARNT2,LMBRD2,TSHZ3,PLEKHA8,RPS11,DNAI1,AZIN1,PHTF1,BNC2,CPXM1,SCN10A,NF2,LAMA1,CSMD1,TIAM1,AR,APPL1,UBE4A,NRP1,MYLK,DECR1,GALNT10,SPRR3,EWSR1,TRIM55,TSPYL2,CSF2RA,SLC35A4,ODR4,PER3,TG,NKTR,FIGNL1,ANXA3,TNFRSF8,ACSS3,AHNAK2,HCN4,SDK1,PTPRE,MAP2K2,TFCP2,STAP1,SLC25A12,ZNF608,NETO1,SATB2,ESPL1,LSR,DNAH1,MYBPC1,SHROOM3,AFF2,IMPG2,FAM129A,RNF216,EP…	98
Cancer, Endocrine System Disorders, Gastrointestinal Disease, Organismal Injury and Abnormalities	pancreatic ductal adenocarcinoma	Pancreatic ductal adenocarcinoma	0.000166	AKAP13,ERV3-1,SATB2,ESPL1,DNAH1,PIK3R5,OBSCN,PCM1,MYBPC1,TRIM3,ODR4,SETX,LMBRD2,RTTN,AFF2,MPP6,TACC2,PNPLA8,RPS3A,TG,PHTF1,LTBP4,POT1,FIGNL1,SCN10A,KCNRG,LAMA1,LRPPRC,NOP2,CSMD1,TIAM1,PPP1R9A,ACSS3,KCNT1,AHNAK2,FRYL,ACVR1B,AR,APPL1,KLF7,MAN2B2,TTN	42
Cancer, Hematological Disease, Immunological Disease, Organismal Injury and Abnormalities	mature B-cell neoplasm	Mature B-cell neoplasm	0.000169	TRIM55,CHEK2,NETO1,CSF2RA,SATB2,RET,CEP350,TRIM3,SHROOM3,CEP41,STRN3,RTTN,GSR,ECE2,POT1,BACH2,BNC2,EGFR,KCNRG,CSMD1,SVEP1,TNFRSF8,FRYL,NRP1,MRPL51,PTPRE,TFCP2,TTN,EWSR1,SHISA9	30
Cellular Movement	scattering	Scattering of neuroblastoma cell lines	0.00019	EGFR,RET	2
Cell Signaling	MAPKKK cascade	MAPKKK cascade	0.000191	AR,SETX,GPER1,EGFR,NF2,DNAJC27,RYK,CSF2RA,MAP2K2,RET,SPRED1	11
Cancer, Hematological Disease, Immunological Disease, Organismal Injury and Abnormalities	lymphocytic leukemia	Lymphocytic leukemia	0.000194	POT1,BACH2,EGFR,SCN10A,NETO1,SVEP1,RET,TNFRSF8,TRIM3,SPRED1,FRYL,ANK3,GPER1,CEP41,LMBRD2,STRN3,NRP1,MRPL51,PTPRE,TTN	20
Cellular Assembly and Organization, Cellular Compromise, Nervous System Development and Function	retraction	Retraction of neurites	0.000216	RYK,MECP2,NRP1,TIAM1,DVL1	5
Cancer, Endocrine System Disorders, Organismal Injury and Abnormalities	papillary thyroid cancer	Papillary thyroid carcinoma	0.000216	GPER1,EGFR,STRN3,PTPRE,RET,TG,ADAMTS1,THRB	8
Cardiovascular Disease, Organismal Injury and Abnormalities	arrhythmia	Arrhythmia of heart ventricle	0.000225	SCN10A,MECP2,KCNE3,TTN,HCN4,THRB	6
Cancer, Organismal Injury and Abnormalities, Respiratory Disease	respiratory system tumor	Respiratory system tumor	0.000232	HAX1,SATB2,ESPL1,LSR,CEP350,TRIM3,GPER1,DESI2,CEP41,TSHZ3,RPS11,LANCL2,RNF216,AZIN1,BACH2,EGFR,SCN10A,NF2,CSMD1,LRPPRC,CRKL,SVEP1,HEATR1,ADAMTS1,ACVR1B,ANK3,AR,NRP1,IGSF9,THRB,P4HB,CHEK2,CCAT1,RET,KCTD15,PCM1,SPOPL,TG,ANXA3,TUG1,PKHD1L1,AHNAK2,PDHA1,SPARC,MAN2B2,ZKSCAN1,UBN1,HSD17B4,DPYSL3,PTPRE,MAP2K2,TTN	52
Cancer, Hematological Disease, Immunological Disease, Organismal Injury and Abnormalities	B-cell neoplasm	B-cell neoplasm	0.000241	TRIM55,CHEK2,NETO1,CSF2RA,SATB2,ESPL1,RET,CEP350,TRIM3,SHROOM3,CEP41,STRN3,RTTN,GSR,ECE2,POT1,BACH2,BNC2,EGFR,KCNRG,CSMD1,SVEP1,TNFRSF8,FRYL,NRP1,MRPL51,PTPRE,TFCP2,TTN,EWSR1,SHISA9	31
Cancer, Organismal Injury and Abnormalities	development	Development of melanoma	0.000248	BACH2,CSMD1,RET,CEP350,ANK3	5
Cancer, Organismal Injury and Abnormalities, Renal and Urological Disease	neoplasia	Bladder tumor	0.000253	AKAP13,C12orf57,CHEK2,CSF2RA,RET,OBSCN,CEP350,SETX,TBXA2R,TSHZ3,TACC2,ECE2,NKTR,EGFR,SCN10A,NF2,LRPPRC,PKHD1L1,TIAM1,ACSS3,KCNT1,AHNAK2,AR,MAN2B2,UBN1,SDK1,DECR1,TTN,ZNF608	29
Lipid Metabolism, Molecular Transport, Small Molecule Biochemistry	quantity	Quantity of thromboxane	0.000262	TBXA2R,PNPLA8,PTGIR	3
Cardiovascular System Development and Function, Cell Morphology, Organ Development, Organ Morphology, Skeletal and Muscular System Development and Function	contraction	Contraction of cardiomyocytes	0.000263	HAX1,LMOD2,MYLK,ANK3	4
Skeletal and Muscular System Development and Function	contraction	Muscle contraction	0.000276	C12orf57,SCN10A,HAX1,LMOD2,TBXA2R,MYLK,MYBPC1,TTN,HCN4,ANK3	10
Gene Expression	expression	Expression of RNA	0.000277	HOXC8,HAX1,CHEK2,CIR1,MECP2,CSF2RA,SATB2,RET,ZNF703,SETX,GPER1,ARNT2,STRN3,TSHZ3,PER3,ZNF45,AFF2,LANCL2,RPS3A,TG,PTGIR,ARID3B,BACH2,EGFR,mir-33,LRPPRC,NOP2,CRKL,NLK,HEATR1,DVL1,ACVR1B,ANK3,AR,CTSH,KLF7,UBN1,MRPL51,MAP2K2,TFCP2,STAP1,TTN,EWSR1,PTMA,ZNF608,THRB	46
Cancer, Hematological Disease, Immunological Disease, Organismal Injury and Abnormalities	acute leukemia	Acute leukemia	0.00028	AKAP13,CHEK2,CSF2RA,RET,DNAH1,OBSCN,SPRED1,SETX,ARNT2,LMBRD2,TSHZ3,PER3,RPS11,TACC2,RPS3A,DNAI1,TG,AZIN1,LTBP4,POT1,NKTR,BACH2,BNC2,EGFR,SCN10A,LAMA1,CSMD1,SVEP1,AHNAK2,HEATR1,CLEC18B,PDHA1,ANK3,NRP1,PTPRE,SPRR3,TTN	37
Cancer, Dermatological Diseases and Conditions, Organismal Injury and Abnormalities	squamous cell skin cancer	Skin squamous cell carcinoma	0.000301	BACH2,HOXC8,EGFR,LAMA1,CSMD1,SATB2,OBSCN,PKHD1L1,ACSS3,PPP1R9A,NCAM2,NLK,MYBPC1,ANK3,SPA17,PROS1,RTTN,SDK1,MYLK,TTN,PTGIR	21
Developmental Disorder, Organismal Injury and Abnormalities, Renal and Urological Disease, Reproductive System Disease	hypospadia	Hypospadia	0.000316	AR,SCN10A,SP8	3
Cancer, Organismal Injury and Abnormalities	spindle cell neoplasm	Spindle cell neoplasm	0.000317	EGFR,NF2,MAP2K2,RET,SPRR3,TTN	6
Cancer, Organismal Injury and Abnormalities, Renal and Urological Disease	cancer	Bladder cancer	0.000318	AKAP13,C12orf57,CHEK2,CSF2RA,RET,OBSCN,CEP350,SETX,TBXA2R,TSHZ3,TACC2,ECE2,NKTR,EGFR,NF2,LRPPRC,PKHD1L1,TIAM1,ACSS3,KCNT1,AHNAK2,AR,MAN2B2,UBN1,SDK1,DECR1,TTN,ZNF608	28
Cancer, Connective Tissue Disorders, Organismal Injury and Abnormalities	connective tissue cancer	Connective tissue cancer	0.000319	NKTR,AR,EGFR,NF2,CHEK2,NRP1,RET,TTN,EWSR1,SPARC	10
Cellular Movement	cell movement	Cell movement	0.000321	HAX1,CCAT1,MECP2,CSF2RA,SATB2,RET,DNAH1,OBSCN,PIK3R5,PCM1,TRIM3,ZNF703,GPER1,PROS1,TBXA2R,GRIA2,DNAI1,TG,PTGIR,CTSS,BACH2,EGFR,PLEKHO1,mir-33,NF2,LAMA1,CRKL,ANXA3,KCNE3,TNFRSF8,TIAM1,SPARC,ADAMTS1,GNB2,AR,APPL1,CTSH,HAND2-AS1,RYK,NRP1,DPYSL3,MAP2K2,MYLK,STAP1,PTMA,THRB,P4HB	47
Cancer, Hematological Disease, Immunological Disease, Organismal Injury and Abnormalities	diffuse B-cell lymphoma	Diffuse B-cell lymphoma	0.000327	POT1,TRIM55,BNC2,EGFR,KCNRG,CHEK2,SVEP1,SATB2,TNFRSF8,CEP350,SHROOM3,RTTN,GSR,TFCP2,TTN,EWSR1,ECE2,SHISA9	18
Cardiovascular Disease, Hereditary Disorder, Organismal Injury and Abnormalities	familial cardiovascular disease	Familial cardiovascular disease	0.000327	SCN10A,CRKL,KCNE3,DNAH1,DVL1,HCN4,PROS1,NRP1,MAP2K2,MYLK,STAP1,DNAI1,TTN,PTGIR,ECE2	15
Energy Production, Lipid Metabolism, Small Molecule Biochemistry	oxidation	Oxidation of long chain fatty acid	0.000342	mir-33,LRPPRC,HSD17B4,PNPLA2,PNPLA8	5
Cancer, Endocrine System Disorders, Organismal Injury and Abnormalities	follicular thyroid cancer	Follicular thyroid carcinoma	0.000364	EGFR,RET,TG,ADAMTS1,THRB	5
Energy Production, Lipid Metabolism, Small Molecule Biochemistry	oxidation	Oxidation of fatty acid	0.000375	APPL1,mir-33,LRPPRC,HSD17B4,PNPLA2,DECR1,PNPLA8,THRB	8
Cancer, Organismal Injury and Abnormalities, Reproductive System Disease	mammary tumor	Mammary tumor	0.000377	AKAP13,HAX1,CHEK2,CSF2RA,ESPL1,LSR,RET,DNAH1,OBSCN,PCM1,TRIM3,ZNF703,GPER1,CEP41,STRN3,RTTN,TSHZ3,ZNF45,AFF2,GSR,GRIA2,MPP6,LTBP4,NKTR,EGFR,SCN10A,NF2,LAMA1,ANXA3,PKHD1L1,KCNT1,HEATR1,FRYL,SPARC,ADAMTS1,ACVR1B,AR,MAN2B2,SDK1,PTPRE,MAP2K2,MYLK,DECR1,SLC25A12,TTN,THRB,P4HB	47
Neurological Disease, Ophthalmic Disease, Organismal Injury and Abnormalities	ataxia with oculomotor apraxia	Ataxia with oculomotor apraxia	0.000379	SETX,PIK3R5	2
Cancer, Neurological Disease, Organismal Injury and Abnormalities	hyperplasia	Hyperplasia of neuroglia	0.000379	NF2,RET	2
Endocrine System Disorders, Metabolic Disease, Organismal Injury and Abnormalities	primary myxedema	Primary myxedema	0.000379	TG,THRB	2
Cellular Assembly and Organization	sliding	Sliding of actin filaments	0.000379	MYBPC1,TTN	2
Cancer, Organismal Injury and Abnormalities, Reproductive System Disease	breast cancer	Breast cancer	0.00038	AKAP13,HAX1,CHEK2,CSF2RA,ESPL1,LSR,RET,DNAH1,OBSCN,PCM1,TRIM3,ZNF703,GPER1,CEP41,STRN3,RTTN,TSHZ3,ZNF45,GSR,AFF2,GRIA2,MPP6,LTBP4,NKTR,EGFR,SCN10A,NF2,LAMA1,ANXA3,PKHD1L1,KCNT1,HEATR1,FRYL,SPARC,ADAMTS1,ACVR1B,AR,MAN2B2,SDK1,PTPRE,MAP2K2,MYLK,SLC25A12,TTN,P4HB	45
Developmental Disorder	hypoplasia	Hypoplasia of cells	0.000385	CTSS,AR,PROS1,SPRR3	4
Cancer, Hematological Disease, Immunological Disease, Organismal Injury and Abnormalities	diffuse lymphoma	Diffuse lymphoma	0.000392	POT1,TRIM55,BNC2,EGFR,KCNRG,CHEK2,SVEP1,SATB2,RET,TNFRSF8,CEP350,SHROOM3,RTTN,GSR,TFCP2,TTN,EWSR1,ECE2,SHISA9	19
Connective Tissue Development and Function, Tissue Morphology	quantity	Quantity of adipocytes	0.000421	AR,MOGAT2,NLK,SPARC	4
Cancer, Hematological Disease, Immunological Disease, Organismal Injury and Abnormalities	myeloid leukemia	Myeloid leukemia	0.000424	AKAP13,CHEK2,CSF2RA,RET,DNAH1,OBSCN,SETX,ARNT2,TSHZ3,PER3,RPS11,TACC2,RPS3A,DNAI1,TG,AZIN1,LTBP4,POT1,NKTR,BACH2,BNC2,EGFR,LAMA1,CSMD1,SVEP1,ETNK1,AHNAK2,HEATR1,CLEC18B,PDHA1,ANK3,NRP1,PTPRE,SPRR3,TTN	35
Cancer, Endocrine System Disorders, Organismal Injury and Abnormalities	growth	Growth of endocrine gland tumor	0.000446	CTSS,RET,THRB	3
Cancer, Neurological Disease, Organismal Injury and Abnormalities	hyperplasia	Hyperplasia of nervous system	0.000446	NF2,RET,TG	3
Cardiovascular Disease, Organismal Injury and Abnormalities	supraventricular arrhythmia	Supraventricular arrhythmia	0.000468	AR,SCN10A,KCNE3,PTPRE,TTN,HCN4,THRB	7
Cancer, Organismal Injury and Abnormalities, Renal and Urological Disease	bladder carcinoma	Bladder carcinoma	0.000469	AKAP13,C12orf57,CHEK2,RET,OBSCN,CEP350,SETX,TSHZ3,TACC2,ECE2,NKTR,EGFR,NF2,LRPPRC,PKHD1L1,TIAM1,ACSS3,KCNT1,AHNAK2,AR,MAN2B2,UBN1,SDK1,DECR1,TTN,ZNF608	26
Cellular Assembly and Organization, Cellular Function and Maintenance	organization	Organization of cytoskeleton	0.000472	MECP2,ESPL1,RET,PCM1,NCAM2,CEP350,TRIM3,SHROOM3,CEP41,TACC2,AVIL,CTSS,EGFR,PLEKHO1,NF2,LAMA1,CRKL,TIAM1,PPP1R9A,DVL1,SPARC,ANK3,AR,KLF7,RYK,NRP1,SDK1,DPYSL3,PTPRE,MAP2K2,MYLK,IGSF9	32
Developmental Disorder	dysgenesis	Dysgenesis	0.000473	CTSS,BACH2,EGFR,AKAP13,HAX1,LAMA1,SATB2,LSR,RET,SP8,AR,PROS1,KLF7,HSD17B4,SPRR3,TTN,ECE2	17
Cellular Development, Cellular Growth and Proliferation, Nervous System Development and Function, Tissue Development	outgrowth	Outgrowth of neurites	0.000476	EGFR,NF2,LAMA1,RET,TIAM1,NCAM2,TRIM3,DVL1,AR,KLF7,NRP1,DPYSL3,EWSR1	13
Cellular Movement	migration	Migration of tumor cells	0.00048	EGFR,NF2,NRP1,CSF2RA,SATB2,RET,TIAM1,THRB,SPARC	9
Cancer, Organismal Injury and Abnormalities	breast or pancreatic cancer	Breast or pancreatic cancer	0.000503	HOXC8,AKAP13,HAX1,SATB2,ESPL1,LSR,DNAH1,OBSCN,PIK3R5,MYBPC1,SP8,TRIM3,GPER1,LMBRD2,CEP41,TBXA2R,STRN3,TSHZ3,ZNF45,AFF2,GSR,ARID3B,PHTF1,POT1,CTSS,EGFR,KCNRG,SCN10A,NF2,LAMA1,CSMD1,LRPPRC,CRKL,TIAM1,PPP1R9A,HEATR1,FRYL,ADAMTS1,ACVR1B,AR,APPL1,NRP1,MYLK,P4HB,CHEK2,ERV3-1,CSF2RA,RET,PCM1,KCTD15,ZNF703,ODR4,SETX,RTTN,GRIA2,MPP6,TACC2,PNPLA8,RPS3A,TG,LTBP4,NKTR,FIGNL1,NOP2,ANXA3,PKHD1L1,ACSS3,AHNAK2,K…	78
Cancer, Hematological Disease, Immunological Disease, Organismal Injury and Abnormalities	chronic lymphocytic leukemia / small lymphocytic lymphoma	Chronic lymphocytic leukemia / small lymphocytic lymphoma	0.000521	POT1,BACH2,TRIM55,BNC2,EGFR,CHEK2,SVEP1,SATB2,CEP350,SHROOM3,STRN3,NRP1,PTPRE,TFCP2,EWSR1,ECE2	16
Cellular Movement	cell movement	Cell movement of tumor cells	0.000535	EGFR,NF2,NRP1,CSF2RA,RET,TIAM1,THRB,SPARC	8
Cancer, Organismal Injury and Abnormalities, Tumor Morphology	solid tumor	Progressive solid tumor	0.000551	AR,EGFR,GSR,CSF2RA,ANXA3,CLDN18,RET,MAP2K2	8
Organismal Development	morphology	Morphology of head	0.000553	AKAP13,MECP2,SATB2,PCM1,NCAM2,SP8,SPRED1,ARNT2,PROS1,GRIA2,HMX2,ARID3B,ECE2,POT1,EGFR,CRKL,DVL1,SPARC,ACVR1B,ANK3,KLF7,RYK,DPYSL3,MAP2K2,THRB	25
Cancer, Hematological Disease, Immunological Disease, Organismal Injury and Abnormalities	acute myeloid leukemia	Acute myeloid leukemia	0.000576	AKAP13,CHEK2,CSF2RA,RET,DNAH1,OBSCN,SETX,ARNT2,TSHZ3,PER3,RPS11,TACC2,RPS3A,DNAI1,TG,AZIN1,LTBP4,POT1,NKTR,BACH2,BNC2,EGFR,LAMA1,CSMD1,SVEP1,AHNAK2,HEATR1,CLEC18B,PDHA1,ANK3,NRP1,PTPRE,SPRR3,TTN	34
Cancer, Organismal Injury and Abnormalities	sarcoma	Sarcoma	0.000594	CHEK2,CSF2RA,RET,SETX,TSHZ3,GSR,RPS3A,TG,LTBP4,NKTR,EGFR,SCN10A,NF2,LRPPRC,CRKL,TNFRSF8,PKHD1L1,TIAM1,CLEC18B,DAPL1,SPARC,AR,NRP1,HSD17B4,MAP2K2,MYLK,TTN,EWSR1	28
Cell Morphology, Cellular Assembly and Organization	elongation	Elongation of plasma membrane projections	0.000628	EGFR,NF2	2
Cancer, Organismal Injury and Abnormalities	micropapillary adenocarcinoma	Micropapillary adenocarcinoma	0.000628	EGFR,MAP2K2	2
Cellular Movement, Nervous System Development and Function	migration	Migration of sympathetic neuron	0.000628	NRP1,RET	2
Cancer, Gastrointestinal Disease, Organismal Injury and Abnormalities	colon carcinoma	Advanced stage colon carcinoma	0.000636	EGFR,CCAT1,RET,MAP2K2	4
Cancer, Organismal Injury and Abnormalities	malignant solid tumor	Relapsed malignant solid tumor	0.000656	AR,EGFR,GSR,CSF2RA,RET,MAP2K2,TNFRSF8	7
Cancer, Hematological Disease, Organismal Injury and Abnormalities	malignant myeloid neoplasm	Malignant myeloid neoplasm	0.000658	AKAP13,CHEK2,CSF2RA,RET,DNAH1,OBSCN,SETX,ARNT2,STRN3,TSHZ3,PER3,RPS11,TACC2,RPS3A,DNAI1,TG,AZIN1,LTBP4,POT1,NKTR,BACH2,BNC2,EGFR,LAMA1,CSMD1,SVEP1,ETNK1,AHNAK2,HEATR1,CLEC18B,PDHA1,ANK3,NRP1,PTPRE,SPRR3,TTN	36
Cellular Movement	cell movement	Cell movement of hepatoma cell lines	0.000691	AR,CTSH,EGFR,HAND2-AS1,THRB,SPARC	6
Cardiovascular Disease, Hereditary Disorder, Organismal Injury and Abnormalities	familial heart disease	Familial heart disease	0.000705	SCN10A,CRKL,NRP1,KCNE3,DNAH1,DNAI1,TTN,DVL1,HCN4,ECE2	10
Cell-To-Cell Signaling and Interaction, Cellular Assembly and Organization, Cellular Function and Maintenance, Tissue Development	organization	Organization of synapse	0.000714	MECP2,IGSF9,DVL1,SPARC,ANK3	5
Cancer, Gastrointestinal Disease, Organismal Injury and Abnormalities	metastatic colorectal adenocarcinoma	Metastatic colorectal adenocarcinoma	0.000741	EGFR,CCAT1,RET,MAP2K2	4
Cancer, Hematological Disease, Organismal Injury and Abnormalities	myeloid neoplasm	Myeloid neoplasm	0.000764	AKAP13,CHEK2,CSF2RA,RET,DNAH1,OBSCN,SETX,ARNT2,STRN3,TSHZ3,PER3,RPS11,TACC2,RPS3A,DNAI1,TG,AZIN1,LTBP4,POT1,NKTR,BACH2,BNC2,EGFR,LAMA1,CSMD1,SVEP1,TNFRSF8,ETNK1,AHNAK2,HEATR1,CLEC18B,PDHA1,ANK3,NRP1,PTPRE,SPRR3,TTN	37
Cancer, Connective Tissue Disorders, Organismal Injury and Abnormalities, Skeletal and Muscular Disorders	bone tumor	Bone tumor	0.000768	AR,NKTR,EGFR,NF2,CHEK2,NRP1,RET,TTN	8
Cell Morphology, Cellular Assembly and Organization, Cellular Development, Cellular Function and Maintenance, Cellular Growth and Proliferation, Nervous System Development and Function, Organismal Development, Tissue Development	axonogenesis	Axonogenesis	0.000781	NF2,KLF7,RYK,PTPRE,MAP2K2,RET,TIAM1,DVL1,ANK3	9
Cancer, Gastrointestinal Disease, Organismal Injury and Abnormalities, Tumor Morphology	gastrointestinal carcinoma	Progressive gastrointestinal carcinoma	0.000798	EGFR,RET,CLDN18,MAP2K2	4
Developmental Disorder	aplasia or hypoplasia	Aplasia or hypoplasia	0.000845	CTSS,BACH2,EGFR,AKAP13,HAX1,LAMA1,SATB2,LSR,RET,SP8,AR,PROS1,KLF7,SPRR3,TTN,ECE2	16
Nervous System Development and Function, Neurological Disease, Organ Morphology, Organismal Development, Organismal Injury and Abnormalities	abnormal morphology	Abnormal morphology of olfactory bulb	0.000858	EGFR,KLF7,MECP2,NCAM2	4
Cancer, Dermatological Diseases and Conditions, Organismal Injury and Abnormalities	skin carcinoma	Skin carcinoma	0.000868	HOXC8,NETO1,SATB2,ESPL1,OBSCN,NCAM2,MYBPC1,SPA17,PROS1,RTTN,GRIA2,TACC2,PTGIR,BACH2,EGFR,LAMA1,CSMD1,SVEP1,PKHD1L1,PPP1R9A,ACSS3,NLK,HEATR1,FRYL,ANK3,SDK1,MYLK,TTN	28
Cardiovascular Disease, Hematological Disease, Metabolic Disease, Organismal Injury and Abnormalities	hypercholesterolemia	Hypercholesterolemia	0.000873	AR,CTSS,MOGAT2,STAP1,THRB	5
Organismal Development, Skeletal and Muscular System Development and Function	morphology	Morphology of hindlimb	0.000873	AR,TRIM55,SATB2,SP8,TTN	5
Lipid Metabolism, Molecular Transport, Small Molecule Biochemistry	quantity	Quantity of steroid	0.000874	CTSS,EGFR,mir-33,MOGAT2,MECP2,KCNE3,LSR,AR,GPER1,PNPLA2,HSD17B4,TG,PTGIR,THRB	14
Cancer, Organismal Injury and Abnormalities	serous neoplasm	Serous neoplasm	0.000875	NKTR,EGFR,TSPYL2,CHEK2,NF2,CSMD1,CRKL,ANXA3,ESPL1,AHNAK2,HCN4,ACVR1B,AR,CEP41,TSHZ3,SDK1,GRIA2,MAP2K2,MYLK,SLC25A12,TTN,TG	22
Cancer, Organismal Injury and Abnormalities	metastatic solid tumor	Metastatic solid tumor	0.000875	EGFR,HAX1,mir-33,CHEK2,NF2,CCAT1,CSF2RA,ESPL1,CLDN18,RET,ADAMTS1,ANK3,AR,GSR,DPYSL3,MAP2K2,RPS11,THRB	18
Cardiovascular Disease, Organismal Injury and Abnormalities	arrhythmia	Arrhythmia	0.000897	AR,SCN10A,TBXA2R,MECP2,KCNE3,PTPRE,TTN,HCN4,THRB	9
Cancer, Hematological Disease, Organismal Injury and Abnormalities	bone marrow cancer	Bone marrow cancer	0.000903	AKAP13,CHEK2,CSF2RA,RET,DNAH1,OBSCN,SETX,ARNT2,STRN3,TSHZ3,PER3,RPS11,TACC2,RPS3A,DNAI1,TG,AZIN1,LTBP4,POT1,NKTR,BACH2,BNC2,EGFR,LAMA1,CSMD1,SVEP1,ETNK1,AHNAK2,HEATR1,CLEC18B,PDHA1,ANK3,NRP1,PTPRE,SPRR3,TTN	36
Cancer, Organismal Injury and Abnormalities	angiogenesis	Angiogenesis of malignant tumor	0.000904	CTSS,EGFR,ADAMTS1	3
Cancer, Endocrine System Disorders, Organismal Injury and Abnormalities	mixed papillary and follicular thyroid cancer	Follicular papillary thyroid carcinoma	0.000904	EGFR,RET,ADAMTS1	3
Cancer, Gastrointestinal Disease, Organismal Injury and Abnormalities, Tumor Morphology	secondary neoplasm of digestive system	Progressive secondary neoplasm of digestive system	0.000904	EGFR,RET,MAP2K2	3
Cancer, Organismal Injury and Abnormalities	mixed neoplasia	Mixed neoplasia	0.00093	HOXC8,CHEK2,CSF2RA,LSR,RET,PIK3R5,OBSCN,TBXA2R,TSHZ3,GSR,TG,ARID3B,LTBP4,EGFR,SCN10A,NF2,LRPPRC,CSMD1,SVEP1,TNFRSF8,PKHD1L1,TIAM1,HEATR1,CLEC18B,DAPL1,NRP1,HSD17B4,MAP2K2,MYLK,TTN	30
Endocrine System Development and Function, Molecular Transport, Small Molecule Biochemistry	abnormal quantity	Abnormal quantity of pituitary hormone derivative	0.000937	ARNT2,THRB	2
Cancer, Organismal Injury and Abnormalities	refractory solid tumor	Advanced refractory solid tumor	0.000937	EGFR,TNFRSF8	2
Cancer, Neurological Disease, Organismal Injury and Abnormalities	EGFR positive malignant glioma	EGFR positive malignant glioma	0.000937	EGFR,CSF2RA	2
Endocrine System Disorders, Inflammatory Disease, Inflammatory Response, Organismal Injury and Abnormalities, Reproductive System Disease	hypophysitis	Hypophysitis	0.000937	AR,THRB	2
Cancer, Endocrine System Disorders, Organismal Injury and Abnormalities	metastasis	Metastasis of thyroid gland tumor	0.000937	RET,THRB	2
Cell Morphology	sprouting	Sprouting	0.000959	MECP2,RET,TIAM1,PPP1R9A,NCAM2,TRIM3,ADAMTS1,KLF7,RYK,NRP1,SDK1,DPYSL3,IGSF9	13
Cell Death and Survival	cell death	Cell death of tumor cell lines	0.000976	HAX1,CHEK2,CCAT1,CSF2RA,SATB2,RET,GPER1,DESI2,TBXA2R,GRIA2,LANCL2,NUP58,ARID3B,POT1,SPOCK1,BACH2,EGFR,KCNRG,TUG1,TNFRSF8,TIAM1,DVL1,PDHA1,SPARC,ACVR1B,AR,NRP1,PTPRE,MAP2K2,TFCP2,GALNT10,EWSR1,PTMA,P4HB	34
Protein Synthesis	quantity	Quantity of ldl cholesterol in blood	0.000987	CTSS,MOGAT2,MECP2,KCNE3	4
Cardiovascular Disease, Hereditary Disorder, Organismal Injury and Abnormalities, Skeletal and Muscular Disorders	Brugada syndrome type 1	Brugada syndrome type 1	0.00102	SCN10A,KCNE3,HCN4	3
Cancer, Gastrointestinal Disease, Organismal Injury and Abnormalities	metastatic colon adenocarcinoma	Metastatic colon adenocarcinoma	0.00102	EGFR,CCAT1,MAP2K2	3
Cell-To-Cell Signaling and Interaction, Nervous System Development and Function	miniature inhibitory postsynaptic current	Miniature inhibitory postsynaptic current	0.00102	MECP2,IGSF9,TRIM3	3
Cell-To-Cell Signaling and Interaction	signaling	Signaling of tumor cell lines	0.00102	AR,EGFR,SPARC	3
Cancer, Endocrine System Disorders, Organismal Injury and Abnormalities	thyroid oncocytic carcinoma	Thyroid oncocytic carcinoma	0.00102	EGFR,RET,THRB	3
Cellular Development, Cellular Growth and Proliferation, Nervous System Development and Function, Tissue Development	growth	Growth of neurites	0.00104	EGFR,NF2,LAMA1,RET,TIAM1,NCAM2,DVL1,TRIM3,AR,KLF7,NRP1,DPYSL3,IGSF9,EWSR1	14
Cancer, Hematological Disease, Immunological Disease, Organismal Injury and Abnormalities	lymphoma	Lymphoma	0.00105	TRIM55,CHEK2,CSF2RA,SATB2,ESPL1,RET,PIK3R5,CEP350,SHROOM3,RTTN,GSR,LANCL2,ECE2,POT1,BNC2,EGFR,KCNRG,NF2,CRKL,SVEP1,TNFRSF8,CLEC18B,SPARC,CTSH,PTPRE,TFCP2,TTN,EWSR1,SHISA9	29
Endocrine System Disorders, Metabolic Disease, Organismal Injury and Abnormalities	hyperthyroidism	Hyperthyroidism	0.00106	BACH2,SCN10A,TG,THRB	4
Cancer, Organismal Injury and Abnormalities	head and neck cancer	Metastatic head and neck cancer	0.00106	AR,EGFR,GSR,MAP2K2,RET	5
Cancer, Organismal Injury and Abnormalities	advanced solid tumor	Stage IV advanced solid tumor	0.00109	AR,EGFR,CSF2RA,MAP2K2,RET,TNFRSF8	6
Cancer	transformation	Cell transformation	0.0011	AKAP13,EGFR,NF2,CSF2RA,RET,PIK3R5,TIAM1,TNFRSF8,DVL1,PTPRE,MAP2K2,RPS3A,EWSR1	13
Gene Expression	transcription	Transcription of RNA	0.0011	HOXC8,HAX1,CHEK2,CIR1,MECP2,CSF2RA,SATB2,RET,ZNF703,SETX,GPER1,ARNT2,STRN3,TSHZ3,PER3,ZNF45,LANCL2,TG,PTGIR,ARID3B,BACH2,EGFR,LRPPRC,NOP2,NLK,HEATR1,DVL1,ACVR1B,AR,KLF7,UBN1,MAP2K2,TFCP2,EWSR1,PTMA,ZNF608,THRB	37
Cancer, Organismal Injury and Abnormalities	papillary adenocarcinoma	Papillary adenocarcinoma	0.00111	GPER1,EGFR,STRN3,NF2,PTPRE,RET,MAP2K2,TTN,TG,ADAMTS1,THRB	11
Cellular Assembly and Organization, Tissue Development	fibrogenesis	Fibrogenesis	0.00113	EGFR,AKAP13,HAX1,LMOD2,CHEK2,NF2,OBSCN,TIAM1,PPP1R9A,SPARC,AR,MYLK,DPYSL3,TTN	14
Cardiovascular System Development and Function, Embryonic Development, Organ Development, Organismal Development, Tissue Development	cardiogenesis	Cardiogenesis	0.00116	EGFR,AKAP13,LMOD2,CRKL,OBSCN,AR,KLF7,PNPLA2,NRP1,MAP2K2,MYLK,DNAI1,TTN,ARID3B,ECE2	15
Cellular Assembly and Organization, Tissue Development	formation	Formation of filaments	0.00117	EGFR,AKAP13,HAX1,LMOD2,CHEK2,NF2,TIAM1,PPP1R9A,SPARC,AR,MYLK,DPYSL3,TTN	13
Cancer, Hematological Disease, Immunological Disease, Organismal Injury and Abnormalities	smoldering myeloma	Smoldering myeloma	0.00121	CEP41,STRN3,RET,PTPRE	4
Cardiovascular Disease, Organismal Injury and Abnormalities	right ventricular abnormality	Right ventricular abnormality	0.00121	CRKL,PNPLA2,TTN,DVL1,HCN4,ECE2	6
Cancer, Hematological Disease, Immunological Disease, Organismal Injury and Abnormalities	small lymphocytic lymphoma cancer	Small B-cell lymphocytic lymphoma	0.00121	POT1,BNC2,TRIM55,SHROOM3,EGFR,CHEK2,SVEP1,SATB2,TFCP2,EWSR1,CEP350,ECE2	12
Cancer, Organismal Injury and Abnormalities, Reproductive System Disease	breast adenocarcinoma	Breast adenocarcinoma	0.00124	EGFR,NF2,CHEK2,ESPL1,RET,OBSCN,ACVR1B,ZNF703,AR,TSHZ3,PTPRE,MAP2K2,LTBP4	13
Cell Morphology, Cellular Assembly and Organization, Cellular Development, Cellular Function and Maintenance, Cellular Growth and Proliferation, Embryonic Development, Nervous System Development and Function, Organismal Development, Tissue Development, Tissue Morphology	density	Density of dendritic spines	0.00127	MECP2,SDK1,TIAM1,PPP1R9A,TRIM3	5
Cellular Assembly and Organization, Cellular Function and Maintenance, Tissue Development	formation	Formation of actin stress fibers	0.00127	AR,AKAP13,EGFR,HAX1,NF2,MYLK,TIAM1,PPP1R9A,SPARC	9
Organismal Development, Renal and Urological System Development and Function	morphogenesis	Morphogenesis of urinary tract	0.00128	TSHZ3,RET,ADAMTS1	3
Cardiovascular Disease, Cardiovascular System Development and Function, Organ Morphology, Organismal Development, Organismal Injury and Abnormalities	abnormal morphology	Abnormal morphology of left atrium	0.0013	CRKL,TTN	2
Lipid Metabolism, Molecular Transport, Small Molecule Biochemistry	abnormal quantity	Abnormal quantity of thromboxane	0.0013	TBXA2R,PTGIR	2
Connective Tissue Development and Function, Skeletal and Muscular System Development and Function, Tissue Development	formation	Formation of secondary center of ossification	0.0013	EGFR,THRB	2
Cancer, Endocrine System Disorders, Organismal Injury and Abnormalities, Tumor Morphology	progressive medullary thyroid cancer	Locally advanced progressive medullary thyroid cancer	0.0013	EGFR,RET	2
Cancer, Gastrointestinal Disease, Organismal Injury and Abnormalities, Tumor Morphology	metastatic rectal adenocarcinoma	Progressive metastatic rectal adenocarcinoma	0.0013	EGFR,MAP2K2	2
Organ Morphology, Renal and Urological System Development and Function, Tissue Morphology	quantity	Quantity of podocytes	0.0013	PNPLA8,SPARC	2
Cancer, Hereditary Disorder, Organismal Injury and Abnormalities, Reproductive System Disease	susceptibility to prostate cancer	Susceptibility to prostate cancer	0.0013	AR,CHEK2	2
Cancer, Endocrine System Disorders, Organismal Injury and Abnormalities	RET mutation negative medullary thyroid cancer	Symptomatic stage aggressive RET mutation negative medullary thyroid cancer	0.0013	EGFR,RET	2
Cancer, Endocrine System Disorders, Hereditary Disorder, Organismal Injury and Abnormalities	RET mutation positive medullary thyroid cancer	Symptomatic stage aggressive RET mutation positive medullary thyroid cancer	0.0013	EGFR,RET	2
Cancer, Endocrine System Disorders, Organismal Injury and Abnormalities	RET mutation negative medullary thyroid cancer	Symptomatic stage locally advanced RET mutation negative medullary thyroid cancer	0.0013	EGFR,RET	2
Cancer, Endocrine System Disorders, Hereditary Disorder, Organismal Injury and Abnormalities	RET mutation positive medullary thyroid cancer	Symptomatic stage locally advanced RET mutation positive medullary thyroid cancer	0.0013	EGFR,RET	2
Cancer, Endocrine System Disorders, Organismal Injury and Abnormalities	RET mutation negative medullary thyroid cancer	Symptomatic stage metastatic RET mutation negative medullary thyroid cancer	0.0013	EGFR,RET	2
Cancer, Endocrine System Disorders, Hereditary Disorder, Organismal Injury and Abnormalities	RET mutation positive medullary thyroid cancer	Symptomatic stage metastatic RET mutation positive medullary thyroid cancer	0.0013	EGFR,RET	2
Cancer, Endocrine System Disorders, Organismal Injury and Abnormalities	RET mutation negative medullary thyroid cancer	Symptomatic stage unresectable RET mutation negative medullary thyroid cancer	0.0013	EGFR,RET	2
Cancer, Endocrine System Disorders, Hereditary Disorder, Organismal Injury and Abnormalities	RET mutation positive medullary thyroid cancer	Symptomatic stage unresectable RET mutation positive medullary thyroid cancer	0.0013	EGFR,RET	2
Cancer, Endocrine System Disorders, Organismal Injury and Abnormalities, Tumor Morphology	progressive medullary thyroid cancer	Unresectable progressive medullary thyroid cancer	0.0013	EGFR,RET	2
Cancer, Organismal Injury and Abnormalities, Tumor Morphology	adenocarcinoma	Progressive adenocarcinoma	0.00133	AR,EGFR,MAP2K2,RET,CLDN18	5
Organismal Development, Organismal Injury and Abnormalities	abnormal morphology	Abnormal morphology of head	0.00134	POT1,EGFR,CRKL,MECP2,SATB2,NCAM2,SP8,DVL1,SPRED1,SPARC,ANK3,ACVR1B,ARNT2,PROS1,KLF7,RYK,GRIA2,MAP2K2,HMX2,ARID3B,ECE2,THRB	22
Cancer, Organismal Injury and Abnormalities, Tumor Morphology	advanced cancer	Progressive advanced cancer	0.00134	AR,EGFR,CSF2RA,CLDN18,MAP2K2,RET	6
Cancer, Hematological Disease, Immunological Disease, Organismal Injury and Abnormalities	B-cell lymphoma	B-cell lymphoma	0.00136	POT1,TRIM55,BNC2,EGFR,KCNRG,CHEK2,SVEP1,SATB2,ESPL1,RET,TNFRSF8,CEP350,SHROOM3,RTTN,GSR,PTPRE,TFCP2,TTN,EWSR1,ECE2,SHISA9	21
Cancer, Organismal Injury and Abnormalities	malignant solid tumor	Recurrent malignant solid tumor	0.00139	AR,EGFR,GSR,CSF2RA,RET,MAP2K2,TNFRSF8	7
Cancer, Endocrine System Disorders, Organismal Injury and Abnormalities	small-cell carcinoma	Small-cell carcinoma	0.00141	AR,GPER1,EGFR,CEP41,CHEK2,PTPRE,MAP2K2,RET	8
Cancer, Endocrine System Disorders, Organismal Injury and Abnormalities	thyroid cancer	Locally advanced thyroid cancer	0.00143	EGFR,RET,MAP2K2	3
Cellular Movement	migration	Migration of kidney cancer cell lines	0.00143	AR,NRP1,TIAM1	3
Cell Cycle	S phase	S phase of carcinoma cell lines	0.00143	EGFR,DESI2,CHEK2	3
Cardiovascular Disease, Organismal Injury and Abnormalities	vascular malformation	Vascular malformation	0.00145	EGFR,NRP1,PITPNM3,DVL1	4
Cancer, Organismal Injury and Abnormalities, Respiratory Disease	laryngeal squamous cell carcinoma	Laryngeal squamous cell carcinoma	0.00147	EGFR,CCAT1,SVEP1,LRPPRC,RET,PKHD1L1,PCM1,HEATR1,CEP350,MAN2B2,TSHZ3,NRP1,TTN,TG	14
Embryonic Development, Organismal Development	development	Development of body trunk	0.00152	TRIM55,HOXC8,AKAP13,MECP2,LSR,RET,OBSCN,TSHZ3,PNPLA2,DNAI1,ARID3B,ECE2,CTSS,EGFR,LMOD2,CRKL,SPARC,ADAMTS1,AR,CTSH,KLF7,NRP1,MAP2K2,MYLK,TTN	25
Developmental Disorder, Embryonic Development, Organismal Development, Tissue Morphology	abnormal morphology	Abnormal morphology of first branchial arch	0.00158	AKAP13,SATB2,NRP1	3
Organismal Development	fat body mass	Fat body mass	0.00158	AR,GPER1,PER3	3
Cancer, Organismal Injury and Abnormalities	advanced solid tumor	Relapsed advanced solid tumor	0.00158	EGFR,MAP2K2,TNFRSF8	3
Cancer, Organismal Injury and Abnormalities	malignant solid tumor	Advanced malignant solid tumor	0.00159	EGFR,HAX1,mir-33,CHEK2,NF2,CCAT1,CSF2RA,ESPL1,CLDN18,RET,TNFRSF8,ADAMTS1,ANK3,AR,GSR,DPYSL3,MAP2K2,RPS11,THRB	19
Cancer, Organismal Injury and Abnormalities	thoracic neoplasm	Thoracic neoplasm	0.0016	HAX1,CHEK2,SATB2,ESPL1,LSR,RET,GPER1,DESI2,CEP41,TSHZ3,SPOPL,RPS11,LANCL2,TG,RNF216,BACH2,EGFR,SCN10A,NF2,CSMD1,CRKL,SVEP1,ANXA3,TUG1,TNFRSF8,PKHD1L1,AHNAK2,PDHA1,SPARC,ADAMTS1,ACVR1B,AR,ZKSCAN1,UBN1,HSD17B4,DPYSL3,PTPRE,MAP2K2,TTN,IGSF9,THRB,P4HB	42
Cancer, Hematological Disease, Immunological Disease, Organismal Injury and Abnormalities	B-cell non-Hodgkin disease	B-cell non-Hodgkin lymphoma	0.00162	POT1,TRIM55,BNC2,EGFR,KCNRG,CHEK2,SVEP1,SATB2,RET,TNFRSF8,CEP350,SHROOM3,RTTN,GSR,PTPRE,TFCP2,TTN,EWSR1,ECE2,SHISA9	20
Cancer, Hematological Disease, Immunological Disease, Organismal Injury and Abnormalities	B cell cancer	B cell cancer	0.00162	POT1,BACH2,TRIM55,BNC2,EGFR,KCNRG,CHEK2,SVEP1,SATB2,ESPL1,RET,TNFRSF8,CEP350,SHROOM3,STRN3,RTTN,NRP1,GSR,PTPRE,TFCP2,TTN,EWSR1,ECE2,SHISA9	24
Lipid Metabolism, Molecular Transport, Small Molecule Biochemistry	concentration	Concentration of cholesterol	0.00164	AR,CTSS,GPER1,mir-33,MOGAT2,MECP2,KCNE3,LSR,TG,THRB	10
Cancer, Organismal Injury and Abnormalities	BRAF mutation negative melanoma	Stage III BRAF mutation negative melanoma	0.00164	EGFR,CSF2RA,RET,MAP2K2	4
Cancer, Organismal Injury and Abnormalities	BRAF mutation negative melanoma	Unresectable BRAF mutation negative melanoma	0.00164	EGFR,CSF2RA,RET,MAP2K2	4
Cancer, Organismal Injury and Abnormalities	metastatic carcinoma	Metastatic carcinoma	0.00166	AR,EGFR,CCAT1,CLDN18,RET,MAP2K2,RPS11,ADAMTS1	8
Cardiovascular Disease, Organismal Injury and Abnormalities, Skeletal and Muscular Disorders	atrial fibrillation	Atrial fibrillation	0.00169	AR,SCN10A,KCNE3,PTPRE,TTN,THRB	6
Cancer, Organismal Injury and Abnormalities, Reproductive System Disease	invasive breast cancer	Invasive breast cancer	0.0017	AR,EGFR,CSF2RA,PTPRE,MYLK,RET,MAP2K2,OBSCN,ADAMTS1,LTBP4	10
Cellular Movement	invasion	Invasion of cells	0.0017	CTSS,EGFR,HAX1,NF2,LAMA1,CCAT1,CRKL,SATB2,RET,OBSCN,TIAM1,DVL1,SPARC,ADAMTS1,ANK3,AR,CTSH,TBXA2R,NRP1,DPYSL3,MAP2K2,MYLK,THRB	23
Cell Cycle	S phase	Arrest in S phase of lung cancer cell lines	0.00173	DESI2,CHEK2	2
Connective Tissue Development and Function, Tissue Morphology	mass	Mass of perirenal white adipose tissue	0.00173	AR,GPER1	2
Connective Tissue Disorders, Organismal Injury and Abnormalities, Skeletal and Muscular Disorders	osteopenia	Osteopenia of femur	0.00173	AR,NRP1	2
Cancer, Organismal Injury and Abnormalities	BRAF mutation negative melanoma	Stage IV BRAF mutation negative melanoma	0.00173	CSF2RA,MAP2K2	2
Organismal Survival	organismal death	Organismal death	0.00175	TRIM55,AKAP13,HAX1,CHEK2,YTHDC1,MECP2,SATB2,ESPL1,LSR,RET,SPRED1,ARNT2,PROS1,TBXA2R,TSHZ3,PNPLA2,GRIA2,PNPLA8,HMX2,RNF216,PTGIR,ARID3B,ECE2,POT1,EGFR,LMOD2,NF2,LAMA1,LRPPRC,NOP2,CRKL,PPP1R9A,DVL1,PDHA1,HCN4,ADAMTS1,ACVR1B,ANK3,AR,KLF7,RYK,NRP1,HSD17B4,TTN,EWSR1,THRB	46
Gastrointestinal Disease, Hepatic System Disease, Organismal Injury and Abnormalities	hepatocellular dysplasia	Hepatocellular dysplasia	0.00175	GPER1,STRN3,RET	3
Cancer, Gastrointestinal Disease, Organismal Injury and Abnormalities	primary colon adenocarcinoma	Primary colon adenocarcinoma	0.00175	EGFR,CCAT1,RET	3
Developmental Disorder	hypoplasia	Hypoplasia of organ	0.00182	CTSS,BACH2,AKAP13,EGFR,HAX1,LAMA1,LSR,RET,AR,PROS1,SPRR3,TTN,ECE2	13
Cancer, Organismal Injury and Abnormalities	serous adenocarcinoma	Serous adenocarcinoma	0.00184	NKTR,EGFR,CHEK2,NF2,CSMD1,CRKL,ANXA3,ESPL1,AHNAK2,HCN4,ACVR1B,AR,CEP41,TSHZ3,SDK1,GRIA2,MAP2K2,MYLK,SLC25A12,TTN,TG	21
Cell-To-Cell Signaling and Interaction, Nervous System Development and Function	action potential	Action potential of neurons	0.00186	MECP2,GRIA2,KCNT1,SPRED1,SHISA9,ANK3	6
Cancer, Organismal Injury and Abnormalities, Skeletal and Muscular Disorders	musculoskeletal cancer	Musculoskeletal cancer	0.00187	AR,NKTR,EGFR,CHEK2,RET,TTN,EWSR1	7
Cancer, Organismal Injury and Abnormalities, Tumor Morphology	malignant solid tumor	Progressive malignant solid tumor	0.00187	AR,EGFR,CSF2RA,ANXA3,CLDN18,RET,MAP2K2	7
Cancer, Hematological Disease, Immunological Disease, Organismal Injury and Abnormalities	plasma cell myeloma	Plasma cell myeloma	0.00188	EGFR,CEP41,STRN3,CHEK2,CSMD1,GSR,CSF2RA,PTPRE,RET	9
Cancer, Organismal Injury and Abnormalities, Reproductive System Disease	carcinoma	Breast carcinoma	0.00188	HAX1,CHEK2,ESPL1,RET,DNAH1,OBSCN,PCM1,TRIM3,ZNF703,RTTN,TSHZ3,ZNF45,AFF2,GRIA2,MPP6,LTBP4,NKTR,EGFR,NF2,PKHD1L1,KCNT1,HEATR1,FRYL,ADAMTS1,ACVR1B,AR,SDK1,PTPRE,MAP2K2,MYLK,SLC25A12,TTN,P4HB	33
Cellular Development, Cellular Growth and Proliferation, Nervous System Development and Function, Tissue Development	proliferation	Proliferation of neuronal cells	0.0019	EGFR,NF2,LAMA1,RET,TIAM1,NCAM2,DVL1,TRIM3,ANK3,AR,KLF7,NRP1,DPYSL3,IGSF9,EWSR1	15
Gastrointestinal Disease, Organismal Injury and Abnormalities	disorder of appendix	Disorder of appendix	0.00193	SCN10A,CHEK2,SATB2	3
Cardiovascular Disease, Connective Tissue Disorders, Hematological Disease, Hereditary Disorder, Organismal Injury and Abnormalities	sickle cell anemia	Sickle cell anemia	0.00194	GPER1,STRN3,PTPRE,RET,SPARC	5
Cancer, Organismal Injury and Abnormalities	melanoma	Stage 3 unresectable melanoma	0.00195	EGFR,CSF2RA,MAP2K2,RET	4
Developmental Disorder, Hereditary Disorder, Organismal Injury and Abnormalities	familial midline defect	Familial midline defect	0.00201	CRKL,NRP1,SATB2,DVL1,ECE2	5
Cellular Development, Cellular Growth and Proliferation, Embryonic Development, Organ Development, Organismal Development, Skeletal and Muscular System Development and Function, Tissue Development	formation	Formation of muscle cells	0.00203	AR,AKAP13,LMOD2,LAMA1,MYLK,OBSCN,TTN	7
Cancer, Hematological Disease, Immunological Disease, Organismal Injury and Abnormalities	T-cell large granular lymphocytic leukemia	T-cell large granular lymphocytic leukemia	0.00206	GPER1,CEP41,RET,PTPRE	4
Cancer, Organismal Injury and Abnormalities	stage III melanoma	Unresectable stage III melanoma	0.00206	EGFR,CSF2RA,MAP2K2,RET	4
Cancer, Gastrointestinal Disease, Organismal Injury and Abnormalities, Tumor Morphology	metastatic colorectal adenocarcinoma	Progressive metastatic colorectal adenocarcinoma	0.00211	EGFR,RET,MAP2K2	3
Cell Cycle	quiescence	Quiescence	0.00211	NRP1,SPARC,THRB	3
Embryonic Development, Endocrine System Development and Function, Organ Development, Organismal Development, Tissue Development	development	Thyroid gland development	0.00211	CRKL,RET,MAP2K2	3
Cellular Movement	cell movement	Cell movement of tumor cell lines	0.00213	EGFR,HAX1,mir-33,NF2,CCAT1,CRKL,SATB2,RET,TNFRSF8,PIK3R5,TIAM1,TRIM3,SPARC,GNB2,AR,GPER1,CTSH,TBXA2R,HAND2-AS1,NRP1,GRIA2,MAP2K2,THRB	23
Post-Translational Modification	phosphorylation	Phosphorylation of protein	0.00216	EGFR,CHEK2,LAMA1,NF2,CRKL,RET,OBSCN,TNFRSF8,NLK,DVL1,ACVR1B,AR,GPER1,NRP1,MAP2K2,FAM129A,STAP1	17
Cancer, Organismal Injury and Abnormalities, Reproductive System Disease	breast or ovarian cancer	Breast or ovarian cancer	0.00217	HOXC8,AKAP13,HAX1,SATB2,ESPL1,LSR,DNAH1,OBSCN,PIK3R5,SP8,TRIM3,GPER1,CEP41,TBXA2R,STRN3,TSHZ3,ZNF45,GSR,AFF2,ARID3B,EGFR,SCN10A,NF2,LAMA1,CSMD1,LRPPRC,CRKL,HEATR1,FRYL,ADAMTS1,ACVR1B,AR,NRP1,MYLK,P4HB,CHEK2,CSF2RA,RET,PCM1,ZNF703,RTTN,GRIA2,MPP6,TG,LTBP4,NKTR,ANXA3,PKHD1L1,AHNAK2,KCNT1,HCN4,SPARC,MAN2B2,SDK1,PTPRE,MAP2K2,SLC25A12,TTN	58
Nervous System Development and Function, Tissue Morphology	density	Density of neurons	0.00217	MECP2,SDK1,RET,TIAM1,PPP1R9A,TRIM3	6
Cancer, Neurological Disease, Organismal Injury and Abnormalities	brain metastasis	Brain metastasis	0.00217	EGFR,GSR,MAP2K2,RET	4
Cancer, Neurological Disease, Organismal Injury and Abnormalities	nerve sheath tumor	Nerve sheath tumor	0.00217	EGFR,NF2,NOP2,RET	4
Cancer, Gastrointestinal Disease, Organismal Injury and Abnormalities	gastrointestinal carcinoma	Metastatic gastrointestinal carcinoma	0.00218	EGFR,CCAT1,CLDN18,MAP2K2,RET	5
Cancer, Organismal Injury and Abnormalities	metastatic solid tumor	Stage IV metastatic solid tumor	0.00218	AR,EGFR,CSF2RA,MAP2K2,RET	5
Cancer, Organismal Injury and Abnormalities, Respiratory Disease	ALK fusion positive squamous cell carcinoma of the lung	Advanced ALK fusion positive squamous cell carcinoma of the lung	0.00221	EGFR,RET	2
Cancer, Organismal Injury and Abnormalities	ALK rearrangement positive large cell carcinoma	Advanced ALK rearrangement positive large cell carcinoma	0.00221	EGFR,RET	2
Cancer, Organismal Injury and Abnormalities, Respiratory Disease	ALK rearrangement positive large cell lung carcinoma	Advanced ALK rearrangement positive large cell lung carcinoma	0.00221	EGFR,RET	2
Cancer, Organismal Injury and Abnormalities, Respiratory Disease	ALK rearrangement positive lung adenocarcinoma	Advanced ALK rearrangement positive lung adenocarcinoma	0.00221	EGFR,RET	2
Cancer, Organismal Injury and Abnormalities, Respiratory Disease	ALK rearrangement positive lung squamous cell carcinoma	Advanced ALK rearrangement positive lung squamous cell carcinoma	0.00221	EGFR,RET	2
Cancer, Organismal Injury and Abnormalities	ALK rearrangement positive large cell carcinoma	Metastatic ALK rearrangement positive large cell carcinoma	0.00221	EGFR,RET	2
Cancer, Organismal Injury and Abnormalities, Respiratory Disease, Tumor Morphology	ALK fusion positive squamous cell carcinoma of the lung	Metastatic progressive ALK fusion positive squamous cell carcinoma of the lung	0.00221	EGFR,RET	2
Cancer, Organismal Injury and Abnormalities, Tumor Morphology	ALK rearrangement positive large cell carcinoma	Progressive ALK rearrangement positive large cell carcinoma	0.00221	EGFR,RET	2
Cancer, Hematological Disease, Immunological Disease, Organismal Injury and Abnormalities	chronic leukemia	Chronic leukemia	0.00225	POT1,BACH2,NETO1,SVEP1,CSF2RA,RET,ETNK1,TRIM3,FRYL,STRN3,NRP1,MRPL51,PTPRE,TTN	14
Connective Tissue Disorders, Organismal Injury and Abnormalities, Skeletal and Muscular Disorders	bone lesion	Bone lesion	0.00228	NKTR,AR,EGFR,NF2,CHEK2,NRP1,RET,TTN,SPARC	9
Cancer, Organismal Injury and Abnormalities, Respiratory Disease	lung tumor	Lung tumor	0.00229	HAX1,CHEK2,SATB2,ESPL1,LSR,RET,GPER1,DESI2,CEP41,TSHZ3,SPOPL,RPS11,LANCL2,TG,RNF216,BACH2,EGFR,SCN10A,NF2,CSMD1,CRKL,SVEP1,ANXA3,TUG1,PKHD1L1,AHNAK2,PDHA1,SPARC,ADAMTS1,ACVR1B,AR,ZKSCAN1,UBN1,HSD17B4,DPYSL3,PTPRE,MAP2K2,TTN,IGSF9,THRB,P4HB	41
Cell Signaling	protein kinase cascade	Protein kinase cascade	0.0023	AKAP13,EGFR,NF2,CRKL,CSF2RA,RET,SPRED1,AR,SETX,GPER1,DNAJC27,RYK,MAP2K2	13
Cancer, Connective Tissue Disorders, Organismal Injury and Abnormalities	osteosarcomagenesis	Osteosarcoma	0.00236	NKTR,NF2,CHEK2,NRP1,RET,TTN,EWSR1,SPARC	8
Cellular Assembly and Organization, Cellular Function and Maintenance, Tissue Development	formation	Formation of actin filaments	0.00236	AR,AKAP13,EGFR,HAX1,LMOD2,NF2,MYLK,TIAM1,PPP1R9A,SPARC	10
Developmental Disorder	hypoplasia	Hypoplasia	0.00239	CTSS,BACH2,AKAP13,EGFR,HAX1,LAMA1,SATB2,LSR,RET,AR,PROS1,SPRR3,TTN,ECE2	14
Cellular Movement	migration	Migration of cells	0.00241	HAX1,CCAT1,MECP2,CSF2RA,SATB2,RET,PIK3R5,PCM1,ZNF703,GPER1,PROS1,TBXA2R,GRIA2,TG,PTGIR,CTSS,BACH2,EGFR,PLEKHO1,mir-33,NF2,LAMA1,CRKL,ANXA3,KCNE3,TNFRSF8,TIAM1,SPARC,ADAMTS1,AR,APPL1,CTSH,HAND2-AS1,NRP1,DPYSL3,MAP2K2,MYLK,STAP1,PTMA,THRB	40
Developmental Disorder	midline defect	Midline defect	0.00241	AR,EGFR,RYK,CRKL,NRP1,SATB2,SP8,DVL1,ECE2	9
Endocrine System Disorders, Organismal Injury and Abnormalities, Reproductive System Disease	hypopituitarism	Hypopituitarism	0.00242	AR,ARNT2,RNF216,THRB	4
Organismal Development	development	Development of endocrine gland	0.00245	CTSS,EGFR,CRKL,MAP2K2,RET,ADAMTS1	6
Embryonic Development, Nervous System Development and Function, Organ Development, Organismal Development, Tissue Development	formation	Formation of brain	0.00245	EGFR,C12orf57,NF2,CRKL,MECP2,ANK3,ARNT2,RYK,AFF2,TACC2,HMX2,TTN,TG,THRB	14
Embryonic Development, Nervous System Development and Function, Organ Development, Organismal Development, Tissue Development	formation	Formation of corpus callosum	0.00252	C12orf57,RYK,TG	3
Nervous System Development and Function, Organ Morphology, Tissue Morphology	quantity	Quantity of hair cells	0.00252	HMX2,DVL1,THRB	3
Cancer, Gastrointestinal Disease, Hepatic System Disease, Organismal Injury and Abnormalities	biliary tract carcinoma	Biliary tract carcinoma	0.00253	EGFR,AKAP13,CSMD1,SVEP1,RET,TRAPPC13,FRYL,ANK3,SETX,RTTN,GSR,FAM129A,IMPG2,TTN,TG,ZBTB41	16
Cancer, Gastrointestinal Disease, Hepatic System Disease, Organismal Injury and Abnormalities	liver metastasis	Liver metastasis	0.00255	EGFR,NF2,RET,DPYSL3	4
Cell Death and Survival	cell viability	Cell viability of breast cancer cell lines	0.00257	EGFR,CRKL,NRP1,PTPRE,RET,NLK,PDHA1,ADAMTS1	8
Auditory Disease, Organismal Injury and Abnormalities	abnormality	Abnormality of ear	0.0026	EGFR,NF2,RET,HMX2,DVL1,THRB,ECE2	7
Cellular Movement	migration	Migration of hepatoma cell lines	0.00263	AR,CTSH,EGFR,HAND2-AS1,THRB	5
Cancer, Organismal Injury and Abnormalities	multiple primary neoplasms	Multiple primary neoplasms	0.00268	EGFR,NF2,CCAT1,RET	4
Cancer, Organismal Injury and Abnormalities	metastasis	Secondary tumor	0.00272	EGFR,HAX1,mir-33,CHEK2,NF2,CCAT1,CSF2RA,ESPL1,CLDN18,RET,TNFRSF8,PIK3R5,ADAMTS1,ANK3,AR,CTSH,NRP1,GSR,DPYSL3,MAP2K2,RPS11,THRB	22
Cell Morphology, Nervous System Development and Function, Tissue Morphology	size	Size of neurons	0.00273	AR,MECP2,RET,DPYSL3,TIAM1	5
Cardiovascular Disease, Developmental Disorder, Hereditary Disorder, Organismal Injury and Abnormalities, Respiratory Disease	persistent truncus arteriosus	Persistent truncus arteriosus	0.00274	NRP1,DVL1,ECE2	3
Ophthalmic Disease, Organismal Injury and Abnormalities	strabismus	Strabismus	0.00274	SETX,SCN10A,PIK3R5	3
Cancer, Organismal Injury and Abnormalities	visceral metastasis	Visceral metastasis	0.00274	AR,EGFR,mir-33,NF2,CCAT1,ESPL1,RET,MAP2K2,DPYSL3,ADAMTS1,THRB,ANK3	12
Cell Morphology, Cellular Assembly and Organization, Cellular Development, Cellular Function and Maintenance, Cellular Growth and Proliferation, Nervous System Development and Function, Organismal Development, Tissue Development	branching	Branching of neurons	0.00275	KLF7,RYK,MECP2,SDK1,DPYSL3,TIAM1,PPP1R9A,NCAM2,IGSF9,TRIM3	10
Cell Morphology	shape change	Shape change of neurites	0.00275	KLF7,RYK,MECP2,NRP1,SDK1,TIAM1,PPP1R9A,NCAM2,IGSF9,TRIM3	10
Cancer, Organismal Injury and Abnormalities	ALK inversion positive malignant neoplasm	ALK inversion positive malignant neoplasm	0.00275	EGFR,RET	2
Cancer, Organismal Injury and Abnormalities	ALK rearrangement positive extracranial solid tumor	ALK rearrangement positive extracranial solid tumor	0.00275	EGFR,RET	2
Cancer, Organismal Injury and Abnormalities	ALK translocation positive malignant solid tumor	ALK translocation positive malignant solid tumor	0.00275	EGFR,RET	2
Developmental Disorder, Hereditary Disorder, Neurological Disease, Organismal Injury and Abnormalities	Smith-Magenis syndrome-like disorder	Smith-Magenis syndrome-like disorder	0.00275	MECP2,MAP2K2	2
Cancer, Organismal Injury and Abnormalities, Tumor Morphology	transformation	Transformation of tumor	0.00275	EGFR,TIAM1	2
Cancer, Gastrointestinal Disease, Organismal Injury and Abnormalities	advanced colon carcinoma	Unresectable advanced colon carcinoma	0.00275	EGFR,MAP2K2	2
Cancer, Gastrointestinal Disease, Organismal Injury and Abnormalities	colon adenocarcinoma	Unresectable colon adenocarcinoma	0.00275	EGFR,MAP2K2	2
Cancer, Gastrointestinal Disease, Organismal Injury and Abnormalities	rectum cancer	Unresectable rectum cancer	0.00275	EGFR,MAP2K2	2
Cell-To-Cell Signaling and Interaction, Cellular Assembly and Organization	fusion	Fusion of muscle cells	0.00282	AR,PLEKHO1,LAMA1,PTGIR	4
Cardiovascular System Development and Function, Cellular Development, Cellular Function and Maintenance, Cellular Growth and Proliferation, Organismal Development, Tissue Development	cell proliferation	Cell proliferation of vascular endothelial cells	0.00286	EGFR,PROS1,TBXA2R,NRP1,PTGIR,LINC00599,SPARC	7
Embryonic Development, Organismal Development	development	Development of body axis	0.00287	BNC2,HOXC8,EGFR,C12orf57,NF2,CRKL,MECP2,SATB2,NCAM2,SP8,DVL1,SPARC,ANK3,ARNT2,RTTN,RYK,NRP1,AFF2,MAP2K2,TACC2,HMX2,TTN,TG,THRB	24
Cancer, Organismal Injury and Abnormalities	cancer	Stage II cancer	0.00291	EGFR,GSR,CSF2RA,MAP2K2,RET,TNFRSF8	6
Cancer, Organismal Injury and Abnormalities	thoracic cancer	Thoracic cancer	0.00292	CHEK2,SATB2,ESPL1,LSR,RET,GPER1,DESI2,CEP41,TSHZ3,SPOPL,RPS11,LANCL2,TG,RNF216,BACH2,EGFR,NF2,CSMD1,CRKL,SVEP1,ANXA3,TUG1,TNFRSF8,PKHD1L1,AHNAK2,PDHA1,SPARC,ADAMTS1,ACVR1B,AR,ZKSCAN1,UBN1,HSD17B4,DPYSL3,PTPRE,MAP2K2,IGSF9,TTN,THRB,P4HB	40
Cell Death and Survival	cell death	Cell death of motor neurons	0.00296	AR,TSHZ3,GRIA2,DPYSL3	4
Cell Cycle, Connective Tissue Development and Function	mitogenesis	Mitogenesis of fibroblast cell lines	0.00297	EGFR,RET,SPARC	3
Cell Morphology, Cellular Assembly and Organization, Cellular Function and Maintenance	reorganization	Reorganization of cytoskeleton	0.00307	AR,EGFR,CRKL,NRP1,RET,TIAM1,DVL1	7
Cancer, Endocrine System Disorders, Organismal Injury and Abnormalities, Respiratory Disease	small cell lung cancer	Small cell lung carcinoma	0.00314	GPER1,EGFR,CEP41,CHEK2,PTPRE,MAP2K2,RET	7
Cancer, Organismal Injury and Abnormalities	metastatic adenocarcinoma	Metastatic adenocarcinoma	0.00317	AR,EGFR,CCAT1,CLDN18,MAP2K2,RET	6
Cancer, Organismal Injury and Abnormalities	blue round small cell tumor	Blue round small cell tumor	0.0032	EGFR,CHEK2,LRPPRC,CRKL,CSF2RA,RET,AR,SETX,GPER1,CEP41,PTPRE,MAP2K2,TTN,TG,LTBP4	15
Cancer, Gastrointestinal Disease, Organismal Injury and Abnormalities	esophageal carcinoma	Esophageal carcinoma	0.0032	EGFR,SCN10A,ACSS3,AHNAK2,DVL1,CEP350,TSHZ3,PTPRE,DPYSL3,PNPLA8,TTN,TG,PTGIR,ARID3B,LTBP4	15
Cancer, Organismal Injury and Abnormalities	malignant neoplasm of connective or soft tissue of abdomen	Malignant neoplasm of connective or soft tissue of abdomen	0.0032	EGFR,SCN10A,RET,PKHD1L1,TIAM1,TNFRSF8,CLEC18B,DAPL1,AR,TSHZ3,GSR,HSD17B4,MAP2K2,MYLK,TTN	15
Cancer, Organismal Injury and Abnormalities, Renal and Urological Disease	renal cancer	Renal cancer	0.0032	EGFR,CHEK2,NF2,NOP2,CSMD1,RET,PIK3R5,PKHD1L1,MYBPC1,SPARC,ACVR1B,AR,STRN3,RTTN,TSHZ3,UBE4A,MRPL51,HSD17B4,PTPRE,TTN,ZNF532,EWSR1,KLHL18,THRB	24
Developmental Disorder, Embryonic Development, Organismal Development, Tissue Morphology	abnormal morphology	Abnormal morphology of visceral endoderm	0.00321	LAMA1,NF2,ACVR1B	3
Cell Death and Survival, Cell Morphology, Nervous System Development and Function, Neurological Disease, Tissue Morphology	loss	Loss of sensory neurons	0.00321	KLF7,RET,THRB	3
Developmental Disorder, Embryonic Development, Organismal Development, Tissue Morphology	abnormal morphology	Abnormal morphology of branchial arch	0.00326	AKAP13,SATB2,NRP1,ARID3B	4
Cancer, Organismal Injury and Abnormalities	mucosal melanoma	Mucosal melanoma	0.00326	EGFR,RET,MAP2K2,TTN	4
Cancer, Gastrointestinal Disease, Organismal Injury and Abnormalities	malignant gastrointestinal neoplasm	Unresectable malignant gastrointestinal neoplasm	0.00326	EGFR,MAP2K2,RET,CLDN18	4
Cancer, Hematological Disease, Immunological Disease, Organismal Injury and Abnormalities	non-Hodgkin disease	Non-Hodgkin lymphoma	0.0033	POT1,TRIM55,BNC2,EGFR,KCNRG,CHEK2,SVEP1,CSF2RA,SATB2,RET,TNFRSF8,PIK3R5,CEP350,SPARC,CTSH,SHROOM3,RTTN,GSR,PTPRE,TFCP2,TTN,EWSR1,ECE2,SHISA9	24
Cancer, Endocrine System Disorders, Organismal Injury and Abnormalities	neuroendocrine tumor	Neuroendocrine tumor	0.00333	CTSS,BNC2,EGFR,AKAP13,SCN10A,LMOD2,CHEK2,RET,OBSCN,AR,SETX,GPER1,CEP41,PTPRE,MAP2K2,TTN,THRB	17
Cell Cycle	interkinetic nuclear migration	Interkinetic nuclear migration	0.00335	PCM1,TACC2	2
Cancer, Organismal Injury and Abnormalities	metastasis	Metastasis of pancreatic cancer cell lines	0.00335	EGFR,NF2	2
Cancer, Dermatological Diseases and Conditions, Developmental Disorder, Hereditary Disorder, Neurological Disease, Organismal Injury and Abnormalities	neurofibromatosis	Neurofibromatosis	0.00335	NF2,SPRED1	2
Cardiovascular Disease, Organismal Injury and Abnormalities	Raynaud disease	Raynaud disease	0.00335	SCN10A,PTGIR	2
Cancer, Organismal Injury and Abnormalities	melanoma	Stage I melanoma	0.00335	CSF2RA,MAP2K2	2
Cancer, Organismal Injury and Abnormalities, Respiratory Disease	recurrent non-small cell lung cancer	Stage IIIB recurrent non-small cell lung cancer	0.00335	EGFR,RET	2
Cell-To-Cell Signaling and Interaction, Cellular Assembly and Organization	cell-cell contact	Cell-cell contact	0.00341	EGFR,PLEKHO1,NF2,LAMA1,CRKL,MECP2,RET,TIAM1,PPP1R9A,NCAM2,DVL1,ANK3,AR,MYLK,IGSF9,PTGIR	16
Cancer, Organismal Injury and Abnormalities	pelvic tumor	Recurrent pelvic tumor	0.00342	AR,EGFR,MAP2K2,RET	4
Cancer, Organismal Injury and Abnormalities	cancer	Stage I-II cancer	0.00344	EGFR,GSR,CSF2RA,MAP2K2,RET,RPS11,TNFRSF8	7
Nervous System Development and Function	morphology	Morphology of nervous system	0.00345	POT1,AKAP13,EGFR,CRKL,MECP2,RET,TIAM1,PCM1,PPP1R9A,NCAM2,DVL1,ANK3,AR,ARNT2,PROS1,KLF7,NRP1,GRIA2,DPYSL3,HMX2,IGSF9,THRB	22
Cancer, Organismal Injury and Abnormalities	connective or soft tissue tumor	Connective or soft tissue tumor	0.00346	CHEK2,CSF2RA,RET,SETX,TSHZ3,GSR,GRIA2,RPS3A,TG,LTBP4,NKTR,EGFR,SCN10A,NF2,LRPPRC,CRKL,TNFRSF8,PKHD1L1,TIAM1,CLEC18B,DAPL1,DVL1,SPARC,AR,NRP1,HSD17B4,MAP2K2,MYLK,TTN,EWSR1	30
Cancer, Gastrointestinal Disease, Organismal Injury and Abnormalities	small intestine carcinoma	Small intestine carcinoma	0.00347	EGFR,SATB2,ACVR1B	3
Cancer, Organismal Injury and Abnormalities	soft tissue sarcoma cancer	Soft tissue sarcoma	0.00348	EGFR,SCN10A,NF2,LRPPRC,CRKL,CSF2RA,RET,TNFRSF8,PKHD1L1,TIAM1,CLEC18B,DAPL1,AR,SETX,TSHZ3,GSR,HSD17B4,MAP2K2,MYLK,TTN,TG,LTBP4	22
Organismal Development, Skeletal and Muscular System Development and Function	morphology	Morphology of limb	0.00352	AR,TRIM55,GPER1,RYK,HSD17B4,SATB2,PTPRE,TTN,SP8	9
Endocrine System Disorders, Organismal Injury and Abnormalities	benign thyroid disease	Benign thyroid disease	0.00353	BACH2,SCN10A,ANXA3,RET,TG,THRB	6
Cancer, Organismal Injury and Abnormalities	adenocarcinoma	Locally advanced adenocarcinoma	0.00358	EGFR,MAP2K2,RET,CLDN18	4
Cardiovascular Disease, Hematological Disease, Metabolic Disease, Organismal Injury and Abnormalities	hyperlipidemia	Hyperlipidemia	0.00363	AR,CTSS,MOGAT2,LSR,STAP1,THRB	6
Cancer, Organismal Injury and Abnormalities	cancer	Stage I cancer	0.00363	EGFR,GSR,CSF2RA,MAP2K2,RET,RPS11	6
Cancer, Neurological Disease, Organismal Injury and Abnormalities	brain cancer	Brain cancer	0.00369	POT1,EGFR,NF2,NRP1,GSR,RET,MAP2K2,TTN	8
Cell Death and Survival	cell viability	Cell viability of tumor cell lines	0.00371	AKAP13,EGFR,CHEK2,NOP2,CCAT1,CRKL,RET,PPP1R9A,NLK,HEATR1,PDHA1,ADAMTS1,AR,SETX,NRP1,GSR,PTPRE,LANCL2,NUP58,EWSR1,P4HB	21
Cancer, Dermatological Diseases and Conditions, Organismal Injury and Abnormalities	desmoplastic melanoma cancer	Desmoplastic melanoma	0.00374	MAP2K2,SPRR3,TTN	3
Cardiovascular Disease, Developmental Disorder, Organismal Injury and Abnormalities	conotruncal heart malformations	Conotruncal heart malformations	0.00375	CRKL,NRP1,DVL1,ECE2	4
Cancer, Endocrine System Disorders, Organismal Injury and Abnormalities, Reproductive System Disease	ovarian serous tumor	Ovarian serous tumor	0.00382	NKTR,EGFR,CHEK2,NF2,CSMD1,CRKL,AHNAK2,HCN4,ACVR1B,AR,TSHZ3,SDK1,GRIA2,MAP2K2,SLC25A12,TTN,TG	17
Nervous System Development and Function, Tissue Morphology	quantity	Quantity of sensory neurons	0.00392	KLF7,HMX2,DVL1,THRB	4
Cancer, Organismal Injury and Abnormalities	malignant solid tumor	Locally advanced malignant solid tumor	0.00399	AR,EGFR,CLDN18,MAP2K2,RET	5
Cell Cycle	S phase	Arrest in S phase of carcinoma cell lines	0.00399	DESI2,CHEK2	2
Cell Cycle, Cell-To-Cell Signaling and Interaction, Cellular Growth and Proliferation, Hair and Skin Development and Function	contact growth inhibition	Contact growth inhibition of epithelial cell lines	0.00399	EGFR,PTMA	2
Cellular Movement	migration	Migration of endometrial cancer cell lines	0.00399	GPER1,SATB2	2
Cancer, Endocrine System Disorders, Organismal Injury and Abnormalities	poorly differentiated thyroid cancer	Poorly differentiated thyroid cancer	0.00399	RET,THRB	2
Hematological System Development and Function, Hematopoiesis, Humoral Immune Response, Lymphoid Tissue Structure and Development, Tissue Morphology	quantity	Quantity of transitional type 1 B lymphocytes	0.00399	AKAP13,HAX1	2
Cancer, Organismal Injury and Abnormalities	unresectable BRAF mutation positive melanoma	Stage III unresectable BRAF mutation positive melanoma	0.00399	CSF2RA,MAP2K2	2
Cancer, Gastrointestinal Disease, Organismal Injury and Abnormalities	advanced rectal adenocarcinoma	Advanced rectal adenocarcinoma	0.00402	EGFR,RET,MAP2K2	3
Cancer, Neurological Disease, Organismal Injury and Abnormalities	brainstem glioma	Brainstem glioma	0.00402	GSR,ZNF532,TTN	3
Embryonic Development, Nervous System Development and Function, Organ Development, Organismal Development, Tissue Development	formation	Formation of cerebral ventricles	0.00402	C12orf57,MECP2,TTN	3
Cancer, Organismal Injury and Abnormalities, Tumor Morphology	progression	Progression of carcinoma	0.00403	AR,EGFR,ANXA3,CLDN18,MAP2K2,RET	6
Gene Expression	transcription	Transcription of DNA	0.00407	HOXC8,HAX1,CHEK2,CIR1,MECP2,SATB2,RET,ZNF703,SETX,GPER1,ARNT2,STRN3,TSHZ3,PER3,ZNF45,LANCL2,ARID3B,BACH2,EGFR,NLK,DVL1,ACVR1B,AR,KLF7,UBN1,MAP2K2,TFCP2,PTMA,ZNF608,THRB	30
Cancer, Organismal Injury and Abnormalities, Tumor Morphology	progression	Progression of malignant tumor	0.00414	AR,EGFR,CSF2RA,ANXA3,CLDN18,RET,MAP2K2,ADAMTS1	8
Cellular Growth and Proliferation	colony formation	Colony formation	0.00428	BACH2,EGFR,TSPYL2,NF2,CCAT1,CSF2RA,RET,PIK3R5,OBSCN,TIAM1,DVL1,SPARC,AR,EWSR1,THRB	15
Cancer, Organismal Injury and Abnormalities	BRAF mutation positive malignant solid tumor	Metastatic BRAF mutation positive malignant solid tumor	0.00428	EGFR,CSF2RA,MAP2K2,RET	4
Cancer, Organismal Injury and Abnormalities	cancer	Stage III cancer	0.00429	EGFR,LAMA1,GSR,CSF2RA,RET,MAP2K2,TNFRSF8	7
Cellular Movement	invasion	Invasion of kidney cell lines	0.00431	EGFR,TBXA2R,DVL1	3
Cancer, Endocrine System Disorders, Organismal Injury and Abnormalities, Reproductive System Disease	ovarian adenocarcinoma	Ovarian adenocarcinoma	0.00433	HOXC8,CHEK2,SATB2,LSR,PIK3R5,OBSCN,TBXA2R,TSHZ3,GRIA2,TG,ARID3B,LTBP4,NKTR,EGFR,NF2,CRKL,LRPPRC,CSMD1,PKHD1L1,AHNAK2,HEATR1,HCN4,ACVR1B,AR,NRP1,SDK1,MAP2K2,SLC25A12,TTN	29
Cancer, Endocrine System Disorders, Organismal Injury and Abnormalities	extrapancreatic neuroendocrine tumor	Extrapancreatic neuroendocrine tumor	0.00436	BNC2,EGFR,AKAP13,SCN10A,LMOD2,CHEK2,RET,OBSCN,AR,SETX,GPER1,CEP41,PTPRE,MAP2K2,TTN,THRB	16
Cancer, Organismal Injury and Abnormalities, Respiratory Disease	lung cancer	Lung cancer	0.00437	CHEK2,SATB2,ESPL1,LSR,RET,GPER1,DESI2,CEP41,TSHZ3,SPOPL,RPS11,LANCL2,TG,RNF216,BACH2,EGFR,NF2,CSMD1,CRKL,SVEP1,ANXA3,TUG1,PKHD1L1,AHNAK2,PDHA1,SPARC,ADAMTS1,ACVR1B,AR,ZKSCAN1,UBN1,HSD17B4,DPYSL3,PTPRE,MAP2K2,TTN,IGSF9,THRB,P4HB	39
Cell Morphology, Cellular Function and Maintenance	length	Length of cells	0.00439	AR,LMOD2,MECP2,DPYSL3,PPP1R9A	5
Cancer, Organismal Injury and Abnormalities, Tumor Morphology	metastatic solid tumor	Progressive metastatic solid tumor	0.00439	AR,EGFR,CSF2RA,MAP2K2,RET	5
Amino Acid Metabolism, Post-Translational Modification, Small Molecule Biochemistry	phosphorylation	Phosphorylation of L-amino acid	0.00448	EGFR,HAX1,CHEK2,NRP1,MYLK,NLK,ACVR1B	7
Cancer, Organismal Injury and Abnormalities	adenocarcinoma	Primary adenocarcinoma	0.00453	EGFR,NF2,CCAT1,MAP2K2,RET	5
Cellular Movement, Hematological Disease, Immunological Disease, Inflammatory Disease, Inflammatory Response, Organismal Injury and Abnormalities, Respiratory Disease	allergic pulmonary eosinophilia	Allergic pulmonary eosinophilia	0.00461	CTSS,ANXA3,P4HB	3
Cellular Movement	cell movement	Cell movement of neuroblastoma cell lines	0.00461	EGFR,RET,TIAM1	3
Organ Morphology, Renal and Urological System Development and Function	quantity	Quantity of renal glomerulus	0.00461	RET,PNPLA8,SPARC	3
Cancer, Organismal Injury and Abnormalities, Respiratory Disease	lung adenocarcinoma	Lung adenocarcinoma	0.00462	CHEK2,SATB2,RET,GPER1,TSHZ3,SPOPL,LANCL2,EGFR,NF2,CSMD1,CRKL,SVEP1,ANXA3,PKHD1L1,AHNAK2,ACVR1B,AR,ZKSCAN1,UBN1,HSD17B4,PTPRE,MAP2K2,TTN,IGSF9,P4HB	25
Lipid Metabolism, Molecular Transport, Small Molecule Biochemistry	concentration	Concentration of prostaglandin	0.00467	EGFR,TBXA2R,PNPLA8,PTGIR	4
Developmental Disorder	rasopathy	Rasopathy	0.00467	EGFR,PITPNM3,MAP2K2,SPRED1	4
Cancer, Gastrointestinal Disease, Organismal Injury and Abnormalities	colon adenocarcinoma	Advanced colon adenocarcinoma	0.0047	EGFR,MAP2K2	2
Cell Death and Survival, Connective Tissue Development and Function	cell survival	Cell survival of fibroblast cell lines	0.0047	EGFR,APPL1	2
Cancer, Neurological Disease, Organismal Injury and Abnormalities	malignant neoplasm of meninges	Malignant neoplasm of meninges	0.0047	EGFR,NF2	2
Neurological Disease	pathological denervation	Pathological denervation	0.0047	AR,DPYSL3	2
Cancer, Organismal Injury and Abnormalities, Tumor Morphology	stage IV melanoma	Progressive stage IV melanoma	0.0047	CSF2RA,MAP2K2	2
Lipid Metabolism, Small Molecule Biochemistry	synthesis	Synthesis of thromboxane B2	0.0047	TBXA2R,PNPLA8	2
Post-Translational Modification	autophosphorylation	Autophosphorylation of protein	0.0047	EGFR,CHEK2,MAP2K2,OBSCN,NLK,ACVR1B	6
Cellular Movement	invasion	Invasion of carcinoma cell lines	0.0048	AR,CTSH,EGFR,HAX1,CCAT1,SATB2,MAP2K2,TIAM1	8
Cell Signaling	enzyme linked receptor protein signaling pathway	Enzyme linked receptor protein signaling pathway	0.00487	RET,PTPRE,STAP1,ACVR1B	4
Cancer, Organismal Injury and Abnormalities, Respiratory Disease	non-small cell lung cancer	Non-small cell lung carcinoma	0.00489	CHEK2,SATB2,RET,GPER1,CEP41,TSHZ3,SPOPL,LANCL2,RPS11,RNF216,EGFR,NF2,CSMD1,CRKL,SVEP1,ANXA3,TUG1,PKHD1L1,AHNAK2,SPARC,ADAMTS1,ACVR1B,AR,ZKSCAN1,UBN1,HSD17B4,PTPRE,MAP2K2,TTN,IGSF9,P4HB	31
Cardiovascular System Development and Function	morphology	Morphology of cardiovascular system	0.00492	TRIM55,AKAP13,EGFR,LMOD2,CRKL,RET,TIAM1,NLK,DVL1,HCN4,AR,GPER1,PROS1,NRP1,PNPLA2,TTN,TG,PTGIR,ARID3B,ECE2	20
Endocrine System Development and Function, Endocrine System Disorders, Organ Morphology, Organismal Development, Organismal Injury and Abnormalities, Reproductive System Disease	abnormal morphology	Abnormal morphology of pituitary gland	0.00493	ARNT2,HMX2,THRB	3
Endocrine System Disorders, Immunological Disease, Metabolic Disease, Organismal Injury and Abnormalities	Graves disease	Graves disease	0.00493	SCN10A,TG,THRB	3
Cell Morphology, Cellular Assembly and Organization, Cellular Development, Cellular Function and Maintenance, Cellular Growth and Proliferation, Nervous System Development and Function, Organismal Development, Tissue Development	formation	Formation of dendrites	0.00494	KLF7,CRKL,MECP2,NRP1,IGSF9,DVL1	6
Cancer, Endocrine System Disorders, Organismal Injury and Abnormalities, Reproductive System Disease	epithelial ovarian tumor	Ovarian carcinoma	0.00507	HOXC8,CHEK2,SATB2,LSR,PIK3R5,OBSCN,SP8,TBXA2R,TSHZ3,GRIA2,TG,ARID3B,LTBP4,NKTR,EGFR,NF2,LRPPRC,CSMD1,CRKL,PKHD1L1,AHNAK2,HEATR1,HCN4,ACVR1B,AR,NRP1,SDK1,MAP2K2,SLC25A12,TTN	30
Organismal Functions	hypoactivity	Hypoactivity of mice	0.00519	MECP2,HSD17B4,GRIA2,DECR1,SPARC,ANK3	6
Cancer, Organismal Injury and Abnormalities, Respiratory Disease	pulmonary metastasis	Pulmonary metastasis	0.00519	EGFR,ESPL1,RET,DPYSL3,ADAMTS1,THRB	6
Cellular Assembly and Organization	formation	Formation of cytoskeleton	0.00526	AR,AKAP13,EGFR,HAX1,LMOD2,NF2,MYLK,DPYSL3,TIAM1,PPP1R9A,SPARC	11
Cancer, Gastrointestinal Disease, Organismal Injury and Abnormalities	colorectal cancer	Unresectable colorectal cancer	0.00526	EGFR,MAP2K2,RET	3
Cancer, Gastrointestinal Disease, Organismal Injury and Abnormalities	upper gastrointestinal tract tumor	Metastatic upper gastrointestinal tract tumor	0.00528	AR,EGFR,RET,CLDN18	4
Developmental Disorder	agenesis	Agenesis	0.0054	AR,BACH2,AKAP13,HAX1,KLF7,RET,SP8	7
Developmental Disorder, Embryonic Development, Organismal Development, Tissue Morphology	abnormal morphology	Abnormal morphology of small branchial arch	0.00545	AKAP13,ARID3B	2
Reproductive System Development and Function, Tissue Morphology	quantity	Quantity of breast cell lines	0.00545	AR,EGFR	2
Cancer, Cell Death and Survival, Cellular Development, Cellular Function and Maintenance, Organismal Injury and Abnormalities	self-renewal	Self-renewal of cancer stem cells	0.00545	EGFR,NRP1	2
Cell Morphology, Nervous System Development and Function, Tissue Morphology	size	Size of growth cone	0.00545	DPYSL3,TIAM1	2
Cancer, Endocrine System Disorders, Organismal Injury and Abnormalities	thyroid hyperplasia	Thyroid hyperplasia	0.00545	RET,THRB	2
Cell Morphology, Cellular Development	branching	Branching of cells	0.00547	KLF7,RYK,MECP2,SDK1,RET,DPYSL3,TIAM1,PPP1R9A,NCAM2,IGSF9,TRIM3	11
Cancer, Endocrine System Disorders, Organismal Injury and Abnormalities	hyperplasia	Hyperplasia of endocrine gland	0.0055	AR,RET,TG,THRB	4
Cancer, Organismal Injury and Abnormalities	KRAS mutation negative cancer	KRAS mutation negative cancer	0.0056	EGFR,RET,MAP2K2	3
Cancer, Organismal Injury and Abnormalities	KRAS mutation negative solid tumor	KRAS mutation negative solid tumor	0.0056	EGFR,RET,MAP2K2	3
Cancer, Gastrointestinal Disease, Organismal Injury and Abnormalities	rectal adenocarcinoma	Rectal adenocarcinoma	0.00561	EGFR,CHEK2,CSMD1,CSF2RA,ESPL1,RET,PKHD1L1,PPP1R9A,NCAM2,MAP2K2,MPP6,TTN,ZNF532	13
Cancer, Organismal Injury and Abnormalities	cancer of unknown primary	Occult primary tumor	0.00561	AR,EGFR,NF2,MAP2K2,RET	5
Cancer, Organismal Injury and Abnormalities	malignant solid tumor	Refractory malignant solid tumor	0.00561	AR,EGFR,GSR,RET,TNFRSF8	5
Inflammatory Disease, Organismal Injury and Abnormalities	granuloma	Granuloma	0.00571	CTSS,GPER1,mir-33,PTPRE,RET,PTGIR	6
Connective Tissue Development and Function, Skeletal and Muscular System Development and Function, Tissue Development	morphology	Morphology of bone	0.00583	EGFR,PLEKHO1,CRKL,MECP2,SATB2,CLDN18,SP8,DVL1,SPARC,AR,GPER1,PTPRE,HMX2,THRB	14
Cell Morphology, Cellular Assembly and Organization, Cellular Function and Maintenance	formation	Formation of lamellipodia	0.00585	EGFR,PLEKHO1,CRKL,NRP1,RET,SPARC	6
Skeletal and Muscular System Development and Function	morphology	Morphology of skeleton	0.00586	HOXC8,GPER1,HAX1,CRKL,PTPRE,SP8,DVL1,ECE2,SPARC	9
Cancer, Organismal Injury and Abnormalities, Respiratory Disease	advanced lung cancer	Advanced lung cancer	0.00594	EGFR,ESPL1,RET,MAP2K2,DPYSL3,RPS11,ADAMTS1,THRB	8
Cancer, Gastrointestinal Disease, Organismal Injury and Abnormalities	BRAF mutation positive colorectal cancer	Metastatic BRAF mutation positive colorectal cancer	0.00596	EGFR,RET,MAP2K2	3
Cancer, Organismal Injury and Abnormalities	neoplasia	High-risk neoplasia	0.00613	AR,CSF2RA,MAP2K2,RET,TNFRSF8	5
Cell Cycle	interphase	Interphase of carcinoma cell lines	0.00619	EGFR,DESI2,CHEK2,THRB	4
Developmental Disorder, Embryonic Development, Organismal Development, Tissue Morphology	abnormal morphology	Abnormal morphology of embryo	0.00621	EGFR,AKAP13,NF2,LAMA1,SATB2,ESPL1,RET,SP8,DVL1,ACVR1B,AR,PROS1,NRP1,ARID3B	14
Gastrointestinal Disease	absorption	Abnormal absorption of food	0.00626	EGFR,HSD17B4	2
Cellular Assembly and Organization, Cellular Function and Maintenance	anchoring	Anchoring of microtubules	0.00626	PCM1,CEP350	2
Cellular Growth and Proliferation	colony formation	Colony formation of squamous cell carcinoma cell lines	0.00626	EGFR,CCAT1	2
Cardiovascular Disease, Neurological Disease	disruption	Disruption of blood-brain barrier	0.00626	PROS1,MYLK	2
Gastrointestinal Disease	hypoperistalsis	Hypoperistalsis	0.00626	RET,MYLK	2
Cancer, Endocrine System Disorders, Organismal Injury and Abnormalities, Tumor Morphology	progressive medullary thyroid cancer	Metastatic progressive medullary thyroid cancer	0.00626	EGFR,RET	2
Cellular Movement, Skeletal and Muscular System Development and Function	migration	Migration of myoblasts	0.00626	PLEKHO1,PTGIR	2
Cancer, Organismal Injury and Abnormalities, Respiratory Disease	RET rearrangement positive non-small cell lung cancer	RET rearrangement positive non-small cell lung carcinoma	0.00626	EGFR,RET	2
Cancer, Cell Morphology, Organismal Injury and Abnormalities	shape change	Shape change of tumor cells	0.00626	AKAP13,NF2	2
Cancer, Dermatological Diseases and Conditions, Organismal Injury and Abnormalities	cutaneous melanoma	Stage I-II cutaneous melanoma	0.00626	CSF2RA,MAP2K2	2
Cancer, Endocrine System Disorders, Organismal Injury and Abnormalities	medullary thyroid carcinoma	Symptomatic stage locoregional medullary thyroid carcinoma	0.00626	EGFR,RET	2
Cancer, Endocrine System Disorders, Organismal Injury and Abnormalities	medullary thyroid carcinoma	Symptomatic stage persistent medullary thyroid carcinoma	0.00626	EGFR,RET	2

## Sheet: C. Canonical Pathways
Ingenuity Canonical Pathways	-log(p-value)	Ratio	Genes
Sperm Motility	2.01	0.0267	EGFR,RYK,CSF2RA,RET,PNPLA8,PDE1A
cAMP-mediated signaling	2	0.0264	AKAP13,GPER1,TBXA2R,MAP2K2,PTGIR,PDE1A
Gαs Signaling	1.97	0.0374	GPER1,MAP2K2,PTGIR,GNB2
Actin Cytoskeleton Signaling	1.94	0.0256	CRKL,MYLK,MAP2K2,PIK3R5,TIAM1,TTN
IL-15 Production	1.79	0.0331	EGFR,RYK,CSF2RA,RET
Telomerase Signaling	1.77	0.0328	POT1,EGFR,MAP2K2,PIK3R5
Eicosanoid Signaling	1.76	0.0441	TBXA2R,PNPLA8,PTGIR
Colorectal Cancer Metastasis Signaling	1.68	0.0225	APPL1,EGFR,MAP2K2,PIK3R5,DVL1,GNB2
Role of PI3K/AKT Signaling in the Pathogenesis of Influenza	1.58	0.0375	CRKL,MAP2K2,PIK3R5
CCR3 Signaling in Eosinophils	1.58	0.0286	MYLK,MAP2K2,PIK3R5,GNB2
G-Protein Coupled Receptor Signaling	1.55	0.021	GPER1,TBXA2R,MAP2K2,PIK3R5,PTGIR,PDE1A
GM-CSF Signaling	1.52	0.0357	CSF2RA,MAP2K2,PIK3R5
SPINK1 General Cancer Pathway	1.51	0.0353	EGFR,MAP2K2,PIK3R5
Acetate Conversion to Acetyl-CoA	1.5	0.25	ACSS3,
Glutathione Redox Reactions II	1.5	0.25	GSR,
GDNF Family Ligand-Receptor Interactions	1.48	0.0345	MAP2K2,RET,PIK3R5
Thrombin Signaling	1.47	0.0224	EGFR,MYLK,MAP2K2,PIK3R5,GNB2
Non-Small Cell Lung Cancer Signaling	1.47	0.0341	EGFR,MAP2K2,PIK3R5
Antiproliferative Role of Somatostatin Receptor 2	1.45	0.0333	MAP2K2,PIK3R5,GNB2
Estrogen-Dependent Breast Cancer Signaling	1.45	0.0333	EGFR,HSD17B4,PIK3R5
Ovarian Cancer Signaling	1.44	0.0258	EGFR,MAP2K2,PIK3R5,DVL1
Integrin Signaling	1.43	0.0218	CRKL,MYLK,MAP2K2,PIK3R5,TTN
IL-3 Signaling	1.41	0.0323	CRKL,MAP2K2,PIK3R5
Neuregulin Signaling	1.38	0.0312	EGFR,CRKL,MAP2K2
Protein Kinase A Signaling	1.37	0.0175	AKAP13,PTPRE,MYLK,MAP2K2,TTN,PDE1A,GNB2
VEGF Family Ligand-Receptor Interactions	1.34	0.0303	NRP1,MAP2K2,PIK3R5
Regulation of eIF4 and p70S6K Signaling	1.33	0.0238	MAP2K2,PIK3R5,RPS11,RPS3A
PDGF Signaling	1.32	0.0297	CRKL,MAP2K2,PIK3R5
Acute Myeloid Leukemia Signaling	1.3	0.0291	CSF2RA,MAP2K2,PIK3R5
Wnt/β-catenin Signaling	1.29	0.0231	APPL1,NLK,DVL1,ACVR1B
Prostate Cancer Signaling	1.27	0.0283	AR,MAP2K2,PIK3R5
Acetyl-CoA Biosynthesis I (Pyruvate Dehydrogenase Complex)	1.26	0.143	PDHA1,
ErbB Signaling	1.24	0.0275	EGFR,MAP2K2,PIK3R5
Glioblastoma Multiforme Signaling	1.24	0.0222	EGFR,NF2,MAP2K2,PIK3R5
FAK Signaling	1.23	0.0273	EGFR,MAP2K2,PIK3R5
PAK Signaling	1.21	0.0268	MYLK,MAP2K2,PIK3R5
Thyroid Cancer Signaling	1.2	0.0392	MAP2K2,RET
UVC-Induced MAPK Signaling	1.19	0.0385	EGFR,MAP2K2
Nitric Oxide Signaling in the Cardiovascular System	1.19	0.0261	MAP2K2,PIK3R5,PDE1A
Chronic Myeloid Leukemia Signaling	1.18	0.0259	CRKL,MAP2K2,PIK3R5
Mouse Embryonic Stem Cell Pluripotency	1.17	0.0256	MAP2K2,PIK3R5,DVL1
Phosphatidylethanolamine Biosynthesis II	1.16	0.111	ETNK1,
Docosahexaenoic Acid (DHA) Signaling	1.16	0.037	PNPLA2,PIK3R5
HGF Signaling	1.11	0.0242	CRKL,MAP2K2,PIK3R5
Pancreatic Adenocarcinoma Signaling	1.11	0.0242	EGFR,MAP2K2,PIK3R5
Glioma Signaling	1.1	0.024	EGFR,MAP2K2,PIK3R5
Regulation of the Epithelial-Mesenchymal Transition Pathway	1.1	0.0199	EGFR,MAP2K2,PIK3R5,DVL1
PTEN Signaling	1.09	0.0238	EGFR,MAP2K2,PIK3R5
Semaphorin Signaling in Neurons	1.08	0.0333	NRP1,DPYSL3
Rac Signaling	1.08	0.0236	MAP2K2,PIK3R5,TIAM1
Autophagy	1.07	0.0328	CTSS,CTSH
Gap Junction Signaling	1.05	0.019	EGFR,GRIA2,MAP2K2,PIK3R5
fMLP Signaling in Neutrophils	1.05	0.0227	MAP2K2,PIK3R5,GNB2
Adrenomedullin signaling pathway	1.05	0.019	MYLK,MAP2K2,PIK3R5,TTN
Role of NANOG in Mammalian Embryonic Stem Cell Pluripotency	1.04	0.0226	MAP2K2,PIK3R5,DVL1
Leukocyte Extravasation Signaling	1.03	0.0188	CRKL,CLDN18,MAP2K2,PIK3R5
IL-8 Signaling	1.02	0.0186	EGFR,MAP2K2,PIK3R5,GNB2
Role of Tissue Factor in Cancer	1.02	0.0222	EGFR,PIK3R5,P4HB
Melanoma Signaling	1.01	0.0303	MAP2K2,PIK3R5
Mitotic Roles of Polo-Like Kinase	1.01	0.0303	CHEK2,ESPL1
Cardiac β-adrenergic Signaling	0.989	0.0214	AKAP13,PDE1A,GNB2
UVB-Induced MAPK Signaling	0.986	0.0294	EGFR,PIK3R5
CREB Signaling in Neurons	0.985	0.018	GRIA2,MAP2K2,PIK3R5,GNB2
Cardiac Hypertrophy Signaling (Enhanced)	0.973	0.0141	AKAP13,MAP2K2,PIK3R5,TG,DVL1,PDE1A,ACVR1B
P2Y Purigenic Receptor Signaling Pathway	0.968	0.021	MAP2K2,PIK3R5,GNB2
p70S6K Signaling	0.968	0.021	EGFR,MAP2K2,PIK3R5
EGF Signaling	0.965	0.0286	EGFR,PIK3R5
Role of IL-17A in Arthritis	0.965	0.0286	MAP2K2,PIK3R5
Axonal Guidance Signaling	0.963	0.014	CRKL,NRP1,MAP2K2,PIK3R5,ADAMTS1,ECE2,GNB2
Gα12/13 Signaling	0.948	0.0205	TBXA2R,MAP2K2,PIK3R5
Telomere Extension by Telomerase	0.944	0.0667	POT1,
EIF2 Signaling	0.934	0.0172	MAP2K2,PIK3R5,RPS11,RPS3A
CNTF Signaling	0.925	0.027	MAP2K2,PIK3R5
Insulin Receptor Signaling	0.922	0.02	CRKL,MAP2K2,PIK3R5
Extrinsic Prothrombin Activation Pathway	0.918	0.0625	PROS1,
Glutaryl-CoA Degradation	0.918	0.0625	HSD17B4,
Endometrial Cancer Signaling	0.916	0.0267	MAP2K2,PIK3R5
IL-2 Signaling	0.916	0.0267	MAP2K2,PIK3R5
Thrombopoietin Signaling	0.916	0.0267	MAP2K2,PIK3R5
Role of Macrophages, Fibroblasts and Endothelial Cells in Rheumatoid Arthritis	0.91	0.0153	RYK,MAP2K2,PIK3R5,NLK,DVL1
Hereditary Breast Cancer Signaling	0.892	0.0194	CHEK2,PIK3R5,FAAP100
Agrin Interactions at Neuromuscular Junction	0.888	0.0256	EGFR,DVL1
ErbB2-ErbB3 Signaling	0.87	0.025	MAP2K2,PIK3R5
IL-17A Signaling in Airway Cells	0.87	0.025	MAP2K2,PIK3R5
Role of BRCA1 in DNA Damage Response	0.87	0.025	CHEK2,FAAP100
CD40 Signaling	0.862	0.0247	MAP2K2,PIK3R5
Role of MAPK Signaling in the Pathogenesis of Influenza	0.853	0.0244	MAP2K2,PNPLA8
ErbB4 Signaling	0.845	0.0241	MAP2K2,PIK3R5
Relaxin Signaling	0.845	0.0184	PIK3R5,PDE1A,GNB2
Tight Junction Signaling	0.817	0.0179	CLDN18,MYLK,TIAM1
IL-15 Signaling	0.812	0.023	MAP2K2,PIK3R5
Signaling by Rho Family GTPases	0.81	0.0154	MYLK,MAP2K2,PIK3R5,GNB2
Oxidative Ethanol Degradation III	0.808	0.0476	ACSS3,
Leptin Signaling in Obesity	0.804	0.0227	MAP2K2,PIK3R5
Neurotrophin/TRK Signaling	0.804	0.0227	MAP2K2,PIK3R5
Gαq Signaling	0.791	0.0173	MAP2K2,PIK3R5,GNB2
Polyamine Regulation in Colon Cancer	0.79	0.0455	AZIN1,
Aldosterone Signaling in Epithelial Cells	0.786	0.0172	DNAJC27,MAP2K2,PIK3R5
Erythropoietin Signaling	0.782	0.022	MAP2K2,PIK3R5
FGF Signaling	0.774	0.0217	CRKL,PIK3R5
Factors Promoting Cardiogenesis in Vertebrates	0.767	0.0215	DVL1,ACVR1B
Renal Cell Carcinoma Signaling	0.767	0.0215	MAP2K2,PIK3R5
JAK/Stat Signaling	0.76	0.0213	MAP2K2,PIK3R5
Prolactin Signaling	0.76	0.0213	MAP2K2,PIK3R5
Reelin Signaling in Neurons	0.76	0.0213	CRKL,PIK3R5
Ephrin Receptor Signaling	0.756	0.0167	CRKL,MAP2K2,GNB2
Glutathione Redox Reactions I	0.755	0.0417	GSR,
FLT3 Signaling in Hematopoietic Progenitor Cells	0.753	0.0211	MAP2K2,PIK3R5
α-Adrenergic Signaling	0.753	0.0211	MAP2K2,GNB2
IL-17 Signaling	0.746	0.0208	MAP2K2,PIK3R5
TGF-β Signaling	0.746	0.0208	MAP2K2,ACVR1B
CXCR4 Signaling	0.741	0.0164	MAP2K2,PIK3R5,GNB2
Bladder Cancer Signaling	0.739	0.0206	EGFR,MAP2K2
Ethanol Degradation IV	0.739	0.04	ACSS3,
IL-17A Signaling in Gastric Cells	0.739	0.04	EGFR,
Tryptophan Degradation III (Eukaryotic)	0.739	0.04	HSD17B4,
LPS-stimulated MAPK Signaling	0.732	0.0204	MAP2K2,PIK3R5
PEDF Signaling	0.732	0.0204	PNPLA2,PIK3R5
Sertoli Cell-Sertoli Cell Junction Signaling	0.727	0.0161	CLDN18,MAP2K2,MPP6
HER-2 Signaling in Breast Cancer	0.725	0.0202	EGFR,PIK3R5
TR/RXR Activation	0.719	0.02	PIK3R5,THRB
Synaptic Long Term Depression	0.713	0.0159	GRIA2,MAP2K2,PNPLA8
RANK Signaling in Osteoclasts	0.693	0.0192	MAP2K2,PIK3R5
Role of NFAT in Regulation of the Immune Response	0.682	0.0153	MAP2K2,PIK3R5,GNB2
CDK5 Signaling	0.669	0.0185	LAMA1,MAP2K2
Melanocyte Development and Pigmentation Signaling	0.669	0.0185	MAP2K2,PIK3R5
G Protein Signaling Mediated by Tubby	0.656	0.0323	GNB2,
Molecular Mechanisms of Cancer	0.655	0.0124	CHEK2,MAP2K2,PIK3R5,NLK,DVL1
Antioxidant Action of Vitamin C	0.651	0.018	CSF2RA,PNPLA8
Endothelin-1 Signaling	0.649	0.0147	PIK3R5,PNPLA8,ECE2
4-1BB Signaling in T Lymphocytes	0.644	0.0312	MAP2K2,
Fatty Acid β-oxidation I	0.644	0.0312	HSD17B4,
Amyotrophic Lateral Sclerosis Signaling	0.64	0.0177	GRIA2,PIK3R5
p53 Signaling	0.64	0.0177	CHEK2,PIK3R5
NRF2-mediated Oxidative Stress Response	0.64	0.0146	GSR,MAP2K2,PIK3R5
UVA-Induced MAPK Signaling	0.634	0.0175	EGFR,PIK3R5
VEGF Signaling	0.634	0.0175	MAP2K2,PIK3R5
ERK/MAPK Signaling	0.633	0.0144	CRKL,MAP2K2,PIK3R5
Circadian Rhythm Signaling	0.632	0.0303	PER3,
Apelin Cardiomyocyte Signaling Pathway	0.629	0.0174	MYLK,PIK3R5
SAPK/JNK Signaling	0.629	0.0174	CRKL,PIK3R5
IGF-1 Signaling	0.623	0.0172	MAP2K2,PIK3R5
DNA Methylation and Transcriptional Repression Signaling	0.621	0.0294	MECP2,
Ethanol Degradation II	0.621	0.0294	ACSS3,
Neuropathic Pain Signaling In Dorsal Horn Neurons	0.618	0.0171	GRIA2,PIK3R5
Coagulation System	0.61	0.0286	PROS1,
Cholecystokinin/Gastrin-mediated Signaling	0.607	0.0168	EGFR,MAP2K2
Breast Cancer Regulation by Stathmin1	0.606	0.014	MAP2K2,PIK3R5,GNB2
T Cell Receptor Signaling	0.602	0.0167	MAP2K2,PIK3R5
G Beta Gamma Signaling	0.592	0.0164	EGFR,GNB2
RhoA Signaling	0.587	0.0163	MYLK,TTN
mTOR Signaling	0.584	0.0136	PIK3R5,RPS11,RPS3A
Gαi Signaling	0.577	0.016	TBXA2R,GNB2
Synaptogenesis Signaling Pathway	0.573	0.0122	CRKL,GRIA2,PIK3R5,TIAM1
NGF Signaling	0.563	0.0156	MAP2K2,PIK3R5
Synaptic Long Term Potentiation	0.558	0.0155	GRIA2,MAP2K2
Role of NFAT in Cardiac Hypertrophy	0.556	0.0131	MAP2K2,PIK3R5,GNB2
Apelin Endothelial Signaling Pathway	0.554	0.0154	MAP2K2,PIK3R5
Fc Epsilon RI Signaling	0.554	0.0154	MAP2K2,PIK3R5
Estrogen Biosynthesis	0.551	0.0244	HSD17B4,
Cellular Effects of Sildenafil (Viagra)	0.549	0.0153	MYLK,PDE1A
Endocannabinoid Developing Neuron Pathway	0.549	0.0153	MAP2K2,PIK3R5
Intrinsic Prothrombin Activation Pathway	0.542	0.0238	PROS1,
Retinol Biosynthesis	0.542	0.0238	PNPLA2,
tRNA Splicing	0.542	0.0238	PDE1A,
Natural Killer Cell Signaling	0.54	0.015	MAP2K2,PIK3R5
Renin-Angiotensin Signaling	0.54	0.015	MAP2K2,PIK3R5
CD28 Signaling in T Helper Cells	0.536	0.0149	MAP2K2,PIK3R5
Oncostatin M Signaling	0.534	0.0233	MAP2K2,
GP6 Signaling Pathway	0.531	0.0148	LAMA1,PIK3R5
STAT3 Pathway	0.531	0.0148	EGFR,MAP2K2
Androgen Signaling	0.527	0.0147	AR,GNB2
Role of IL-17F in Allergic Inflammatory Airway Diseases	0.517	0.0222	MAP2K2,
Role of p14/p19ARF in Tumor Suppression	0.517	0.0222	PIK3R5,
IL-6 Signaling	0.514	0.0144	MAP2K2,PIK3R5
FAT10 Cancer Signaling Pathway	0.509	0.0217	ACVR1B,
PFKFB4 Signaling Pathway	0.509	0.0217	MAP2K2,
IL-9 Signaling	0.502	0.0213	PIK3R5,
14-3-3-mediated Signaling	0.502	0.0141	MAP2K2,PIK3R5
Autoimmune Thyroid Disease Signaling	0.487	0.0204	TG,
Cell Cycle: G2/M DNA Damage Checkpoint Regulation	0.487	0.0204	CHEK2,
Huntington's Disease Signaling	0.484	0.0119	EGFR,PIK3R5,GNB2
Human Embryonic Stem Cell Pluripotency	0.482	0.0136	PIK3R5,DVL1
Cardiac Hypertrophy Signaling	0.478	0.0118	MAP2K2,PIK3R5,GNB2
IL-12 Signaling and Production in Macrophages	0.478	0.0135	MAP2K2,PIK3R5
Phagosome Maturation	0.478	0.0135	CTSS,CTSH
Th2 Pathway	0.463	0.0132	PIK3R5,ACVR1B
CD27 Signaling in Lymphocytes	0.459	0.0189	MAP2K2,
Epithelial Adherens Junction Signaling	0.459	0.0131	EGFR,ACVR1B
Triacylglycerol Degradation	0.453	0.0185	PNPLA2,
Cell Cycle Control of Chromosomal Replication	0.44	0.0179	CHEK2,
Unfolded protein response	0.44	0.0179	P4HB,
Endocannabinoid Cancer Inhibition Pathway	0.438	0.0126	MAP2K2,PIK3R5
Glutamate Receptor Signaling	0.434	0.0175	GRIA2,
Role of CHK Proteins in Cell Cycle Checkpoint Control	0.434	0.0175	CHEK2,
Cancer Drug Resistance By Drug Efflux	0.428	0.0172	MAP2K2,
Apelin Pancreas Signaling Pathway	0.422	0.0169	PIK3R5,
IL-23 Signaling Pathway	0.417	0.0167	PIK3R5,
PCP pathway	0.411	0.0164	DVL1,
Ephrin A Signaling	0.406	0.0161	PIK3R5,
Wnt/Ca+ pathway	0.406	0.0161	DVL1,
Mitochondrial Dysfunction	0.399	0.0117	GSR,PDHA1
GNRH Signaling	0.393	0.0116	EGFR,MAP2K2
Phospholipases	0.39	0.0154	PNPLA8,
Pyridoxal 5'-phosphate Salvage Pathway	0.39	0.0154	MAP2K2,
Regulation of Cellular Mechanics by Calpain Protease	0.385	0.0152	EGFR,
Tec Kinase Signaling	0.373	0.0111	PIK3R5,GNB2
HMGB1 Signaling	0.37	0.011	MAP2K2,PIK3R5
Lymphotoxin β Receptor Signaling	0.37	0.0145	PIK3R5,
Caveolar-mediated Endocytosis Signaling	0.361	0.0141	EGFR,
Hepatic Fibrosis / Hepatic Stellate Cell Activation	0.356	0.0108	EGFR,LAMA1
ERK5 Signaling	0.356	0.0139	EGFR,
Ephrin B Signaling	0.356	0.0139	GNB2,
Melatonin Signaling	0.356	0.0139	MAP2K2,
Th1 and Th2 Activation Pathway	0.354	0.0107	PIK3R5,ACVR1B
Basal Cell Carcinoma Signaling	0.352	0.0137	DVL1,
Germ Cell-Sertoli Cell Junction Signaling	0.351	0.0106	MAP2K2,PIK3R5
Hypoxia Signaling in the Cardiovascular System	0.348	0.0135	P4HB,
MSP-RON Signaling Pathway	0.348	0.0135	PIK3R5,
PPARα/RXRα Activation	0.348	0.0106	MAP2K2,ACVR1B
NF-κB Signaling	0.346	0.0105	EGFR,PIK3R5
T Cell Exhaustion Signaling Pathway	0.346	0.0105	PIK3R5,ACVR1B
Role of Wnt/GSK-3β Signaling in the Pathogenesis of Influenza	0.331	0.0128	DVL1,
B Cell Receptor Signaling	0.328	0.0102	MAP2K2,PIK3R5
Chemokine Signaling	0.323	0.0125	MAP2K2,
Myc Mediated Apoptosis Signaling	0.323	0.0125	PIK3R5,
Role of JAK1 and JAK3 in γc Cytokine Signaling	0.319	0.0123	PIK3R5,
3-phosphoinositide Biosynthesis	0.31	0.00976	EGFR,PIK3R5
BMP signaling pathway	0.305	0.0118	MAP2K2,
HIPPO signaling	0.305	0.0118	NF2,
Growth Hormone Signaling	0.301	0.0116	PIK3R5,
Small Cell Lung Cancer Signaling	0.298	0.0115	PIK3R5,
Angiopoietin Signaling	0.291	0.0112	PIK3R5,
Regulation of IL-2 Expression in Activated and Anergic T Lymphocytes	0.291	0.0112	MAP2K2,
FcγRIIB Signaling in B Lymphocytes	0.288	0.0111	PIK3R5,
Glioma Invasiveness Signaling	0.288	0.0111	PIK3R5,
IL-1 Signaling	0.284	0.011	GNB2,
Macropinocytosis Signaling	0.281	0.0109	PIK3R5,
IL-7 Signaling Pathway	0.278	0.0108	PIK3R5,
CCR5 Signaling in Macrophages	0.275	0.0106	GNB2,
Regulation of Actin-based Motility by Rho	0.275	0.0106	MYLK,
Glucocorticoid Receptor Signaling	0.273	0.00857	AR,MAP2K2,PIK3R5
ATM Signaling	0.266	0.0103	CHEK2,
Salvage Pathways of Pyrimidine Ribonucleotides	0.266	0.0103	MAP2K2,
NF-κB Activation by Viruses	0.263	0.0102	PIK3R5,
Apoptosis Signaling	0.26	0.0101	MAP2K2,
IL-4 Signaling	0.26	0.0101	PIK3R5,
CTLA4 Signaling in Cytotoxic T Lymphocytes	0.254	0.0099	PIK3R5,
Sumoylation Pathway	0.249	0.00971	AR,
Role of Osteoblasts, Osteoclasts and Chondrocytes in Rheumatoid Arthritis	0.247	0.00847	PIK3R5,DVL1
Ceramide Signaling	0.246	0.00962	PIK3R5,
PPAR Signaling	0.246	0.00962	MAP2K2,
Superpathway of Inositol Phosphate Compounds	0.24	0.00833	EGFR,PIK3R5
Neuroprotective Role of THOP1 in Alzheimer's Disease	0.208	0.00833	ECE2,
Virus Entry via Endocytic Pathways	0.205	0.00826	PIK3R5,
Paxillin Signaling	0.199	0.00806	PIK3R5,
AMPK Signaling	0	0.00442	PIK3R5,
Acute Phase Response Signaling	0	0.00559	MAP2K2,
Agranulocyte Adhesion and Diapedesis	0	0.00521	CLDN18,
Aryl Hydrocarbon Receptor Signaling	0	0.00699	CHEK2,
Atherosclerosis Signaling	0	0.00781	PNPLA8,
Calcium Signaling	0	0.00485	GRIA2,
Cdc42 Signaling	0	0.00599	MYLK,
Clathrin-mediated Endocytosis Signaling	0	0.00481	PIK3R5,
Corticotropin Releasing Hormone Signaling	0	0.00699	MAP2K2,
Dendritic Cell Maturation	0	0.0051	PIK3R5,
Endocannabinoid Neuronal Synapse Pathway	0	0.00781	GRIA2,
Estrogen Receptor Signaling	0	0.0073	MAP2K2,
Granulocyte Adhesion and Diapedesis	0	0.00559	CLDN18,
Gustation Pathway	0	0.00654	PDE1A,
HIF1α Signaling	0	0.00775	PIK3R5,
ILK Signaling	0	0.00488	PIK3R5,
Iron homeostasis signaling pathway	0	0.0073	EGFR,
Neuroinflammation Signaling Pathway	0	0.00639	PIK3R5,ACVR1B
Opioid Signaling Pathway	0	0.008	MAP2K2,PDE1A
PI3K Signaling in B Lymphocytes	0	0.00725	MAP2K2,
PI3K/AKT Signaling	0	0.00758	MAP2K2,
PKCθ Signaling in T Lymphocytes	0	0.00588	PIK3R5,
Phagosome Formation	0	0.00714	PIK3R5,
Phospholipase C Signaling	0	0.00778	MAP2K2,GNB2
Production of Nitric Oxide and Reactive Oxygen Species in Macrophages	0	0.0049	PIK3R5,
Protein Ubiquitination Pathway	0	0.00738	DNAJC27,UBE4A
RhoGDI Signaling	0	0.00556	GNB2,
Role of Pattern Recognition Receptors in Recognition of Bacteria and Viruses	0	0.00592	PIK3R5,
Sirtuin Signaling Pathway	0	0.00342	PDHA1,
Sphingosine-1-phosphate Signaling	0	0.00746	PIK3R5,
Systemic Lupus Erythematosus Signaling	0	0.00418	PIK3R5,
Th1 Pathway	0	0.0073	PIK3R5,
Type II Diabetes Mellitus Signaling	0	0.00645	PIK3R5,
Xenobiotic Metabolism Signaling	0	0.0066	MAP2K2,PIK3R5
eNOS Signaling	0	0.00575	PIK3R5,
iCOS-iCOSL Signaling in T Helper Cells	0	0.008	PIK3R5,

## Sheet: D. Networks
ID	Genes in Network	Score	Genes from Input Data	Top Diseases and Functions
1	14-3-3,AKAP13,APPL1,Akt,DECR1,ESPL1,FAM118B,GSR,HDL-cholesterol,KCNE3,LANCL2,LDL-cholesterol,MAP2K1/2,MECP2,MOGAT2,MYBPC1,MYLK,NF2,NRP1,OBSCN,PNPLA2,PTPRE,Pak,Pka catalytic subunit,Raf,SGTB,SLC25A12,SPRED1,SPRR3,TACC2,TRIM55,TTN,YTHDC1,mir-33,myosin-light-chain kinase	51	26	Protein Synthesis, Cardiovascular System Development and Function, Cellular Assembly and Organization
2	ADRB,ANK3,Alp,CD3,CRKL,CaMKII,Cofilin,Creb,DVL1,Hdac,Histone h4,MAP2K2,Mek,NCAM2,NFkB (complex),NKTR,NLK,PHTF1,PP1 protein complex group,PPP1R9A,Pias,RET,RNF216,RYK,Rb,SATB2,SDK1,SETX,Sos,TCF,TIAM1,TNFRSF8,TSHZ3,UBE4A,ZKSCAN1	36	20	Cell Morphology, Cellular Assembly and Organization, Cellular Development
3	B4GALT4,CHEK2,CSF2RA,CTSH,CTSS,Collagen type I,Collagen(s),Cyclin A,Cyclin E,DESI2,EPYC,ERK1/2,GRIA2,HCN4,LAMA1,Laminin (complex),Laminin1,N-cor,P4HB,PDGF (family),PDGF BB,PER3,PROS1,Pdgf (complex),Pkg,SMAD1/5,SPARC,STRN3,TG,THRB,TSH,TSPYL2,Wnt,ZNF703,collagen	33	19	Endocrine System Disorders, Metabolic Disease, Organismal Injury and Abnormalities
4	CAPN15,CCNK,CSMD1,DIP2C,ENOSF1,ERV3-1,FRYL,GTF2H2C,HDAC4,HNRNPL,IGSF9,IMPG2,KCNRG,KLHL18,LMOD2,MAN1C1,MAN2B2,MPP6,NETO1,POLR2J2/POLR2J3,RASGEF1C,RIC1,RIPOR1,SERINC5,SHISA9,SLC25A36,SLC35A4,SLC8B1,STEAP1B,TM7SF3,TRIM25,ZFAND3,ZNF532,ZNF608,heparin	29	17	Developmental Disorder, Hereditary Disorder, Ophthalmic Disease
5	ADCY,ARID3B,Calmodulin,DPYSL3,EGFR,G protein alphai,G protein beta gamma,G-protein beta,G-protein gamma,GALNT10,GNB2,GPER1,Gpcr,HAX1,HSD17B4,LRPPRC,LSR,NADPH oxidase,PDHA1,PI3K p85,PIK3R5,PLC,PLC gamma,POT1,PTGIR,PTK,Rac,Ras homolog,SPA17,SRC (family),Sfk,Shc,TBXA2R,estrogen receptor,p85 (pik3r)	27	16	Lipid Metabolism, Molecular Transport, Small Molecule Biochemistry
6	AFF2,ARNT2,BMP4,BMP8A,BNC2,CCDC144B,CEP41,CLDN18,DICER1,EGR1,EPS15,ETNK1,FADD,FAM83A,HMX2,HOXC12,KCNT1,KCTD15,KRTAP2-3/KRTAP2-4,NKX2-1,RB1,Rpl29 (includes others),SCN10A,SHROOM1,SPOPL,TMEM190,TRIM27,XPO1,miR-331-3p (miRNAs w/seed CCCCUGG),miR-490-3p (miRNAs w/seed AACCUGG),mir-331,mir-490,mir-497,mir-551,tretinoin	22	14	Endocrine System Disorders, Organ Morphology, Organismal Injury and Abnormalities
7	ADAMTS1,Ap1,BACH2,CCAT1,Complement,ECE2,ERK,FSH,GYPE,Growth hormone,HEATR1,Hsp90,IL1,Ifn,IgG,Ige,Immunoglobulin,Interferon alpha,LDL,LINC00599,LTBP4,Lh,Mapk,Metalloprotease,PTMA,RPS11,RPS3A,Rnr,SPOCK1,STAP1,STAT,STAT5a/b,Tgf beta,Vegf,cytokine	20	13	Cell Cycle, Connective Tissue Disorders, Dermatological Diseases and Conditions
8	26s Proteasome,AR,Actin,CG,Ck2,DAPL1,DNAH1,DNAI1,DNAJC27,EWSR1,F Actin,Focal adhesion kinase,Gsk3,Histone h3,Hsp70,Insulin,Integrin,Jnk,KLF7,NOP2,P38 MAPK,PI3K (complex),PLEKHO1,PNPLA8,Pka,Pkc(s),Proinsulin,RAS,RNA polymerase II,SHROOM3,TCR,TFCP2,UBN1,Ubiquitin,caspase	20	13	Cardiovascular Disease, Developmental Disorder, Hereditary Disorder
9	ACSS3,AHNAK2,AKT1,ANXA2,ANXA3,CCDC170,CLYBL,COA4,CPXM1,Ca2+,FAM129A,FUT6,GPR137,GPR139,GPR173,GPR88,HNF4A,HNRNPA2B1,HOXC8,LMBRD2,MGC108823 (includes others),MRPL51,OPRM1,PDE1A,PITPNM3,SLC24A3,SNCA,SSR2,STK32B,SVEP1,TRAPPC13,TRIM3,VN1R1,beta-estradiol,mir-802	20	13	Cell Morphology, Cellular Function and Maintenance, Carbohydrate Metabolism
10	ACVR1B,ADAT1,ANKRD10,AZIN1,C12orf57,C20orf194,CA5B,CEBPA,CELF1,DMAC2,EGLN3,ELAVL1,GPN2,KATNAL2,LDLRAD3,MEX3D,MXRA7,NUBP1,NXF1,OAZ2,OSGIN2,SDE2,SP8,SPIN4,SPRY2,SZRD1,TANGO6,TATDN2,TCEAL8,TTL,TUG1,XXYLT1,ZBTB41,ZCCHC14,ZNF45	16	11	Small Molecule Biochemistry, Cellular Development, Connective Tissue Development and Function
11	AVIL,C2CD3,CCDC66,CEP135,CEP350,CIR1,COMMD4,CYLD,FA,FAAP100,FAAP20,FAAP24,FANCD2,FIGNL1,GALK1,HDX,KIAA1328,KIZ,KRT25,MTAP,MYO1F,NCBP2-AS2,NUP58,ODR4,PCM1,PLEKHA8,RTTN,SCLT1,SPATA2L,SPIDR,TEX9,TIMM23B,TMEM209,TPGS1,TTLL4	16	11	Cell Cycle, Cellular Assembly and Organization, DNA Replication, Recombination, and Repair
12	PKHD1L1,SRF	2	1	Cardiovascular Disease, Embryonic Development, Molecular Transport
13	DRC3,MFHAS1	2	1	Cancer, Organismal Injury and Abnormalities, Connective Tissue Disorders
14	CST7,STK32A	2	1	Cancer, Endocrine System Disorders, Organismal Injury and Abnormalities
