# Supplementary material for: Whole Genome Sequencing of Familial Non-Medullary Thyroid Cancer Identifies Germline Alterations in MAPK/ERK and PI3K/AKT Signaling Pathways
Source: Preprints.org preprint supplement (doi:10.20944/preprints201910.0154.v1), 2019-10-13
Supplement: Supplementary file 2 [file supplementary]

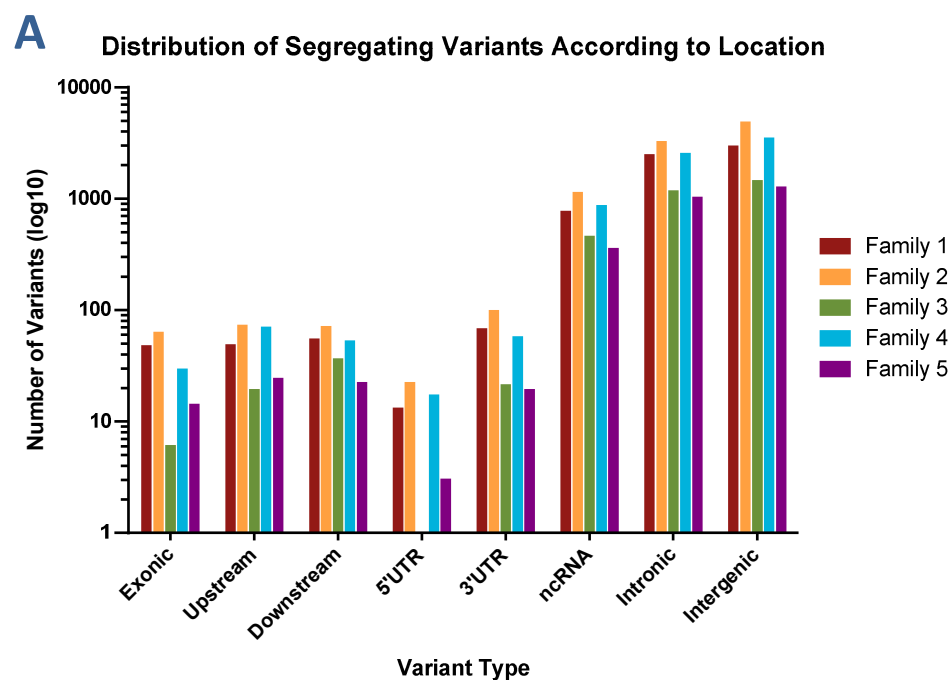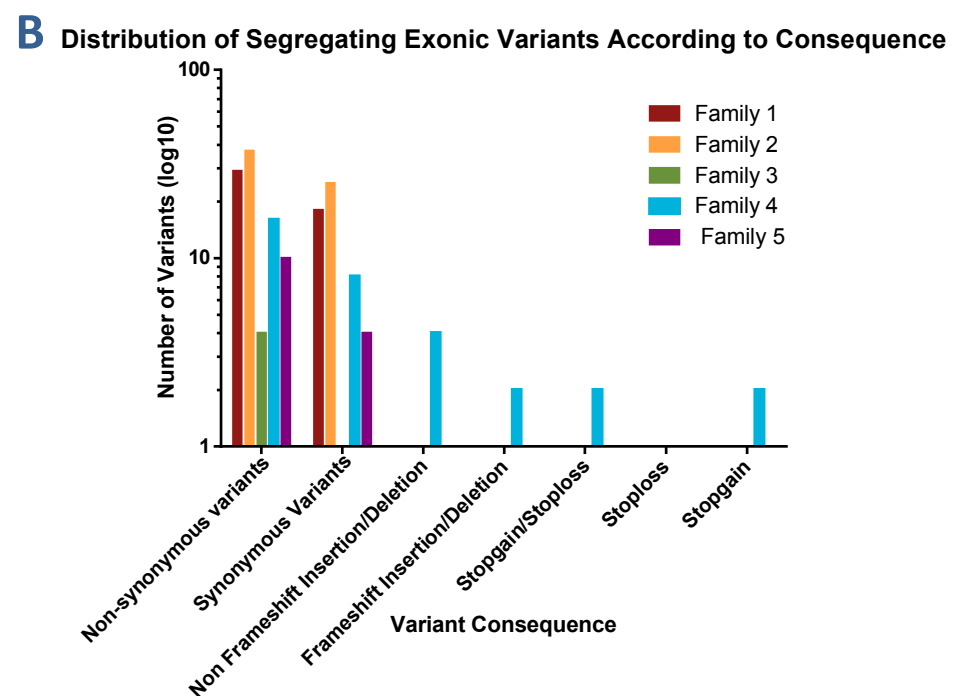

**Figure S1.** (a) Location-based distribution of all variants segregating in each family; (b) Distribution of exonic variants segregating in each family according to their consequence on the protein sequence.
